# Supplementary material
Source: PubMed Central journal article supplement (PMC6792148)
Supplement: ml9b00309_si_001.pdf [file ml9b00309_si_001.pdf]

# Supporting Information

## Aminoquinoline–rhodium(II) conjugates as Src-family SH3 ligands

Samuel C. Martin, Zachary T. Ball

Department of Chemistry, Rice University, Houston, Texas

|                                                                                          |     |
|------------------------------------------------------------------------------------------|-----|
| General methods .....                                                                    | 2   |
| Chemical synthesis.....                                                                  | 3   |
| <i>N</i> -(4-bromophenyl)cinnamamide (6) .....                                           | 3   |
| 6-bromoquinolin-2(1H)-one (7).....                                                       | 3   |
| 6-bromo-2-chloroquinoline (8) .....                                                      | 4   |
| tert-butyl 4-(2-chloroquinolin-6-yl)piperazine-1-carboxylate (9).....                    | 4   |
| tert-butyl 4-(2-aminoquinolin-6-yl)piperazine-1-carboxylate (10).....                    | 5   |
| 6-(piperazin-1-yl)quinolin-2-amine (11).....                                             | 5   |
| tert-butyl 2-(4-(2-aminoquinolin-6-yl)piperazin-1-yl)acetate (12a) .....                 | 6   |
| dirhodium ligation of 2-(4-(2-aminoquinolin-6-yl)piperazin-1-yl)acetic acid (4a) .....   | 6   |
| 4-(4-(2-aminoquinolin-6-yl)piperazin-1-yl)butanoic acid (13b).....                       | 7   |
| dirhodium ligation of 4-(4-(2-aminoquinolin-6-yl)piperazin-1-yl)butanoic acid (4b).....  | 8   |
| 6-(4-(2-aminoquinolin-6-yl)piperazin-1-yl)hexanoic acid (13c) .....                      | 8   |
| dirhodium ligation of 6-(4-(2-aminoquinolin-6-yl)piperazin-1-yl)hexanoic acid (4c) ..... | 9   |
| Compound characterization .....                                                          | 10  |
| Computational docking.....                                                               | 36  |
| Coordinates of final binding model: .....                                                | 38  |
| Data for computed docked structures: .....                                               | 88  |
| References.....                                                                          | 217 |

## General methods

**Synthesis procedures:** Large scale reactions were performed in oven-dried round-bottom flasks. Small scale reactions were performed in 4-mL vials or scintillation vials. Air- or moisture-sensitive reactions were performed in vials sealed with septum caps. Insensitive reactions used bulk solvent without further purification, while air- or moisture-sensitive ones used solvent stored under argon or nitrogen. Reaction vessels were stirred magnetically; flasks were heated in an oil bath and vials in an aluminum heating block. Flash chromatography was performed with 40-63  $\mu\text{M}$  particle size silica gel (Silicycle).

**Chemicals:** Chemical reagents were purchased and used without further purification. All solvents used were ACS reagent grade. Solvents used under inert atmosphere were bought and maintained in inert packaging or purified and degassed by a solvent dispensing system (Pure Process Technology).

**NMR spectroscopy:** NMR data was acquired with Bruker Avance 400 MHz, Bruker Avance 500 MHz, or Bruker Avance III 600 MHz instrument.  $^1\text{H}$  and  $^{13}\text{C}$  NMR spectra were referenced relative to residual solvent or TMS.

**Mass spectroscopy:** Compatible samples were analyzed using an Agilent 6890 gas chromatograph. All other samples were analyzed by electrospray ionization (ESI-MS) by direct injection into a Bruker Daltonics microTOF instrument.

**Synthesis of known compounds:** N-Boc-piperazine,<sup>1</sup> *tert*-butyl 4-bromobutanoate,<sup>2</sup> methyl 6-bromohexanoate,<sup>3</sup> and  $\text{Rh}_2(\text{OAc})_3(\text{tfa})^4$  were prepared according to previously reported protocols.

**HPLC:** HPLC analyses were performed on reverse phase columns using a Shimadzu CBM-20A instrument monitoring at 254 and 350 nm. Mobile phase consisted of acetonitrile/water mixtures with 0.1% trifluoroacetic acid in both constituents. Analytical and preparative separations employed a Phenomenex Jupiter 4 $\mu$  Proteo 90A (250  $\times$  4.6 mm) column at 1 mL/min and a Phenomenex Jupiter 4 $\mu$  Proteo 90A (250  $\times$  15 mm) at 8 mL/min, respectively.

**ITC analysis:** ITC experiments were performed using a MicroCal ITC200 instrument at 25  $^\circ\text{C}$ . Solutions of 275  $\mu\text{M}$  ligand were titrated into 18-20  $\mu\text{M}$  solutions of SH3 domain. Heats of dilution were measured independently for each experiment by titrating the ligand solution into buffer (20 mM phosphate buffer, pH 7.0, 150 mM NaCl, 1 mM EDTA). The linear regression for the heat of dilution and the observed baseline were subtracted from the raw data. The experimental data were fit in Origin (MicroCal) using a one set of sites binding model minimizing the residual sum of squared deviations.

**Computational docking and model building:** Docking was performed using the GOLD program (v. 5.7.2, CSD-Discovery suite). Docking was conducted assuming protonation at both basic nitrogens of the ligand **4.2**, and the GOLD program found 10 low-energy docked structures. A promising candidate was used as a starting point to build a two-point binding model: the ligand was locked in place except for the 3-carbon alkyl linker. Manual manipulation of the linker torsional angles (Swiss PDB Viewer) was then used to build a reasonable binding model based on the docked structure.

## Chemical synthesis

### *N*-(4-bromophenyl)cinnamamide (**6**)

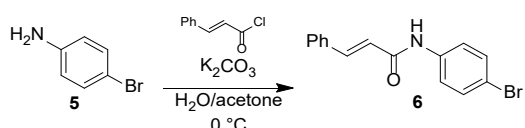

The procedure was adapted from the literature.<sup>5</sup> A 500-mL round-bottom flask was charged with 4-bromoaniline, **5**, (5.3 g, 31 mmol), water (70 mL), and potassium carbonate (60.0 g, 434 mmol). The mixture was gently heated to dissolve the solid then held at  $0\text{ }^\circ\text{C}$ . With stirring, a solution of cinnamoyl chloride in acetone (7.1 g, 43 mmol in 25 mL) was added dropwise by addition funnel over 30 min. The flask was placed in the freezer for 30 min to precipitate the product. The mixture was filtered on a glass frit, washed with cold water (20 mL) and cold diethyl ether (15 mL), and dried under vacuum to afford the product as a white powder (9.2 g, 99%). Spectral data was consistent with that previously reported.<sup>6</sup>  $^1\text{H}$  NMR (500 MHz,  $\text{DMSO-d}_6$ )  $\delta$  10.37 (s, 1H), 7.70–7.66 (m, 2H), 7.65–7.63 (m, 2H), 7.61 (d, 1H,  $J = 15.7$  Hz), 7.48–7.40 (m, 3H), 6.81 (d, 1H,  $J = 15.7$  Hz).  $^{13}\text{C}$  NMR (125 MHz,  $\text{DMSO-d}_6$ )  $\delta$  163.7, 140.6, 138.6, 134.6, 131.6, 129.9, 129.1, 127.8, 121.9, 121.1, 115.0. GC–MS,  $m/z$ : calculated for  $\text{C}_{15}\text{H}_{12}\text{BrNO}^+$  [ $\text{M}^+$ ]<sup>+</sup> 303.0, found 302.9.

### 6-bromoquinolin-2(1H)-one (**7**)

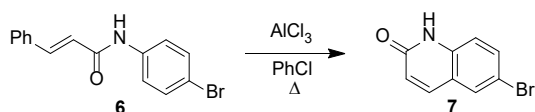

The procedure was adapted from the literature.<sup>5</sup> A 500-mL round-bottom flask was charged with amide **6** (9.2 g, 30 mmol), chlorobenzene (150 mL), and aluminum chloride (24.3 g, 182 mmol). The flask was fitted with a reflux condenser, and the solution was heated at reflux, quickly turning yellow to black. After 2 h, the mixture was concentrated by rotary evaporation to  $\sim 65$  mL, then poured onto ice (900 mL). The reaction flask was rinsed with water, and the resulting aqueous suspension was filtered on a glass frit. The solid was

dried under vacuum to afford the product as a light orange solid (3.75 g, 55%). Spectral data were consistent with that previously reported.<sup>7</sup> <sup>1</sup>H NMR (400 MHz, DMSO-*d*<sub>6</sub>) δ 11.87 (br s, 1H), 7.91 (d, 1H, *J* = 2.3 Hz), 7.87 (d, 1H, *J* = 9.6 Hz), 7.63 (dd, 1H, *J* = 8.7, 2.3 Hz), 7.24 (d, 1H, *J* = 8.8 Hz), 6.55 (d, 1H, *J* = 9.6 Hz). <sup>13</sup>C NMR (125 MHz, DMSO-*d*<sub>6</sub>) δ 161.7, 139.2, 138.0, 132.9, 129.9, 123.2, 120.9, 117.3, 113.4, 39.5. GC–MS, *m/z*: calculated for C<sub>9</sub>H<sub>6</sub>BrNO<sup>+</sup> [*M*]<sup>+</sup> 223.0, found 222.9.

### 6-bromo-2-chloroquinoline (8)

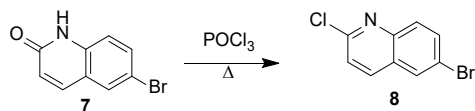

The procedure was adapted from the literature.<sup>5</sup> To a 500-mL round-bottom flask charged with phosphoryl chloride (20.5 g), lactam **7** (1.50 g, 6.69 mmol) was slowly added. The mixture was refluxed for 75 min, then cooled to rt and quenched by slowly pouring the solution onto ice. The flask was rinsed with cold water, and the precipitate was collected on a glass frit and washed with cold water. The solid was dried under vacuum to afford the product as an orange solid (1.62 g, 100%). Spectral data were consistent with that previously reported.<sup>8</sup> <sup>1</sup>H NMR (500 MHz, CDCl<sub>3</sub>) δ 8.02 (ddd, 1H, *J* = 8.6, 0.7, 0.4 Hz), 7.98 (d, 1H, *J* = 2.2 Hz), 7.89 (dt, 1H, *J* = 9, 0.6 Hz), 7.80 (dd, 1H, *J* = 9, 2.2 Hz), 7.41 (d, 1H, *J* = 8.6 Hz). <sup>13</sup>C NMR (125 MHz, CDCl<sub>3</sub>) δ 151.1, 146.4, 137.7, 134.0, 130.3, 129.63, 127.9, 123.3, 120.9. GC–MS, *m/z*: calculated for C<sub>9</sub>H<sub>5</sub>BrClN<sup>+</sup> [*M*]<sup>+</sup> 242.9, found 243.0.

### tert-butyl 4-(2-chloroquinolin-6-yl)piperazine-1-carboxylate (9)

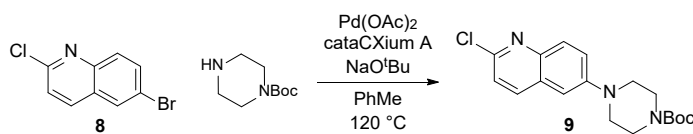

The procedure was adapted from the literature.<sup>5</sup> To a 4-mL vial, charged with bromide **8** (200 mg, 825 μmol), *N*-Boc-piperazine (154 mg, 825 μmol), Pd(OAc)<sub>2</sub> (3.6 mg, 16 μmol), and cataCXium<sup>®</sup> A (11.8 mg, 33 μmol) and equipped with a magnetic stir bar under nitrogen, was added sodium *tert*-butoxide (95 mg, 990 μmol) and toluene (1 mL). The vial was sealed and stirred at 120 °C in an aluminum heating block for 24 h. Upon cooling, the mixture was extracted with ethyl acetate, the combined organic phases were washed with brine, dried over sodium sulfate, filtered, and concentrated by rotary evaporation. Purification on silica gel column (Et<sub>2</sub>O/hexanes, 20→50% v/v) afforded the product as a yellow-orange solid (126 mg, 44% yield). Spectral data were consistent with that previously reported.<sup>5</sup> <sup>1</sup>H NMR (500 MHz, CDCl<sub>3</sub>) δ 7.93 (d, 1H, *J* = 8.6 Hz), 7.89 (d, 1H, *J* = 9.3 Hz), 7.48 (dd, 1H, *J* = 9.3, 2.7 Hz), 7.29 (d, 1H, *J* = 8.6 Hz), 7.01 (d, 1H, *J* = 2.7 Hz), 3.66–3.61 (m, 4H), 3.28–3.24 (m, 4H), 1.50 (s, 9H). <sup>13</sup>C NMR (125 MHz, CDCl<sub>3</sub>) δ 154.6,

149.5, 147.8, 143.3, 137.5, 129.3, 127.9, 123.4, 122.5, 109.4, 80.1, 49.1, 28.4. GC–MS, m/z: calculated for  $C_{18}H_{22}ClN_3O_2$   $[M]^+$  347.1, found 347.2.

### tert-butyl 4-(2-aminoquinolin-6-yl)piperazine-1-carboxylate (10)

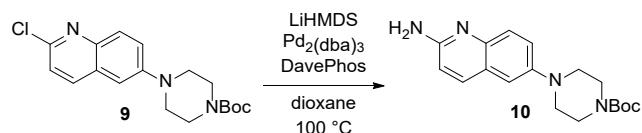

The procedure was adapted from the literature.<sup>5</sup> To a 4-mL vial, charged with chloride **9** (45 mg, 129  $\mu$ mol), Pd<sub>2</sub>(dba)<sub>3</sub> (1.8 mg, 1.9  $\mu$ mol), and DavePhos (1.5 mg, 3.9  $\mu$ mol) and equipped with a magnetic stir bar under nitrogen, was added anhydrous dioxane (1.5 mL). The vial was sealed, and lithium bis(trimethylsilyl)amide (1.0 M in tetrahydrofuran, 170  $\mu$ L) was added via syringe. The vial was stirred at 100 °C in an aluminum heating block for 20 h. Upon cooling, the mixture was quenched with 5 drops of 2.0 M hydrochloric acid, stirred for 10 minutes, then adjusted to pH 12 with 1.0 M potassium hydroxide. The mixture was then extracted with methylene chloride, washed with brine, dried over sodium sulfate, filtered, and concentrated by rotary evaporation. Purification on silica gel column (methanol/methylene chloride/triethylamine, 5:94:1  $\rightarrow$  15:84:1 v/v) afforded the product as a yellow-orange solid (32 mg, 73% yield). Spectral data were consistent with that previously reported.<sup>5</sup> <sup>1</sup>H NMR (500 MHz, CDCl<sub>3</sub>)  $\delta$  7.79 (d, 1H,  $J$  = 8.7 Hz), 7.60 (d, 1H,  $J$  = 9.1 Hz), 7.35 (dd, 1H,  $J$  = 9.2, 2.8 Hz), 6.98 (d, 1H,  $J$  = 2.7 Hz), 6.70 (d, 1H,  $J$  = 8.8 Hz), 4.78 (br s, 2H), 3.65–3.60 (m, 4H), 3.18–3.13 (m, 4H), 1.49 (s, 9H). GC–MS, m/z: calculated for  $C_{18}H_{24}N_4O_2$   $[M]^+$  328.2, found 328.2.

### 6-(piperazin-1-yl)quinolin-2-amine (11)

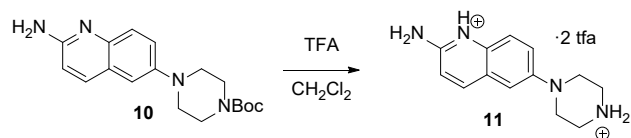

A scintillation vial was charged with Boc-amine **10** (260 mg, 792  $\mu$ mol), trifluoroacetic acid (4.0 mL), and methylene chloride (4.0 mL) and equipped with a magnetic stir bar. After 4 h, starting material was consumed, and the mixture was concentrated by rotary evaporation, resuspended in toluene, and concentrated once more to obtain the pure bis(trifluoroacetate) salt as a dark yellow solid (350 mg, 97%). <sup>1</sup>H NMR (500 MHz, CD<sub>3</sub>OD)  $\delta$  8.26 (d, 1H,  $J$  = 9.4 Hz), 7.62–7.61 (m, 2H), 7.39 (t, 1H,  $J$  = 1.3 Hz), 7.03 (d, 1H,  $J$  = 9.4 Hz), 3.53–3.50 (m, 4H), 3.44–3.41 (m, 4H). <sup>13</sup>C NMR (150 MHz, CD<sub>3</sub>OD)  $\delta$  149.3, 144.5, 132.1, 125.6, 123.7, 119.3, 114.7, 114.4, 47.7, 44.7. GC–MS, m/z: calculated for  $C_{13}H_{16}N_4$   $[M]^+$  228.1, found 228.1.

### tert-butyl 2-(4-(2-aminoquinolin-6-yl)piperazin-1-yl)acetate (**12a**)

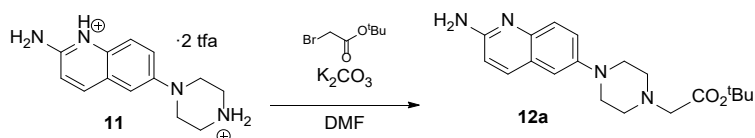

To a 4-mL vial was added the bis-TFA salt **11** (105 mg, 230  $\mu\text{mol}$ ), *tert*-butyl bromoacetate (37  $\mu\text{L}$ , 253  $\mu\text{mol}$ ), potassium carbonate (163 mg, 1.15 mmol), and dry *N,N*-dimethylformamide (1.0 mL). The vial was equipped with a magnetic stir bar and stirred at 40 °C for 16 h. The mixture was extracted with ethyl acetate, dried over sodium sulfate, filtered, and concentrated by rotary evaporation. Purification on silica gel column (ethyl acetate/hexanes/triethylamine, 80:19:1 $\rightarrow$ 99:0:1 v/v) afforded the product as a light orange solid (71 mg, 90% yield).  $^1\text{H}$  NMR (600 MHz,  $\text{CD}_3\text{OD}$ )  $\delta$  7.83 (d, 1H,  $J = 8.9$  Hz), 7.45 (d, 1H,  $J = 9.2$  Hz), 7.36 (dd, 1H,  $J = 9.2, 2.7$  Hz), 7.07 (d, 1H,  $J = 2.6$  Hz), 6.77 (d, 1H,  $J = 8.9$  Hz), 3.25–3.22 (m, 4H), 3.20 (s, 2H), 2.78–2.76 (m, 4H), 1.49 (s, 9H).  $^{13}\text{C}$  NMR (150 MHz,  $\text{CD}_3\text{OD}$ )  $\delta$  171.0, 158.3, 148.0, 143.5, 138.8, 126.2, 125.1, 124.0, 113.6, 112.8, 82.5, 60.7, 54.0, 50.9, 28.4. GC–MS,  $m/z$ : calculated for  $\text{C}_{19}\text{H}_{26}\text{N}_4\text{O}_2^+$   $[\text{M}]^+$  342.2, found 342.2.

### dirhodium ligation of 2-(4-(2-aminoquinolin-6-yl)piperazin-1-yl)acetic acid (**4a**)

Two steps:

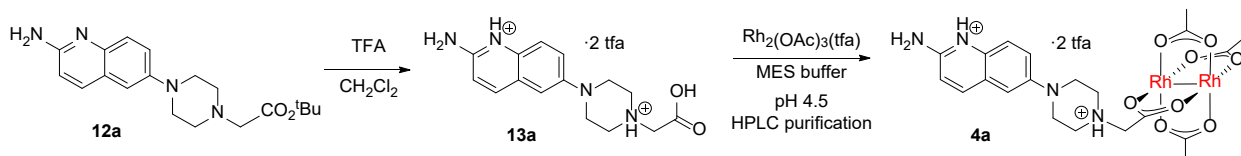

A 4-mL vial was charged with ester **12a** (8 mg, 23  $\mu\text{mol}$ ), trifluoroacetic acid (1 mL), and dry methylene chloride (1 mL) and equipped with a magnetic stir bar. After 3 h stirring at rt, the starting material was consumed, and the mixture was concentrated by rotary evaporation, resuspended in toluene, and concentrated once more to obtain the bis(trifluoroacetate) intermediate **13a** as a yellow solid (12 mg, 99% yield).  $^1\text{H}$  NMR (400 MHz,  $\text{CD}_3\text{OD}$ )  $\delta$  8.25 (d, 1H,  $J = 9.4$  Hz), 7.62 (s, 1H), 7.61 (s, 1H), 7.39 (s, 1H), 7.03 (d, 1H,  $J = 9.3$  Hz), 4.17 (s, 2H), 3.61 (br s, 8H). ESI–MS,  $m/z$ : calculated for  $\text{C}_{15}\text{H}_{19}\text{N}_4\text{O}_2$   $[\text{M}+\text{H}]^+$  287.2, found 287.0.

A 4-mL vial was charged with acid **13a** as the bis(trifluoroacetate) salt (2.0 mg, 3.9  $\mu\text{mol}$ ),  $\text{Rh}_2(\text{OAc})_3(\text{tfa})$  (4.2 mg, 8.7  $\mu\text{mol}$ ), and MES buffer (1.4 mL, 25 mg/mL, pH = 4.5) and equipped with a magnetic stir bar. The vial was stirred at rt, and the reaction was monitored by analytical HPLC. After 24 h, the mixture was purified by preparative HPLC. Fractions were combined, concentrated by rotary evaporation, and dried by

lyophilization to afford the product as the bis(trifluoroacetate) salt as a light green solid (3.0 mg, 86%). ESI-MS,  $m/z$ : calculated for  $C_{21}H_{27}N_4O_8Rh_2$   $[M+H]^+$  669.0, found 668.8.

#### 4-(4-(2-aminoquinolin-6-yl)piperazin-1-yl)butanoic acid (**13b**)

Two steps:

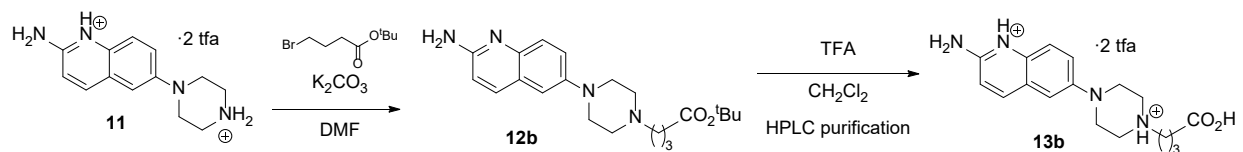

To a 4-mL vial was added the bis-TFA salt **11** (81 mg, 178  $\mu$ mol), *tert*-butyl 4-bromobutyrate (50 mg, 213  $\mu$ mol), potassium carbonate (120 mg, 888 mmol), and dry *N,N*-dimethylformamide (1.0 mL) and equipped with a magnetic stir bar. The vial was stirred at 40 °C for 16 h. The mixture was extracted with ethyl acetate, dried over sodium sulfate, filtered, and concentrated by rotary evaporation. Purification on silica gel column (methanol/methylene chloride/triethylamine, 0:99:1  $\rightarrow$  10:89:1 v/v) afforded the ester intermediate **12b** as a light orange solid (52 mg, 78%).  $^1H$  NMR (500 MHz,  $CD_3OD$ )  $\delta$  7.85 (d, 1H,  $J$  = 8.9 Hz), 7.45 (d, 1H,  $J$  = 9.2 Hz), 7.37 (dd, 1H,  $J$  = 9.2, 2.7 Hz), 7.08 (d, 1H,  $J$  = 2.7 Hz), 6.77 (d, 1H,  $J$  = 8.9 Hz), 3.24–3.21 (m, 4H), 2.70–2.66 (m, 4H), 2.47–2.42 (m, 2H), 2.30 (t, 2H,  $J$  = 7.3 Hz), 1.86–1.79 (m, 2H), 1.46 (s, 9H).  $^{13}C$  NMR (125 MHz,  $CD_3OD$ )  $\delta$  174.5, 158.3, 148.0, 143.3, 138.9, 126.1, 125.1, 123.9, 113.6, 112.8, 81.5, 58.8, 54.3, 51.0, 34.2, 28.4, 23.0.

A 4-mL vial was charged with ester **12b** (24 mg, 60  $\mu$ mol), trifluoroacetic acid (0.5 mL), and dry methylene chloride (0.5 mL) and equipped with a magnetic stir bar. After stirring at rt for 4.5 h, the starting material was consumed, and the mixture was concentrated by rotary evaporation. Purification was performed by preparative HPLC. Fractions were combined, concentrated by rotary evaporation, and dried by lyophilization to obtain the pure bis(trifluoroacetate) salt as a yellow solid (12 mg, 38%).  $^1H$  NMR (600 MHz,  $CD_3OD$ )  $\delta$  8.25 (d, 1H,  $J$  = 9.4 Hz), 7.63–7.61 (m, 2H), 7.38 (d, 1H,  $J$  = 2.0 Hz), 7.03 (d, 1H,  $J$  = 9.4 Hz), 3.53 (br s, 1H), 3.30–3.27 (m, 2H), 2.50 (t, 2H,  $J$  = 6.9 Hz), 2.11–2.05 (m, 2H).  $^{13}C$  NMR (150 MHz,  $CD_3OD$ )  $\delta$  175.8, 155.2, 148.8, 144.5, 132.1, 125.5, 123.7, 119.4, 114.8, 114.4, 57.4, 53.0, 47.9, 31.4, 20.4. ESI-MS,  $m/z$ : calculated for  $C_{17}H_{23}N_4O_2$   $[M+H]^+$  315.2, found 315.1.

### dirhodium ligation of 4-(4-(2-aminoquinolin-6-yl)piperazin-1-yl)butanoic acid (**4b**)

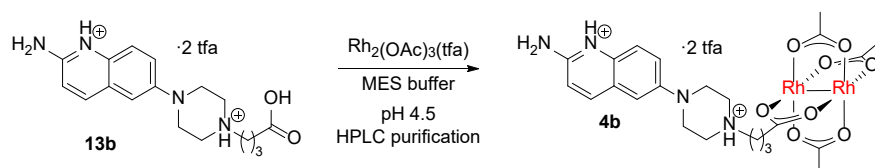

A 4-mL vial was charged with acid **13b** as the bis(trifluoroacetate) salt (3.3 mg, 6.1  $\mu\text{mol}$ ),  $\text{Rh}_2(\text{OAc})_3(\text{tfa})$  (6.3 mg, 9.1  $\mu\text{mol}$ ), and MES buffer (1.2 mL, 25 mg/mL, pH = 4.5) and equipped with a magnetic stir bar. The vial was stirred at 40 °C and monitored by analytical HPLC. After 24 h, the mixture was purified by preparative HPLC. Fractions were combined, concentrated by rotary evaporation, and dried by lyophilization to afford the product as the bis(trifluoroacetate) salt as a light green solid (5.5 mg, 98%). ESI-MS,  $m/z$ : calculated for  $\text{C}_{23}\text{H}_{31}\text{N}_4\text{O}_8\text{Rh}_2$   $[\text{M}+\text{H}]^+$  697.0, found 696.8; calculated for  $[\text{M}+2\text{H}]^{2+}$  349.0, found 348.9; calculated for  $[\text{M}+2\text{H}+\text{MeOH}]^{2+}$  365.0, found 364.9.

### 6-(4-(2-aminoquinolin-6-yl)piperazin-1-yl)hexanoic acid (**13c**)

Two steps:

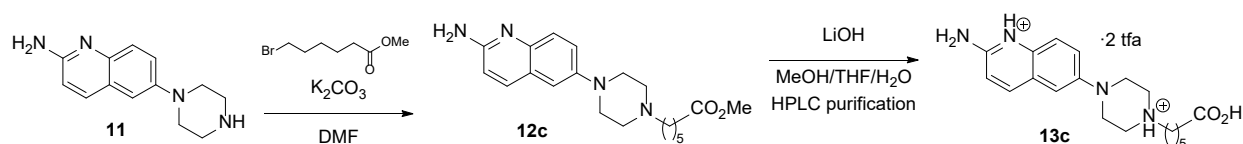

A 4-mL vial was charged with **11** as the free amine (55 mg, 240  $\mu\text{mol}$ ), methyl 6-bromohexanoate (64 mg, 290  $\mu\text{mol}$ ), potassium carbonate (167 mg, 1.21 mmol), and dry *N,N*-dimethylformamide (1.0 mL) and equipped with a magnetic stir bar. After 25 h stirring at rt, *N,N*-diisopropylethylamine (42  $\mu\text{L}$ , 240  $\mu\text{mol}$ ) was added to speed the reaction. After an additional 19 h, 6-bromohexanoate (30 mg, 140  $\mu\text{mol}$ ) was added. After 3 h, the mixture was extracted with ethyl acetate, dried over sodium sulfate, filtered, and concentrated by rotary evaporation. Purification on silica gel column (methanol/ethyl acetate/hexanes/triethylamine, 0:80:19:1→0:99:0:1→2:97:0:1 v/v) afforded the ester intermediate **12c** as a light orange solid (42 mg, 30%).  $^1\text{H}$  NMR (600 MHz,  $\text{CD}_3\text{OD}$ )  $\delta$  7.85 (d, 1H,  $J = 8.9$  Hz), 7.46 (d, 1H,  $J = 9.2$  Hz), 7.38 (dd, 1H,  $J = 9.2, 2.7$  Hz), 7.08 (d, 1H,  $J = 2.7$  Hz), 6.78 (d, 1H,  $J = 8.9$  Hz), 3.66 (s, 3H), 3.25–3.22 (m, 4H), 2.71–2.67 (m, 4H), 2.47–2.43 (m, 2H), 2.36 (t, 2H,  $J = 7.4$  Hz), 1.70–1.63 (m, 2H), 1.63–1.56 (m, 2H), 1.41–1.35 (m, 2H).  $^{13}\text{C}$  NMR (150 MHz,  $\text{CD}_3\text{OD}$ )  $\delta$  175.9, 158.3, 148.0, 143.3, 138.9, 126.1, 125.1, 123.9, 113.6, 112.8, 59.5, 54.3, 52.0, 50.9, 34.7, 28.1, 27.2, 25.9.

A 4-mL vial was charged with ester **12c** (20 mg, 56  $\mu\text{mol}$ ), lithium hydroxide (5.2 mg, 224  $\mu\text{mol}$ ), methanol (1.7 mL), water (0.5 mL), and tetrahydrofuran (0.2 mL) and equipped with a magnetic stir bar. After stirring



at 40 °C for 20 h, the starting material was consumed, and the mixture was dried under a gentle stream of nitrogen, resuspended in methanol, and filtered. Purification was performed by preparative HPLC. Fractions were combined, concentrated by rotary evaporation, and dried by lyophilization to obtain the pure bis(trifluoroacetate) salt as a yellow solid (9.0 mg, 28%). <sup>1</sup>H NMR (600 MHz, CD<sub>3</sub>OD) δ 8.26 (d, 1H, *J* = 9.4 Hz), 7.62 (d, 2H, *J* = 1.3 Hz), 7.39 (s, 1H), 7.04 (d, 1H, *J* = 9.4 Hz), 3.51 (br s, 8H), 3.26–3.21 (m, 2H), 2.36 (t, 2H, *J* = 7.3 Hz), 1.86–1.79 (m, 2H), 1.73–1.67 (m, 2H), 1.51–1.44 (m, 2H). <sup>13</sup>C NMR (150 MHz, CD<sub>3</sub>OD) δ 177.2, 155.1, 148.8, 144.5, 132.1, 125.5, 123.7, 119.4, 114.8, 114.4, 57.8, 52.9, 47.8, 34.4, 27.0, 25.3, 24.8. ESI–MS, *m/z*: calculated for C<sub>19</sub>H<sub>27</sub>N<sub>4</sub>O<sub>2</sub> [M+H]<sup>+</sup> 343.2, found 343.1.

### dirhodium ligation of 6-(4-(2-aminoquinolin-6-yl)piperazin-1-yl)hexanoic acid (**4c**)

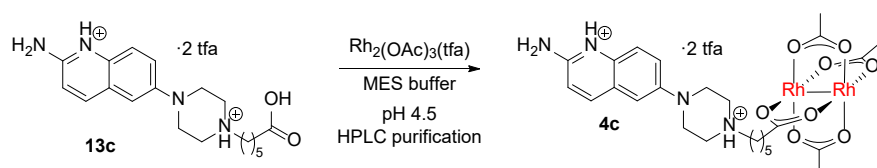

A 4-mL vial was charged with acid **13c** as the bis(trifluoroacetate) salt (3.2 mg, 5.6 μmol), Rh<sub>2</sub>(OAc)<sub>3</sub>(tfa) (4.2 mg, 8.4 μmol), and MES buffer (1.2 mL, 25 mg/mL, pH = 4.5) and equipped with a magnetic stir bar. The vial was stirred at 40 °C, and the reaction was monitored by analytical HPLC. After 36 h, the mixture was purified by preparative HPLC. Fractions were combined, concentrated by rotary evaporation, and dried by lyophilization, to afford the product as the bis(trifluoroacetate) salt as a light green solid (5.1 mg, 95%). ESI–MS, *m/z*: calculated for C<sub>25</sub>H<sub>35</sub>N<sub>4</sub>O<sub>8</sub>Rh<sub>2</sub> [M+H]<sup>+</sup> 725.1, found 724.9; calculated for [M+2H]<sup>2+</sup> 363.0, found 362.9; calculated for [M+2H+MeOH]<sup>2+</sup> 379.0, found 378.9.

## Compound characterization

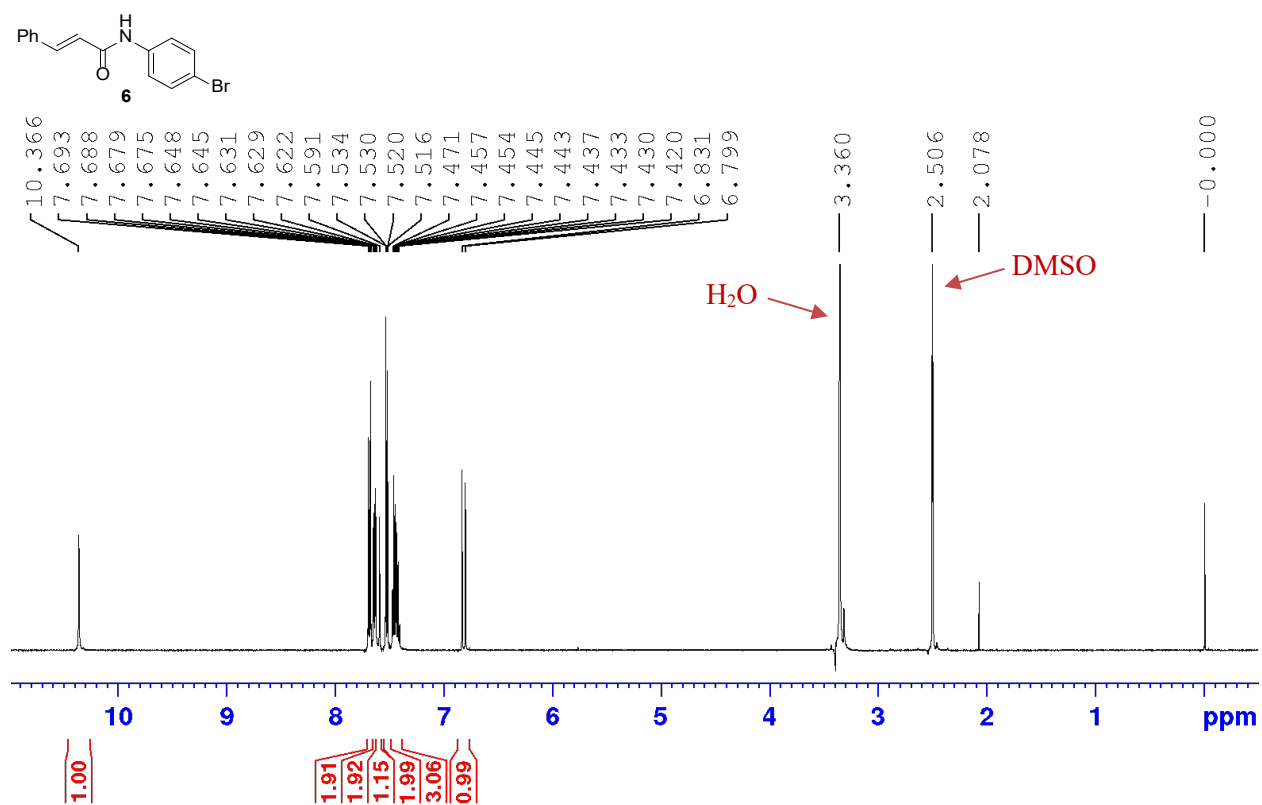

Figure 1. <sup>1</sup>H NMR spectrum of compound 6 in DMSO-d<sub>6</sub>.

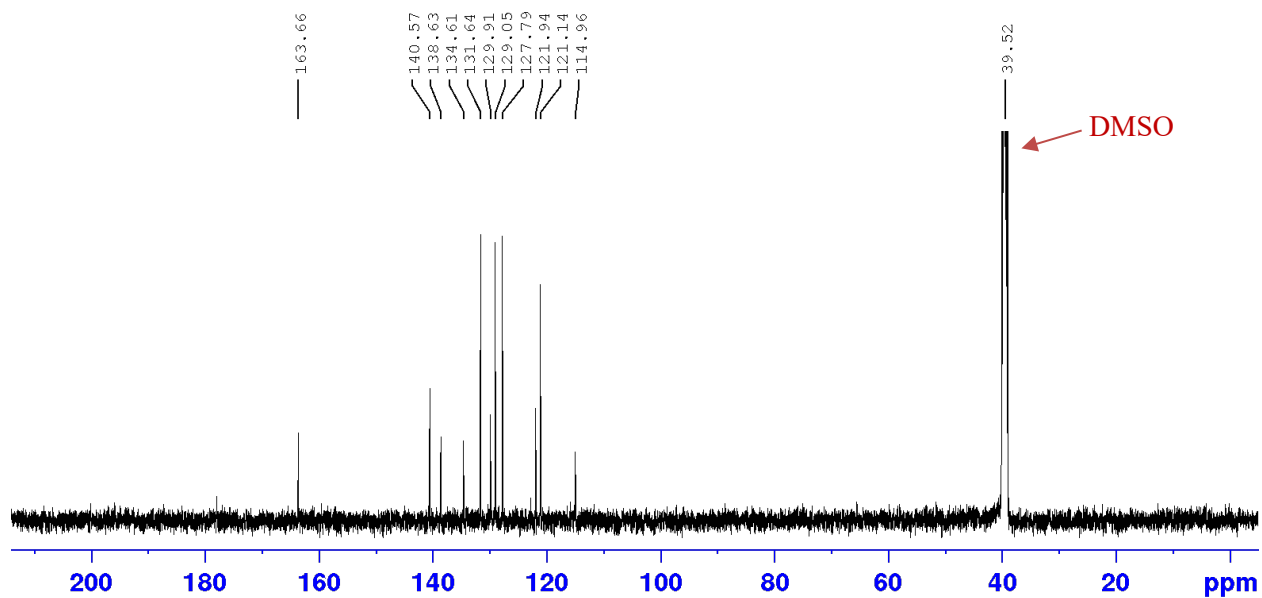

Figure 2. <sup>13</sup>C NMR spectrum of compound 6 in DMSO-d<sub>6</sub>.

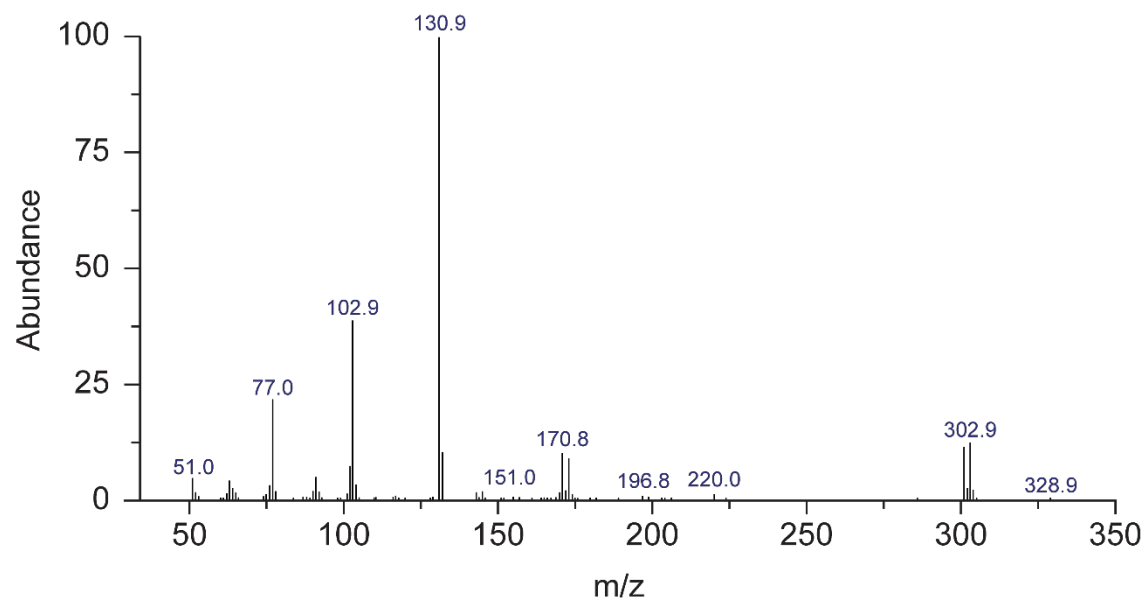

Figure 3. GC-MS spectrum of compound 6.

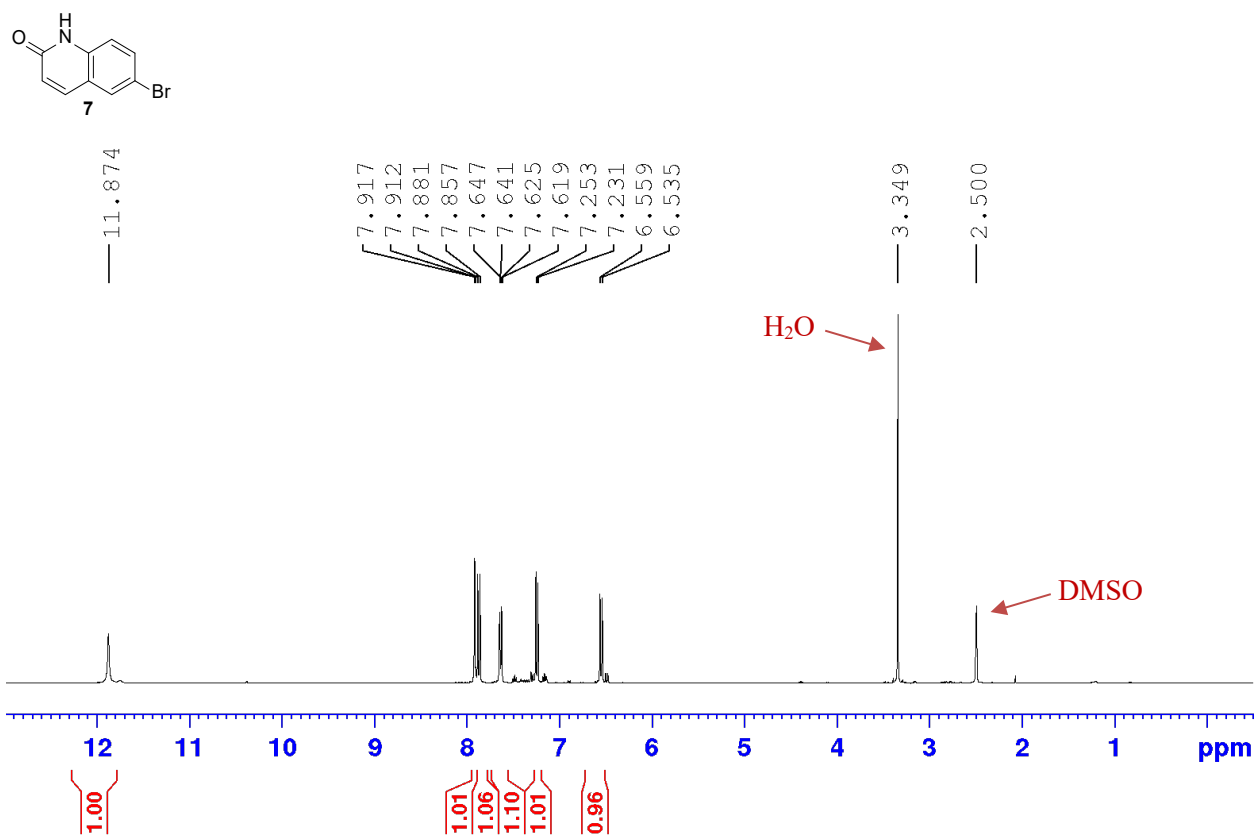

Figure 4. <sup>1</sup>H NMR spectrum of compound 7 in DMSO-d<sub>6</sub>.

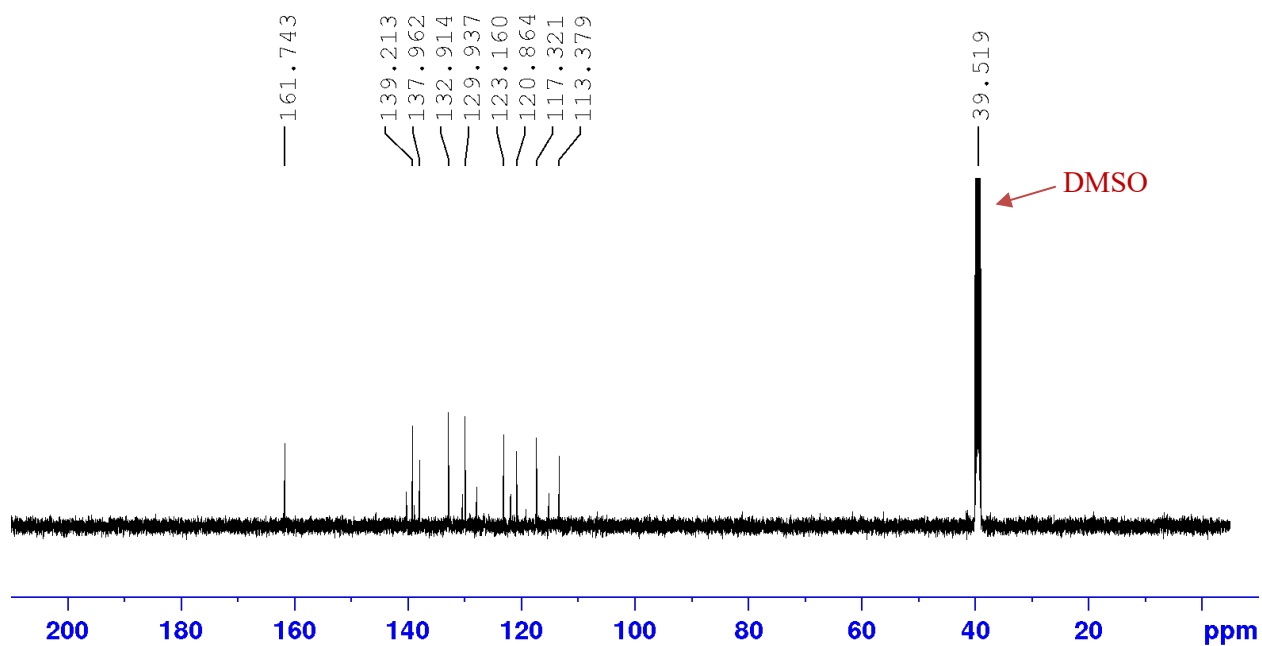

Figure 5. <sup>13</sup>C NMR spectrum of compound 7 in DMSO-d<sub>6</sub>.

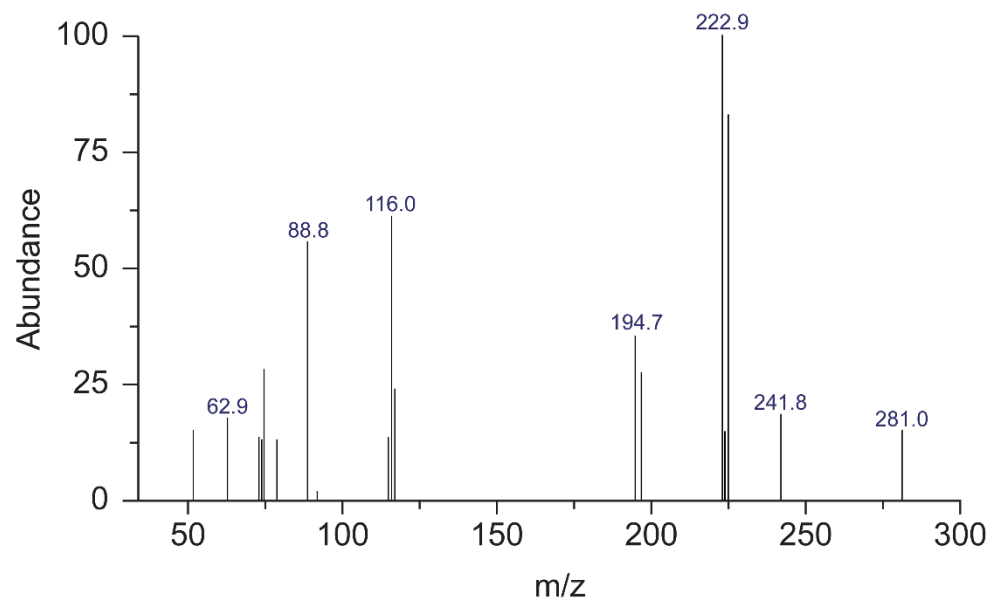

Figure 6. GC-MS spectrum of compound 7.

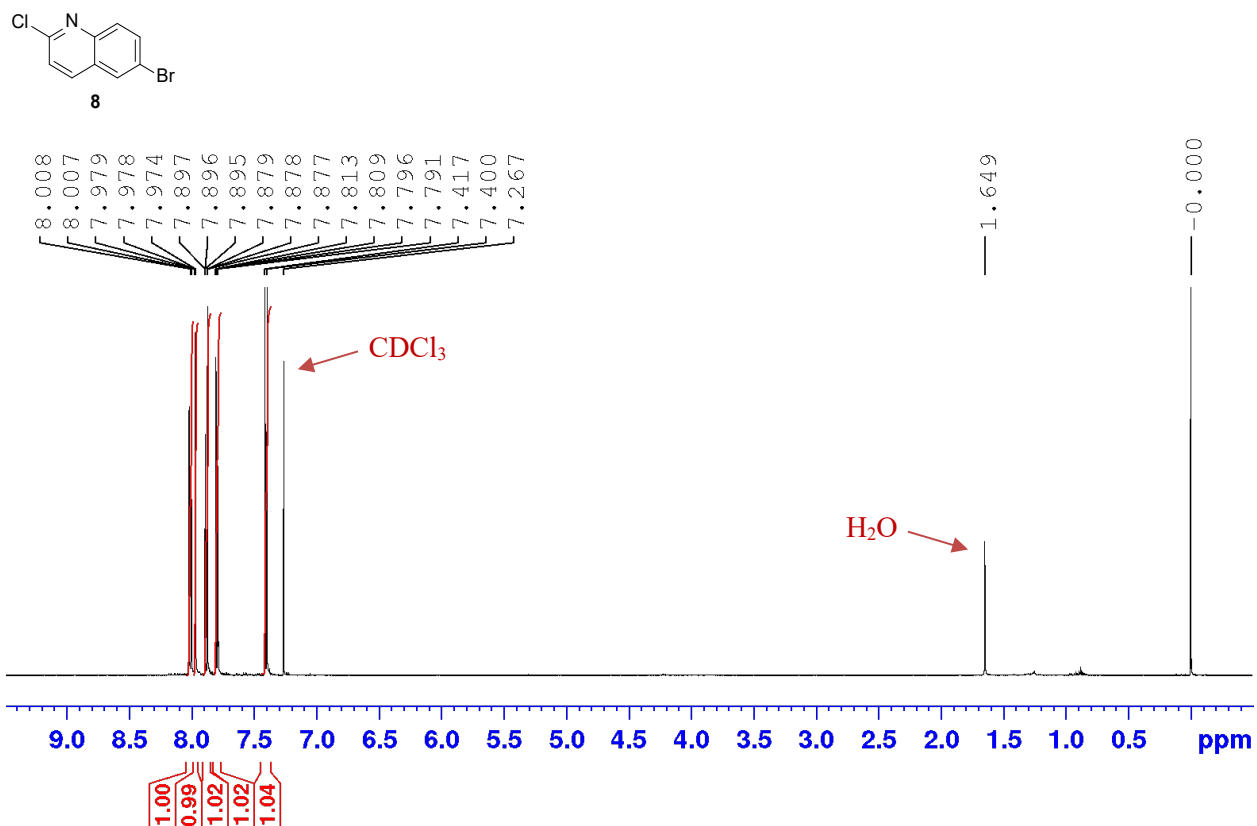

Figure 7. <sup>1</sup>H NMR spectrum of compound **8** in CDCl<sub>3</sub>.

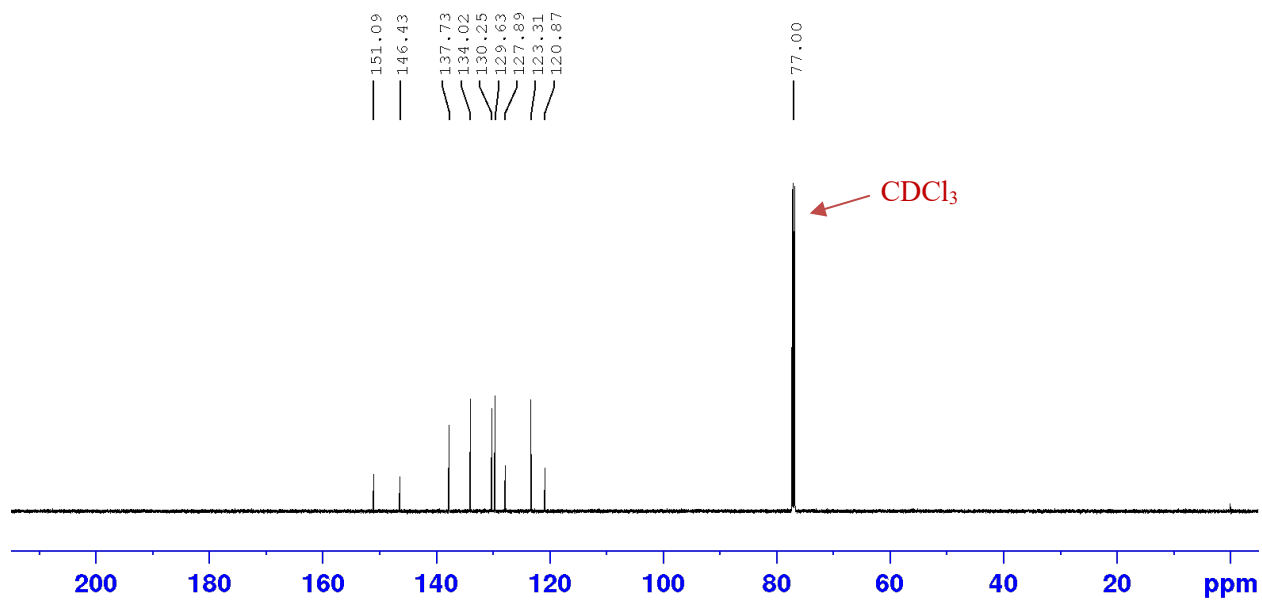

Figure 8. <sup>13</sup>C NMR spectrum of compound **8** in CDCl<sub>3</sub>.

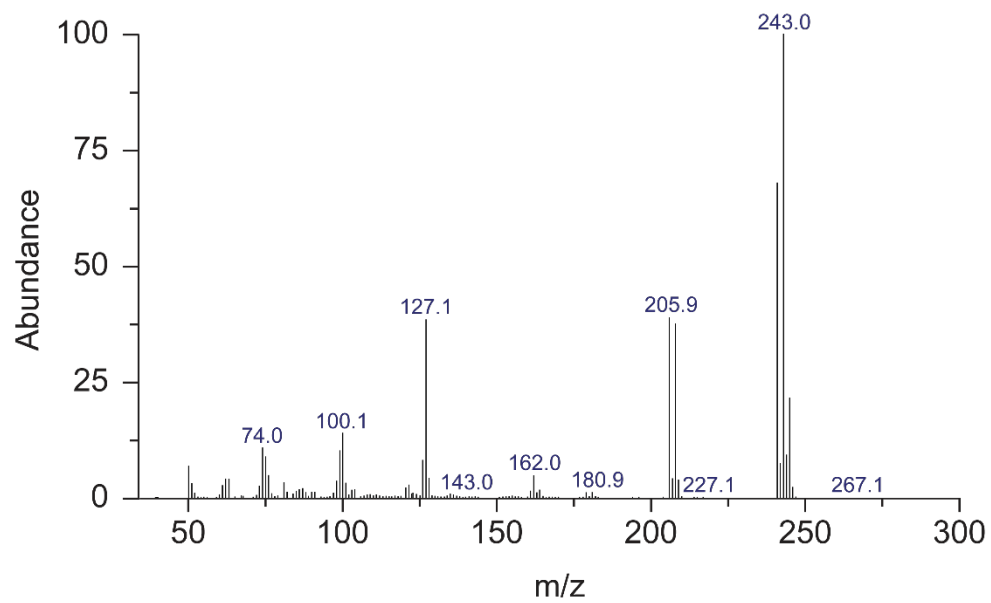

**Figure 9.** GC-MS spectrum of compound **8**.

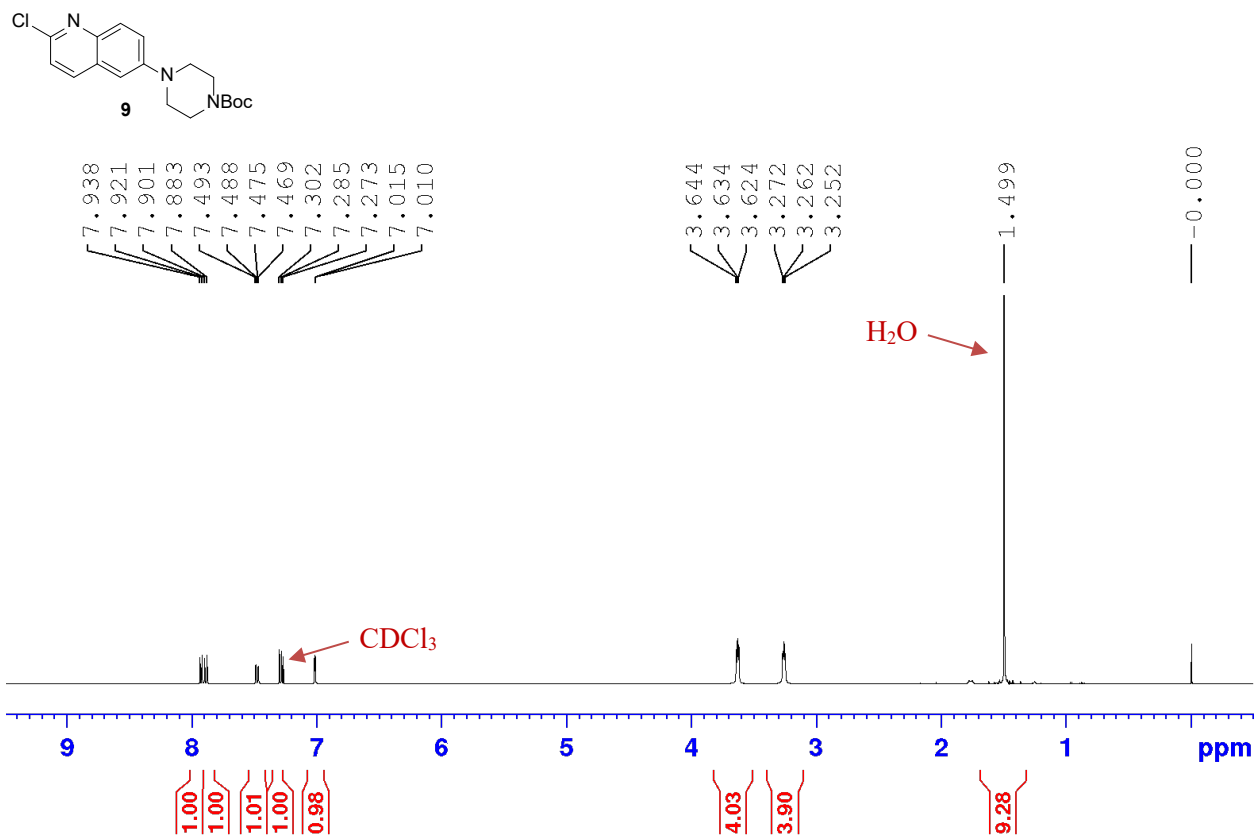

Figure 10. <sup>1</sup>H NMR spectrum of compound **9** in CDCl<sub>3</sub>.

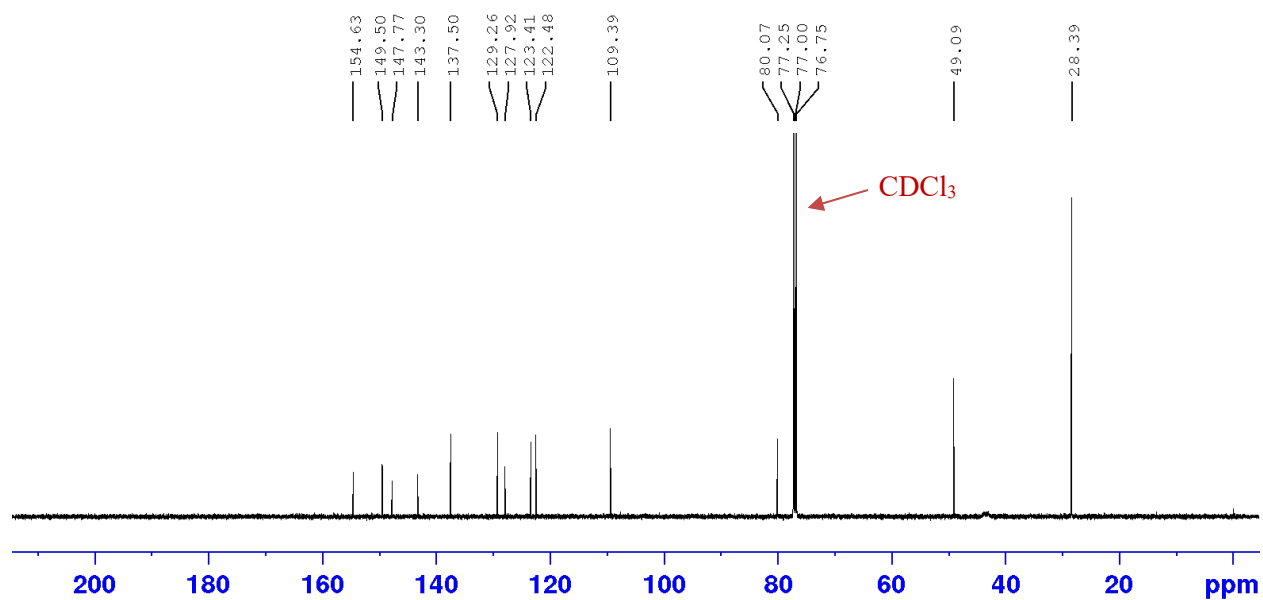

Figure 11. <sup>13</sup>C NMR spectrum of compound **9** in CDCl<sub>3</sub>.



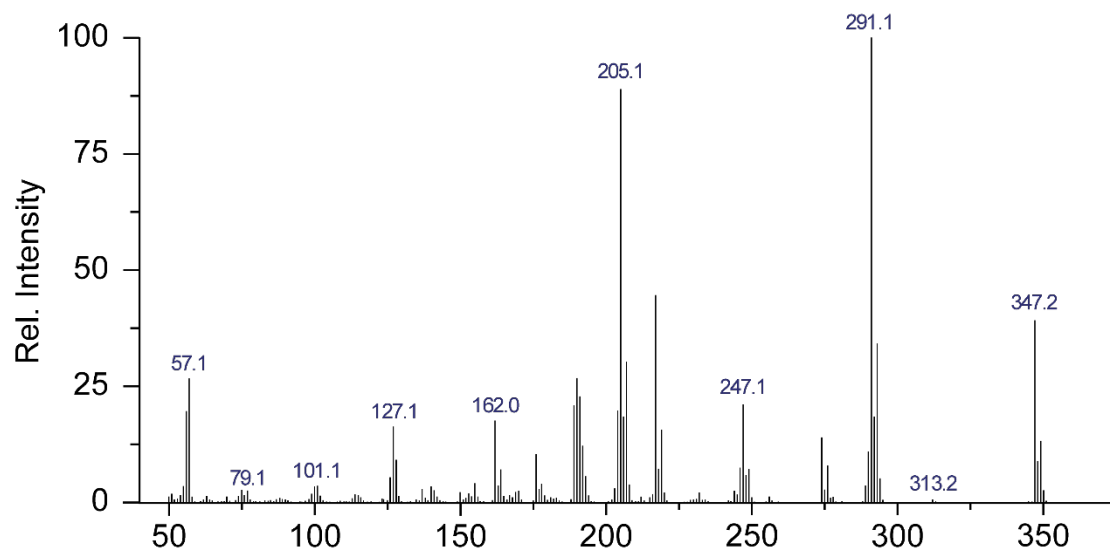

Figure 12. GC-MS spectrum of compound 9.

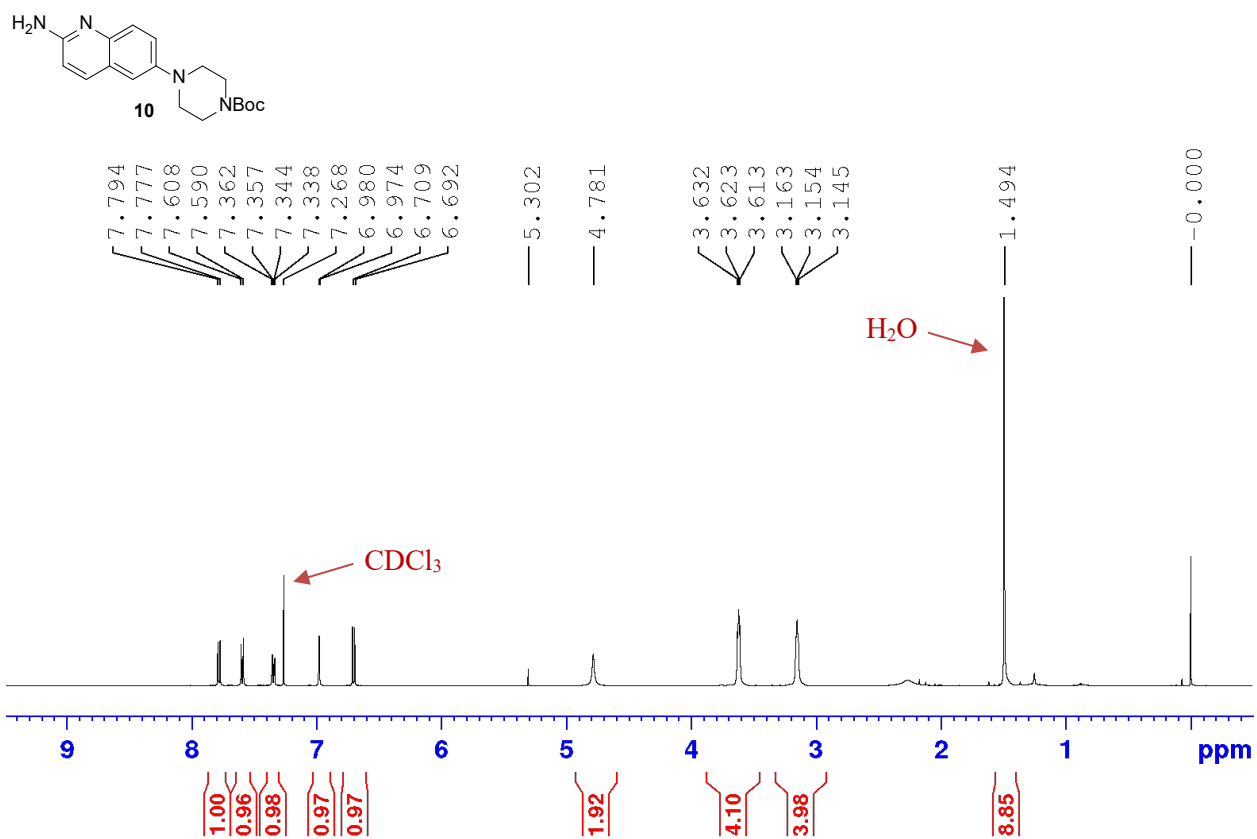

Figure 13. <sup>1</sup>H NMR spectrum of compound **10** in CDCl<sub>3</sub>.

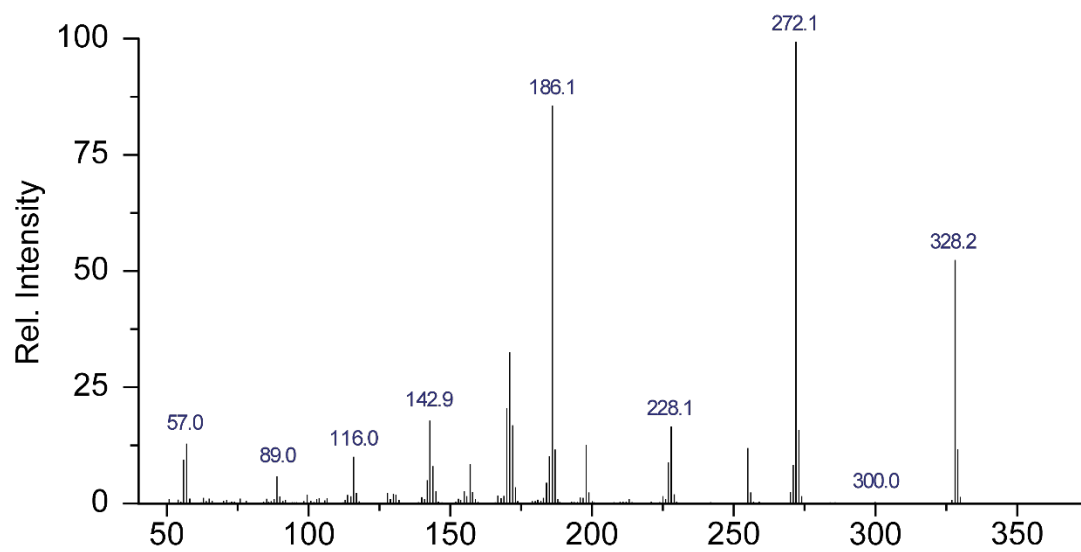

Figure 14. GC-MS spectrum of compound **10**.

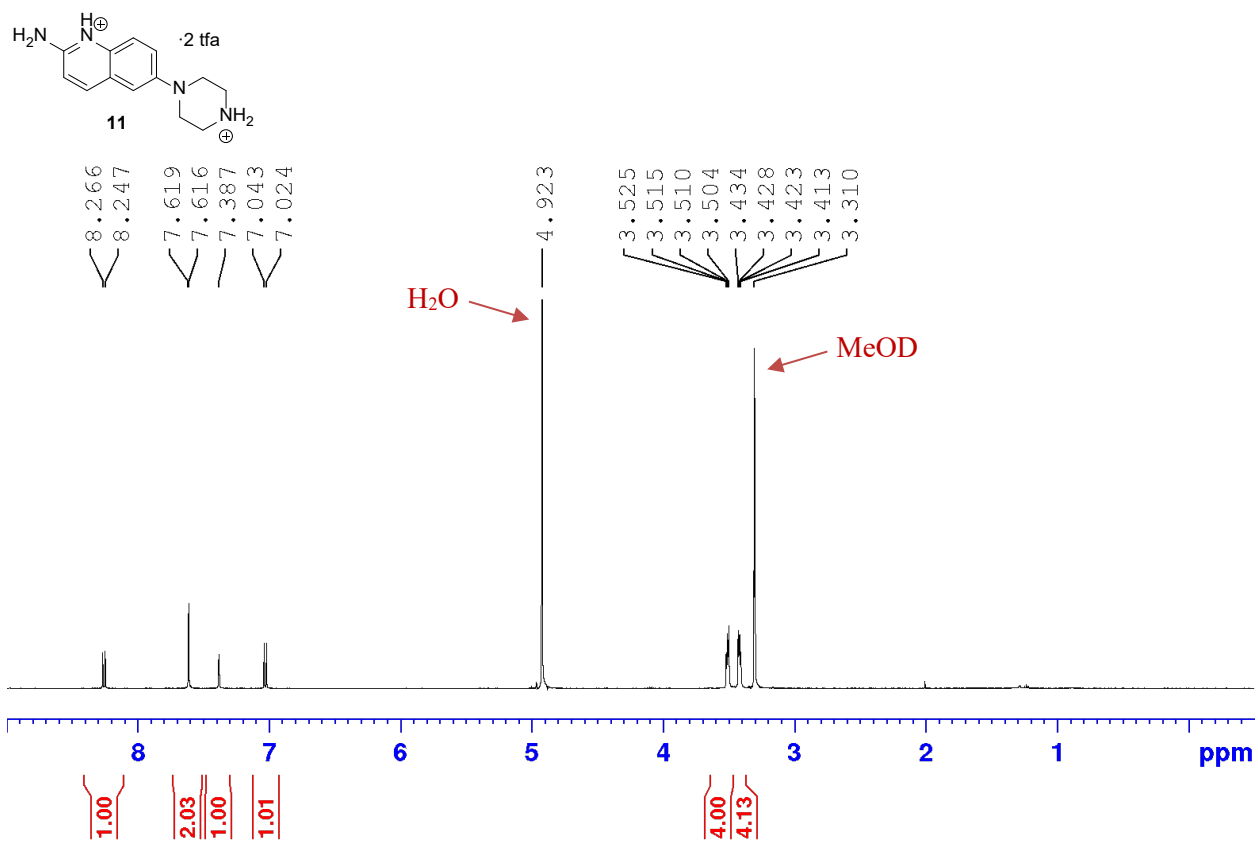

Figure 15. <sup>1</sup>H NMR spectrum of compound **11** in CD<sub>3</sub>OD.

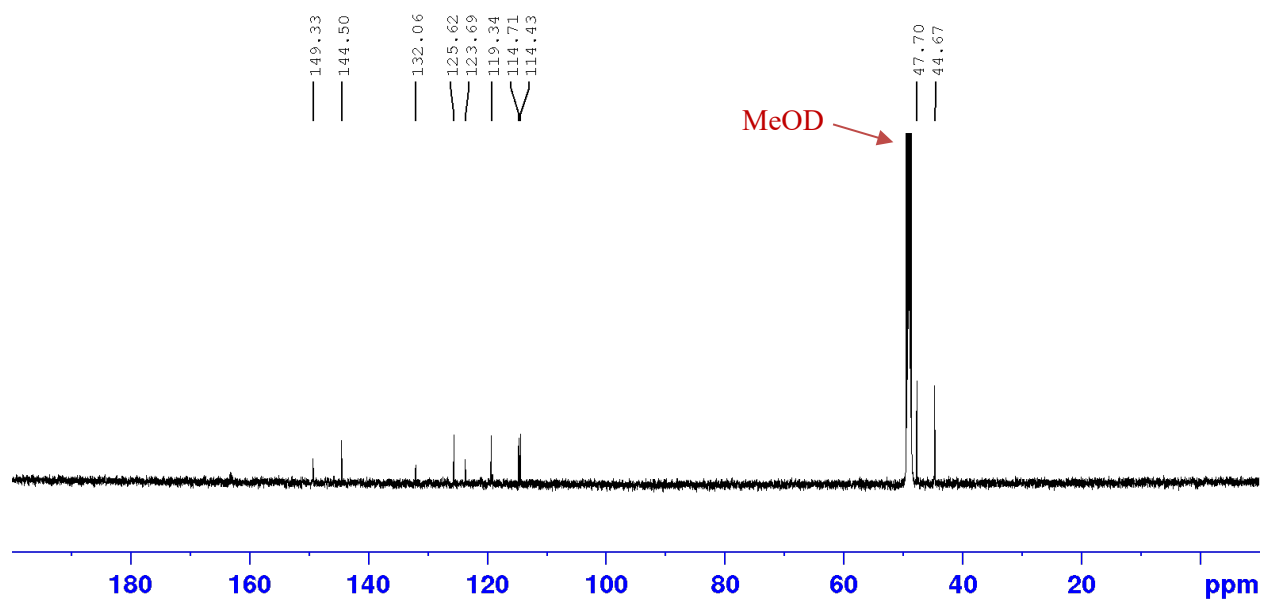

Figure 16. <sup>13</sup>C NMR spectrum of compound **11** in CD<sub>3</sub>OD.

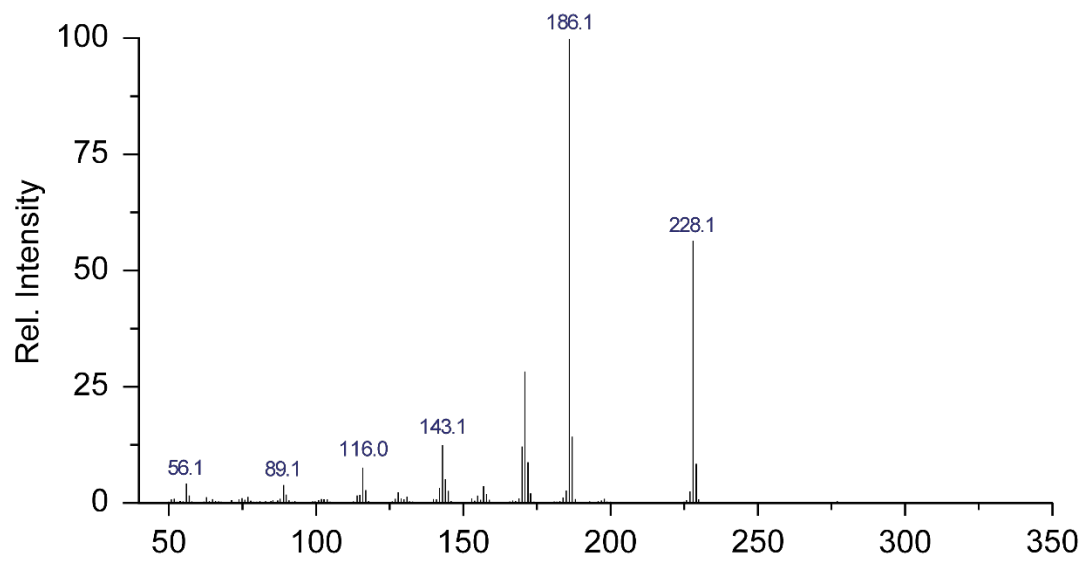

Figure 17. GC-MS spectrum of compound **11**.

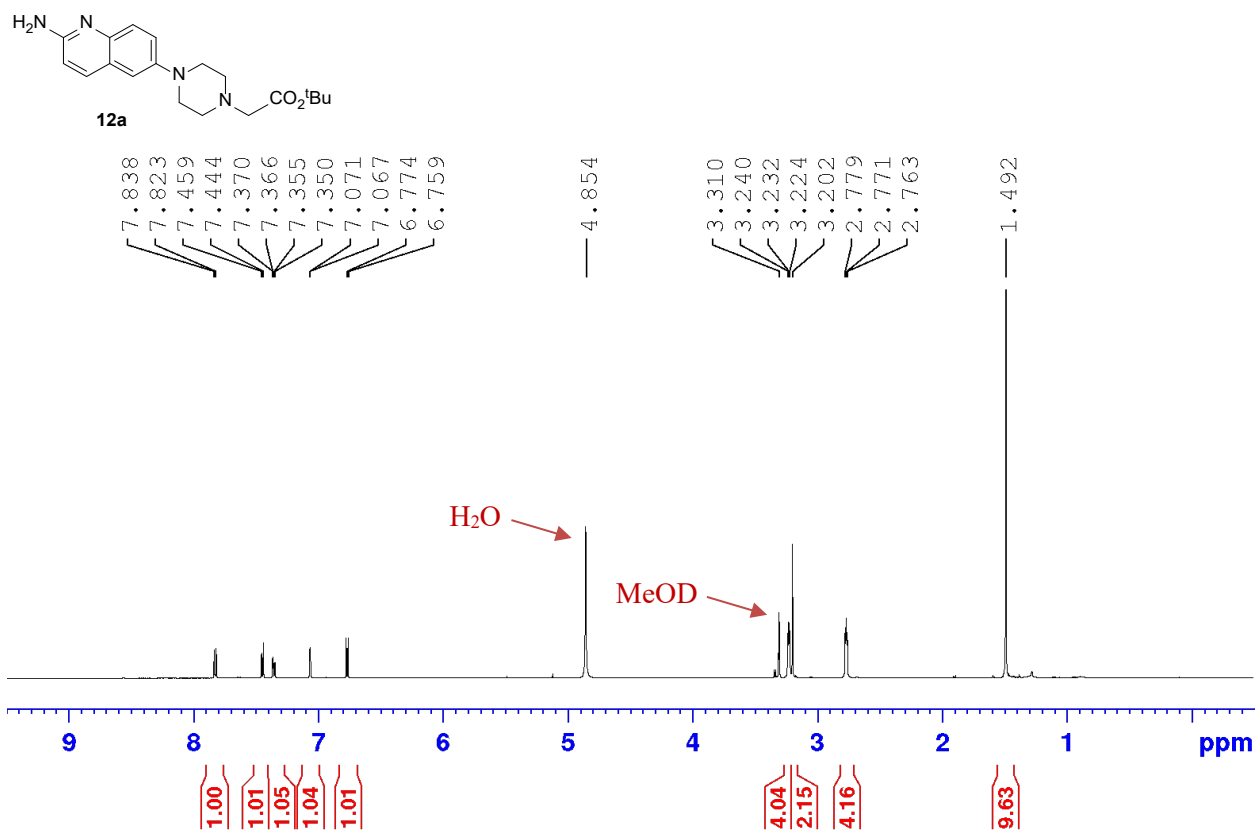

**Figure 18.**  $^1\text{H}$  NMR spectrum of compound **12a** in  $\text{CD}_3\text{OD}$ .

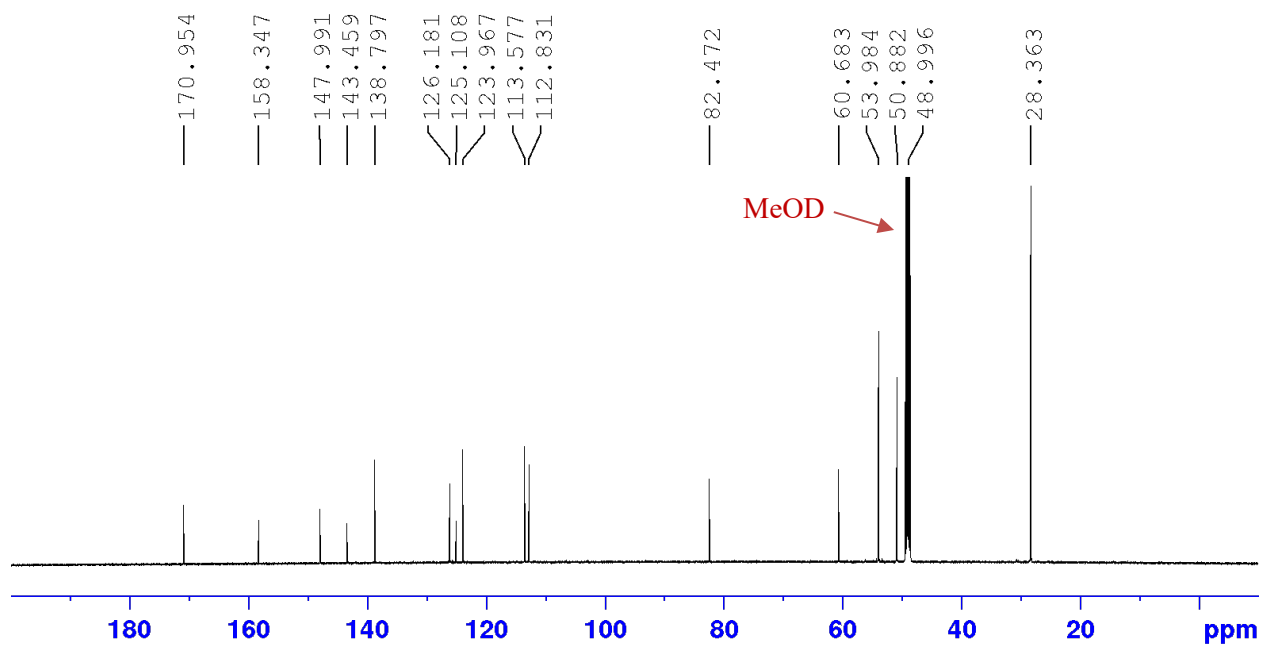

**Figure 19.**  $^{13}\text{C}$  NMR spectrum of compound **12a** in  $\text{CD}_3\text{OD}$ .

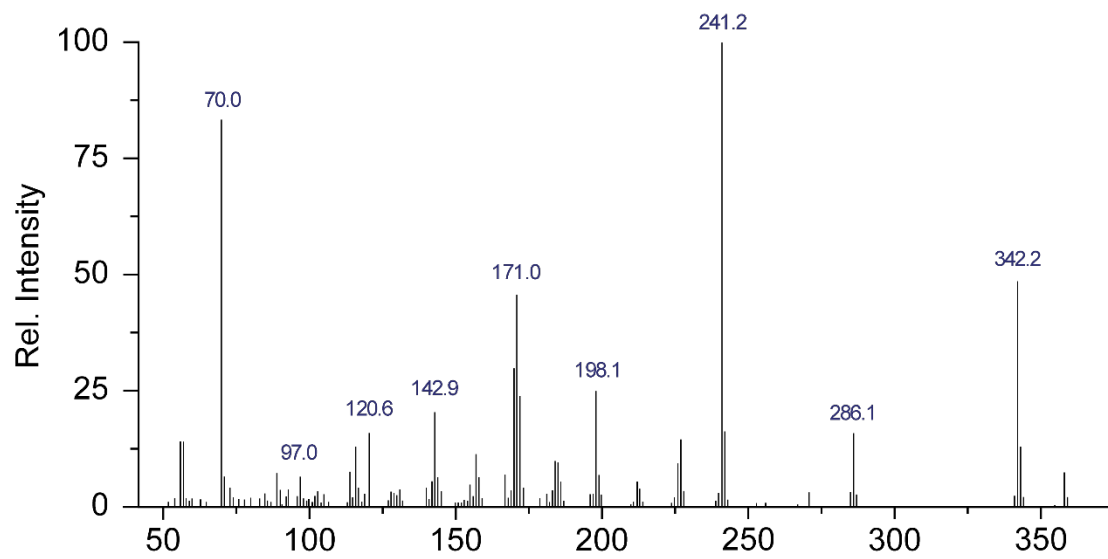

Figure 20. GC-MS spectrum of compound **12a**.

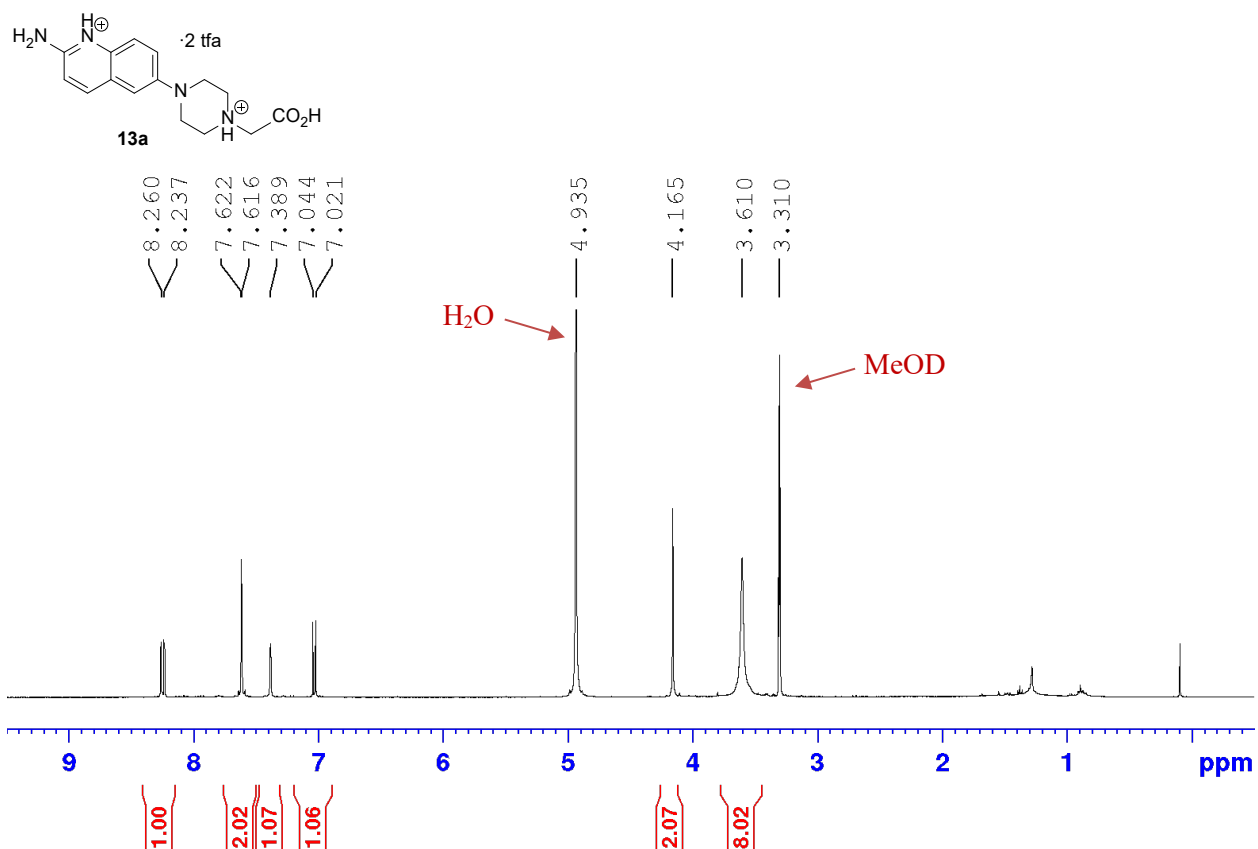

Figure 21.  $^1\text{H}$  NMR spectrum of compound **13a** in  $\text{CD}_3\text{OD}$ .

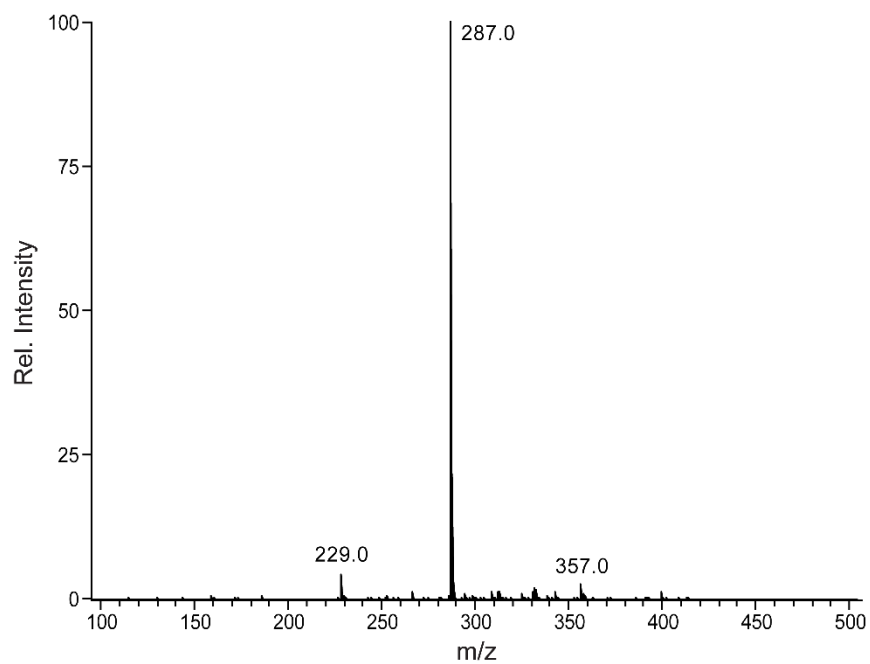

Figure 22. ESI-MS spectrum of compound **13a**.

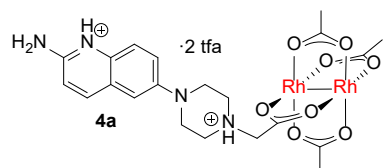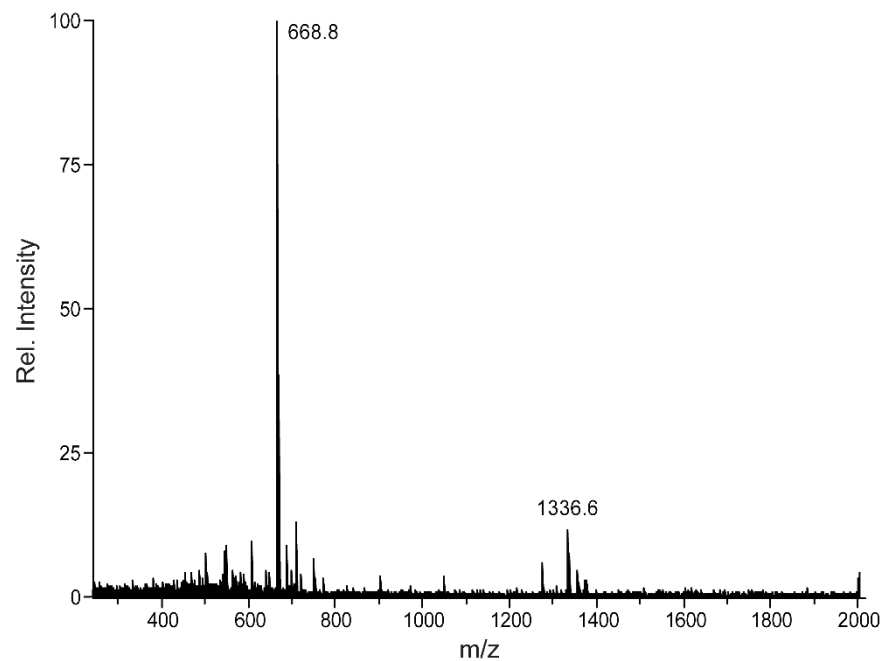

Figure 23. ESI-MS spectrum of compound 4a.

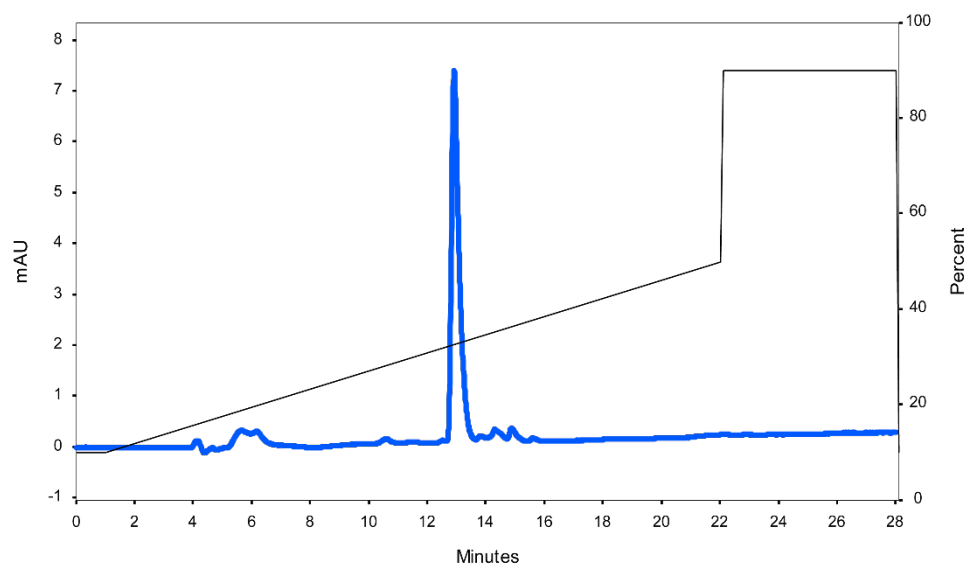

Figure 24. HPLC chromatogram of compound 4a.



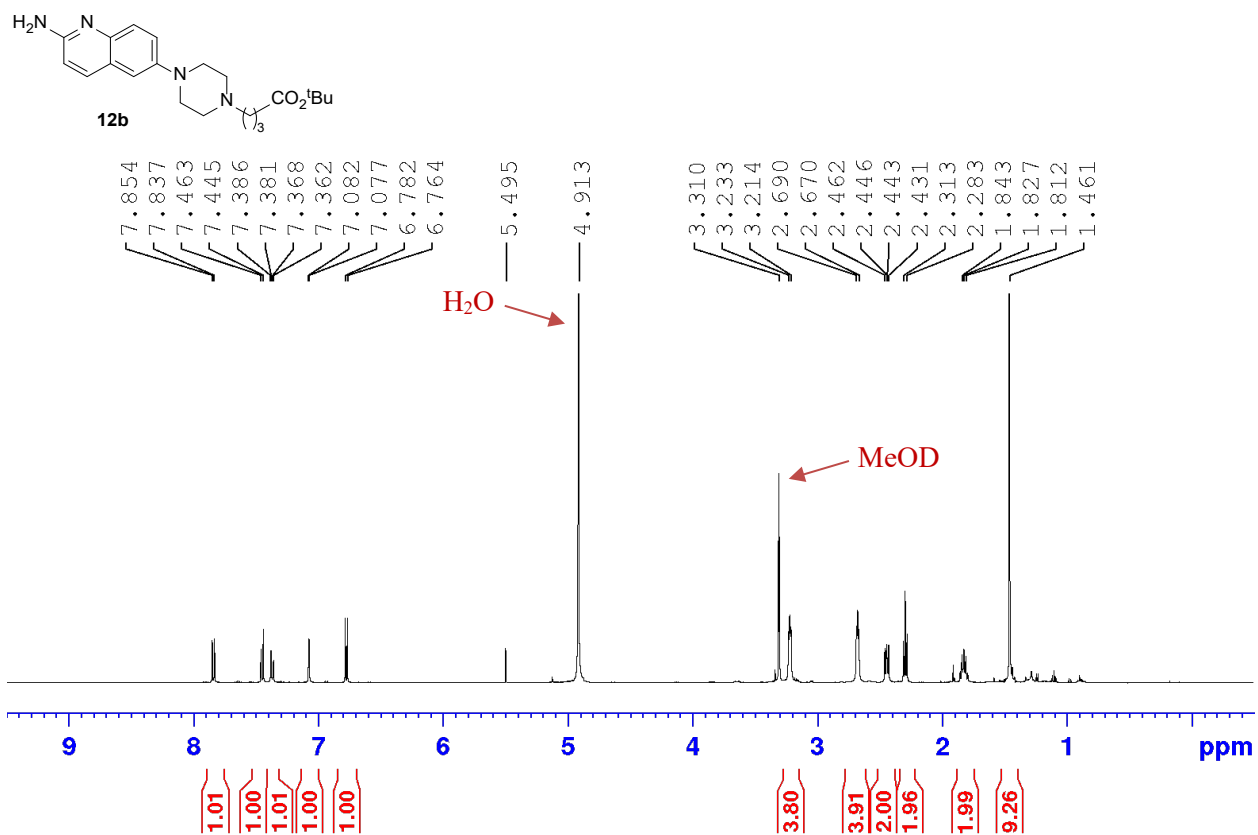

Figure 25. <sup>1</sup>H NMR spectrum of compound **12b** in CD<sub>3</sub>OD.

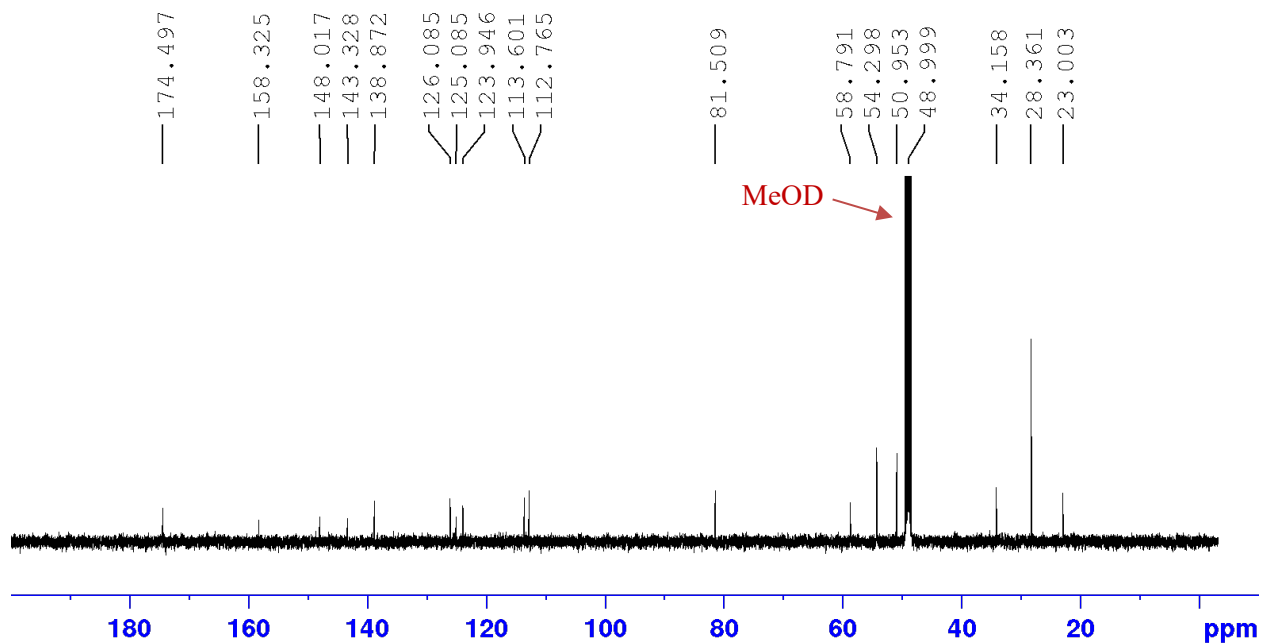

Figure 26. <sup>13</sup>C NMR spectrum of compound **12b** in CD<sub>3</sub>OD.

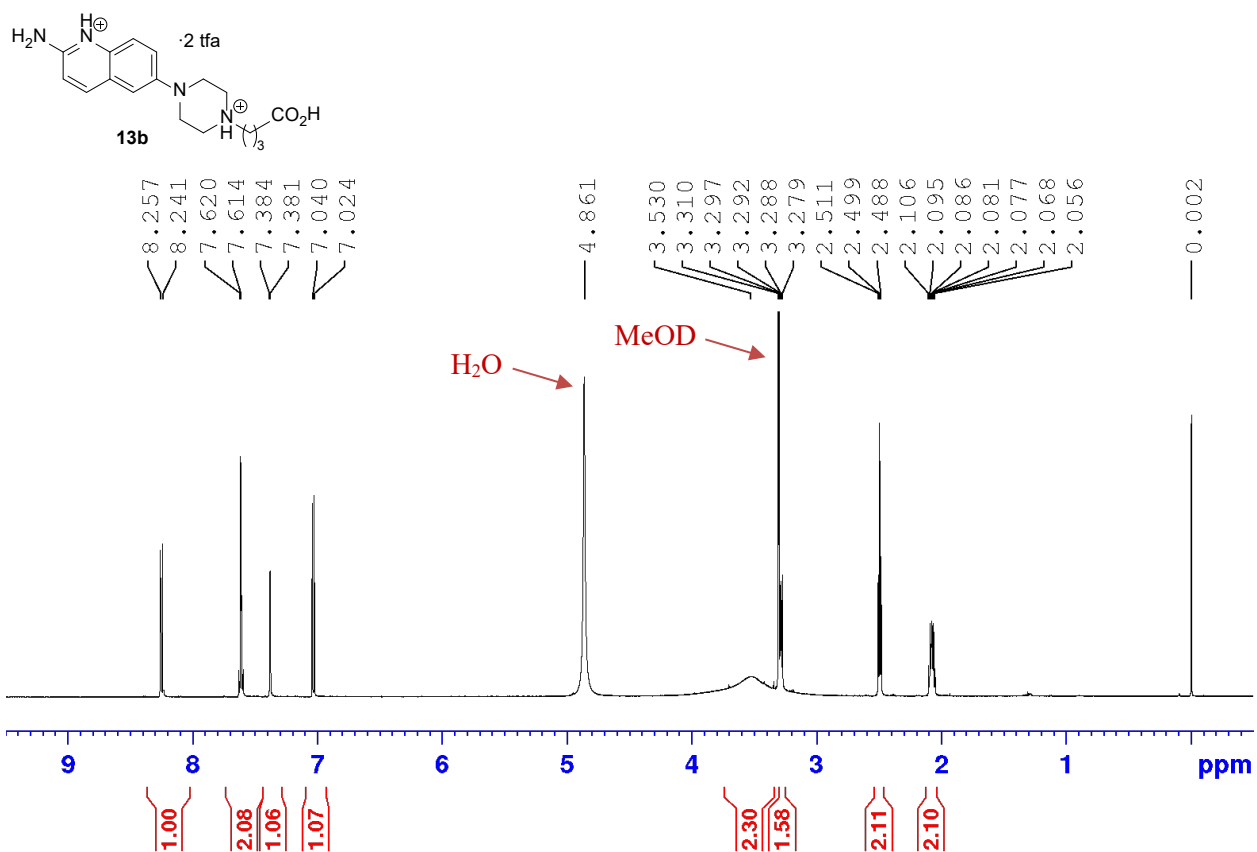

Figure 27. <sup>1</sup>H NMR spectrum of compound **13b** in CD<sub>3</sub>OD.

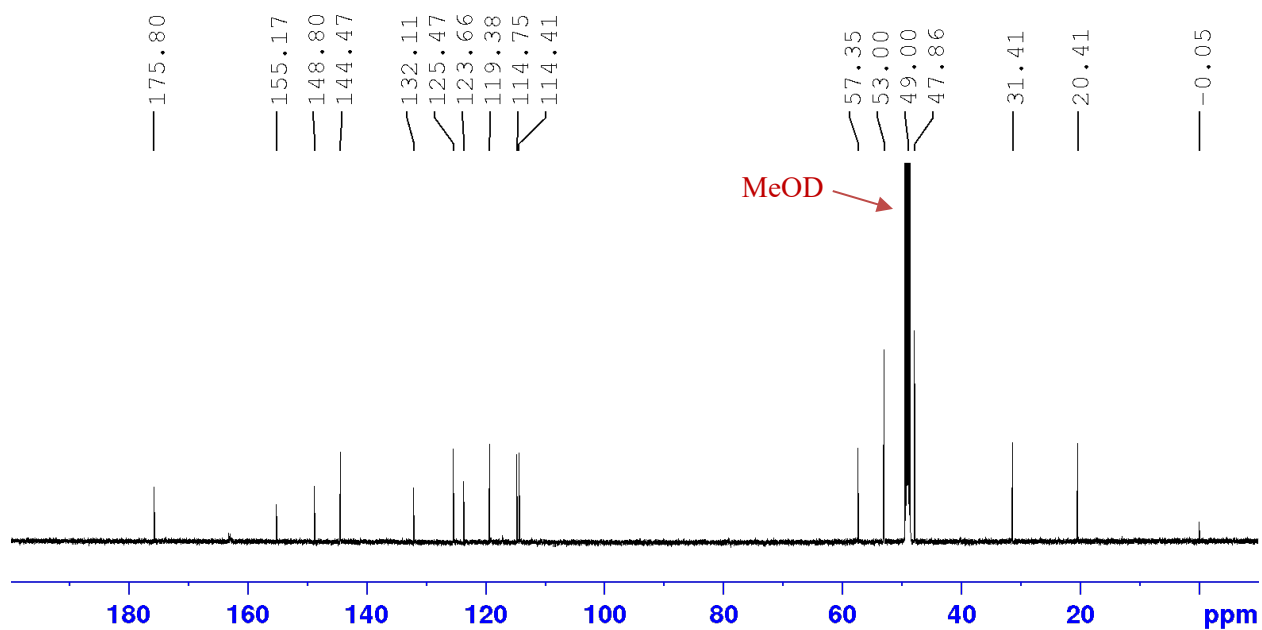

Figure 28. <sup>13</sup>C NMR spectrum of compound **13b** in CD<sub>3</sub>OD.

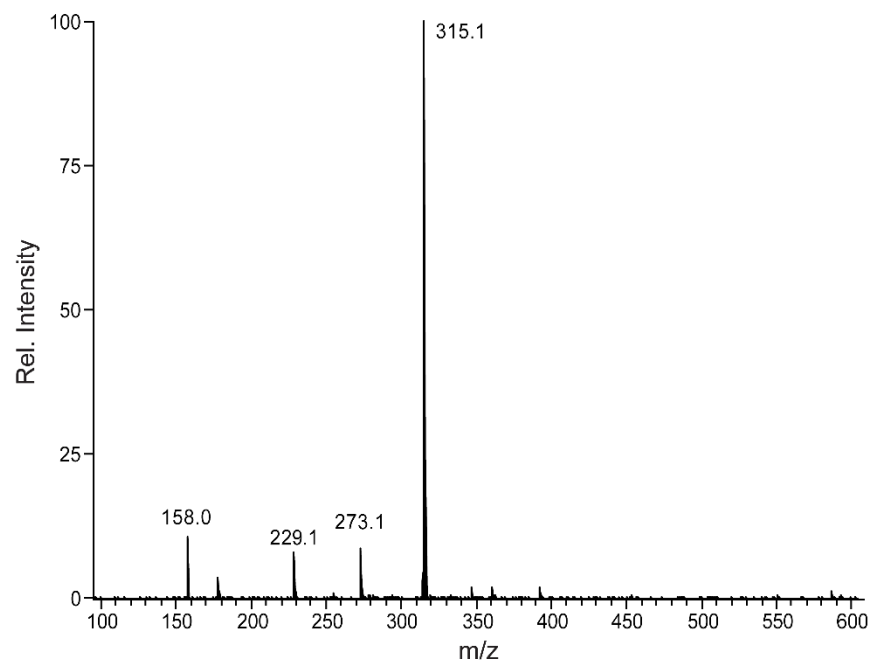

**Figure 29.**ESI-MS spectrum of compound **13b**.

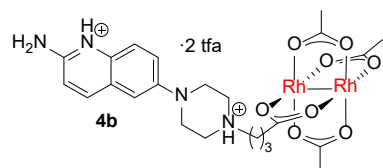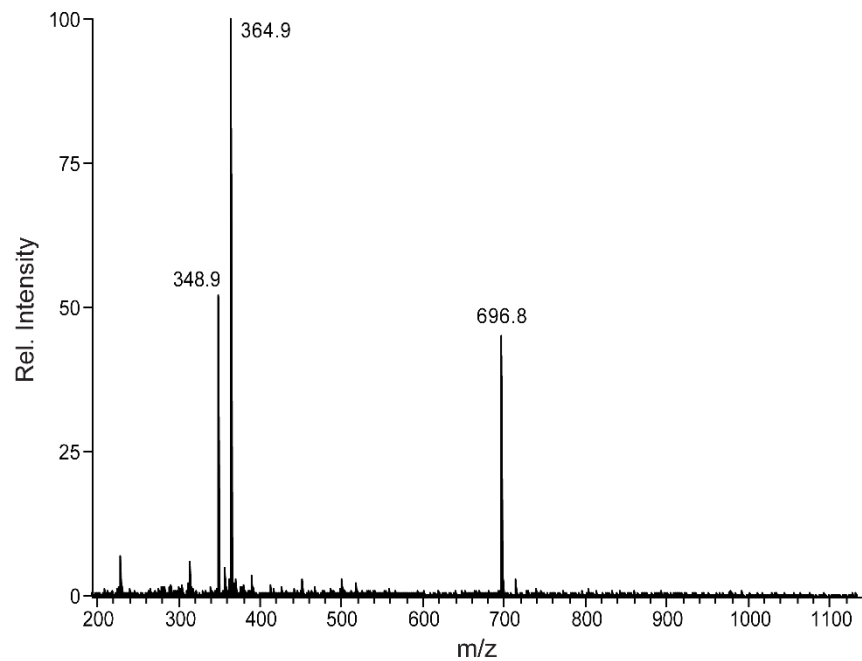

Figure 30. ESI-MS spectrum of compound **4b**.

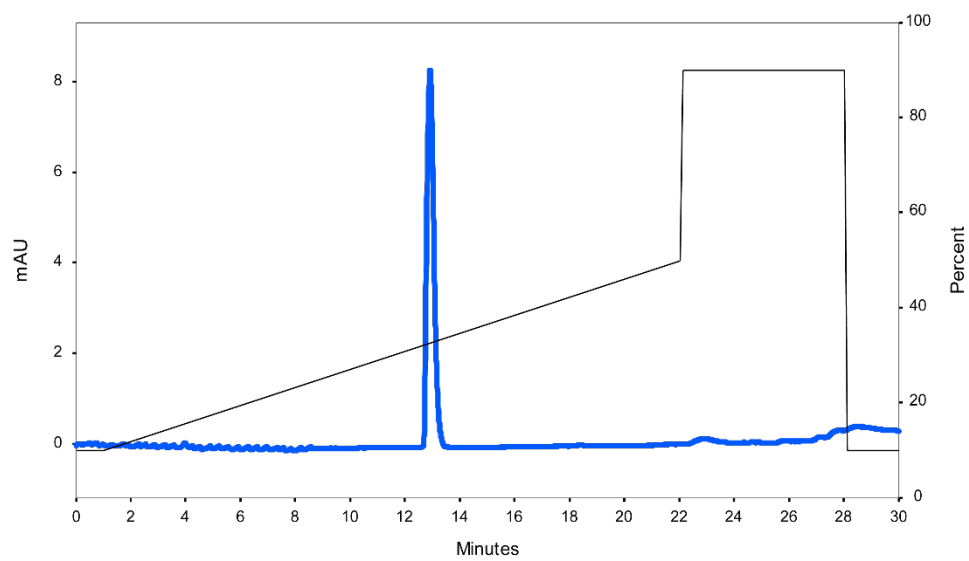

Figure 31. HPLC chromatogram of compound **4b**.

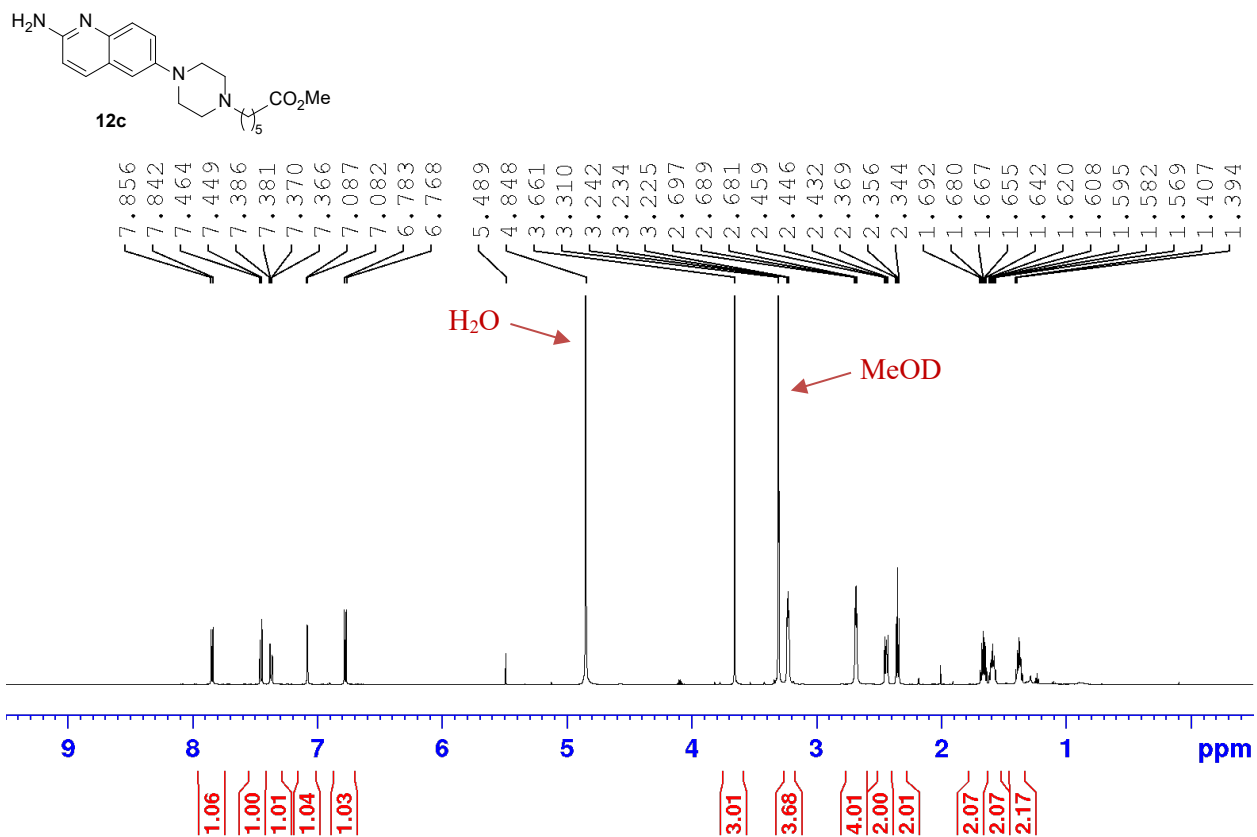

Figure 32. <sup>1</sup>H NMR spectrum of compound **12c** in CD<sub>3</sub>OD.

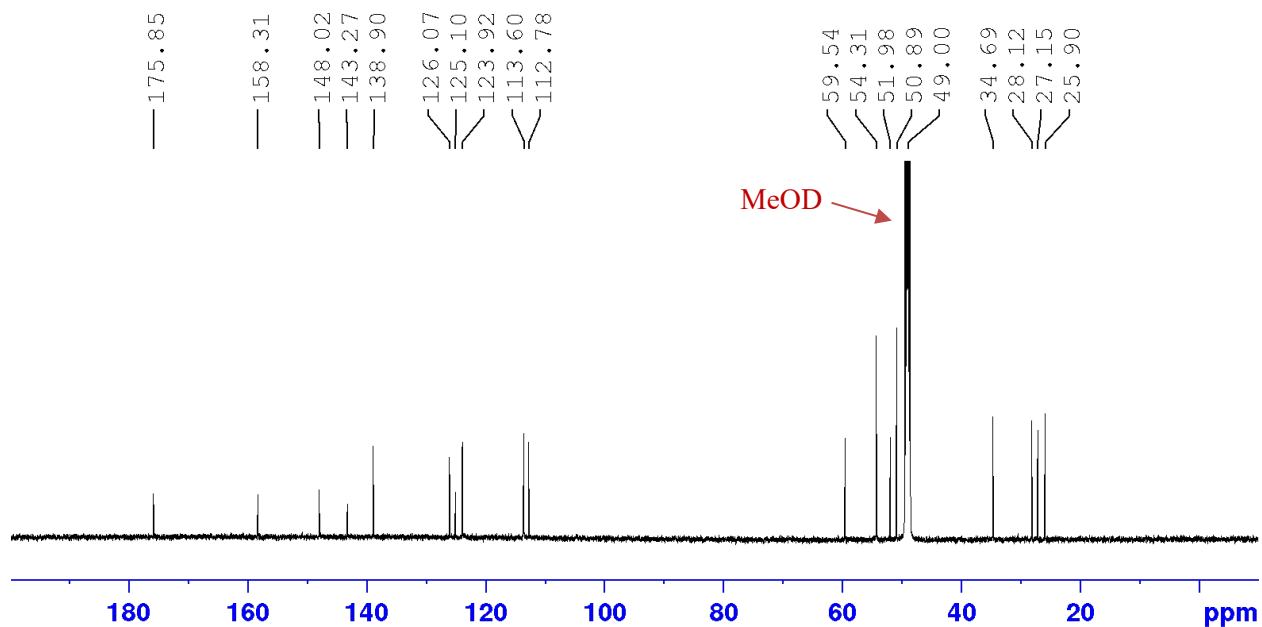

Figure 33. <sup>13</sup>C NMR spectrum of compound **12c** in CD<sub>3</sub>OD.

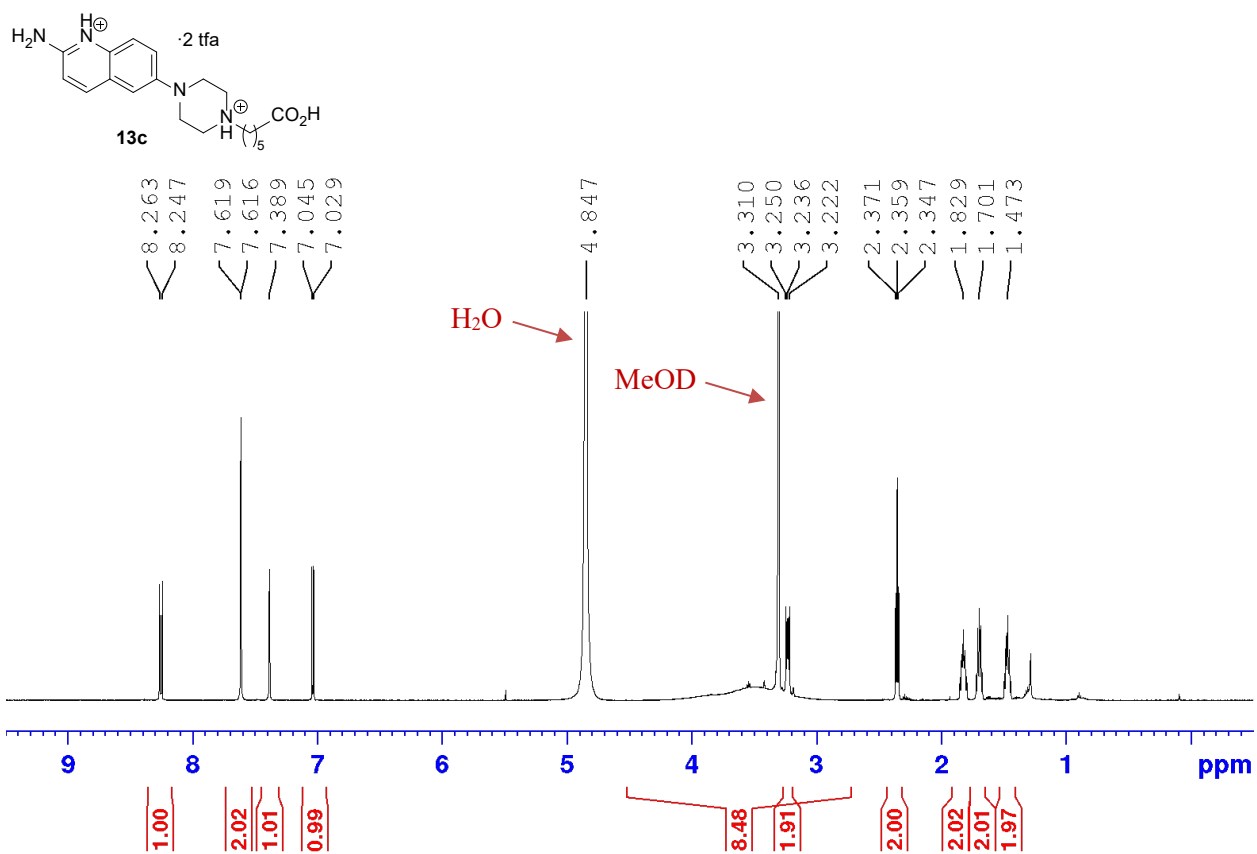

Figure 34. <sup>1</sup>H NMR spectrum of compound **13c** in CD<sub>3</sub>OD.

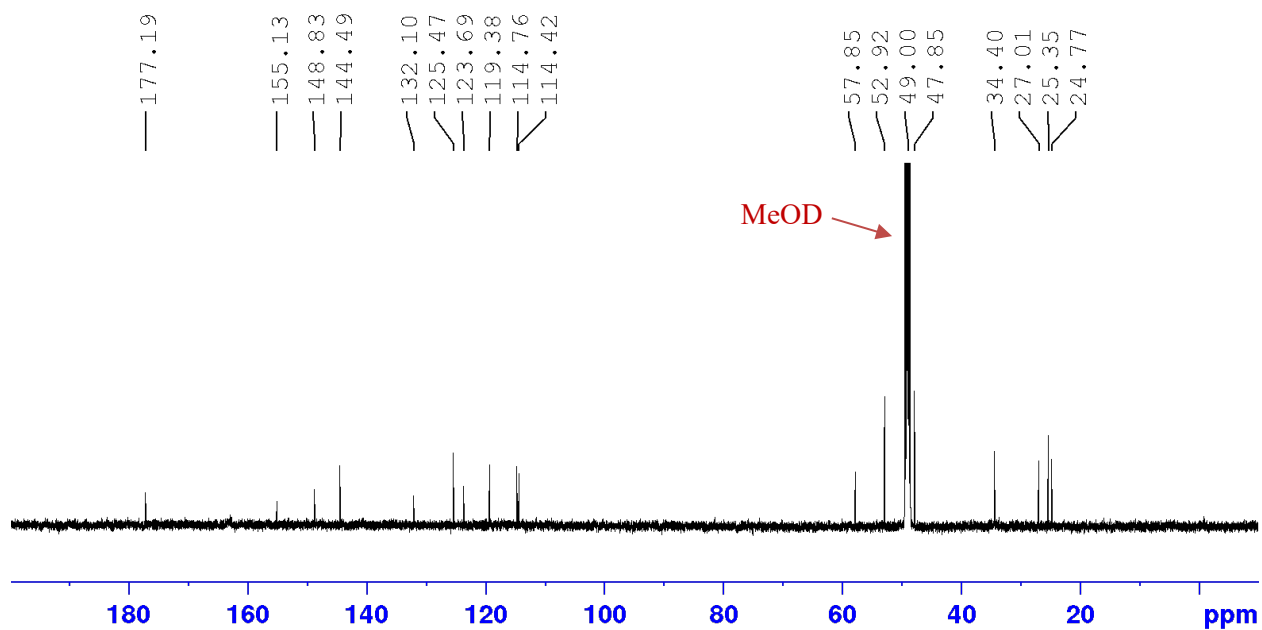

Figure 35. <sup>13</sup>C NMR spectrum of compound **13c** in CD<sub>3</sub>OD.

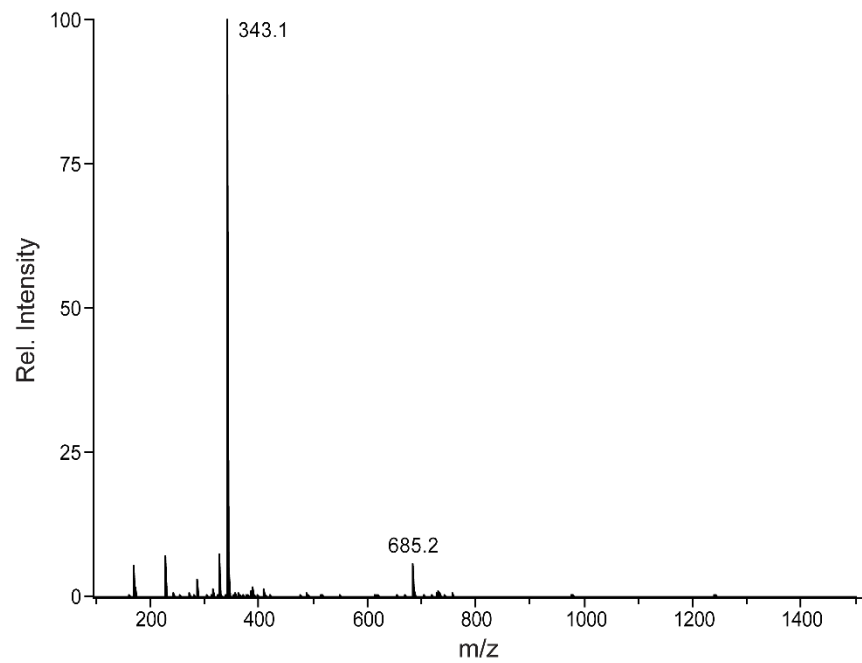

**Figure 36.** ESI-MS spectrum of compound **13c**.

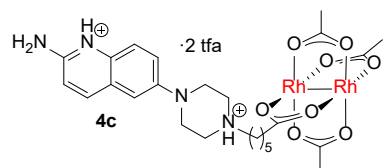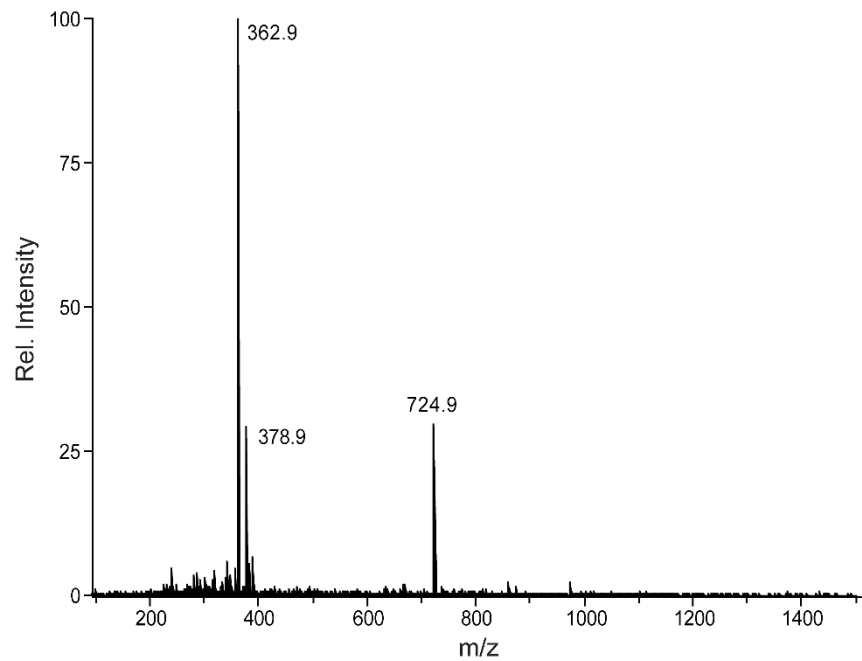

**Figure 37.** ESI-MS spectrum of compound **4c**.

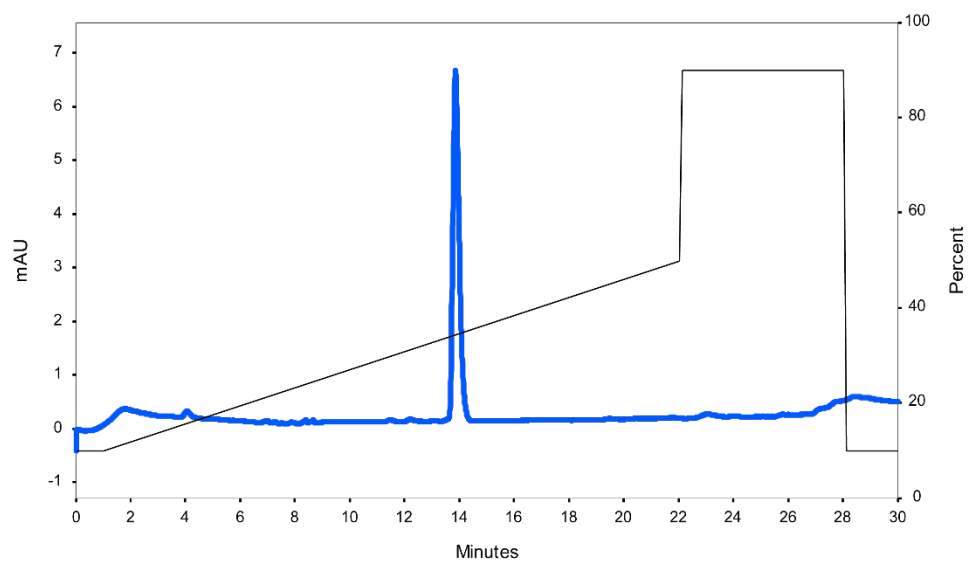

**Figure 38.** HPLC chromatogram of compound **4c**.



## ITC binding data

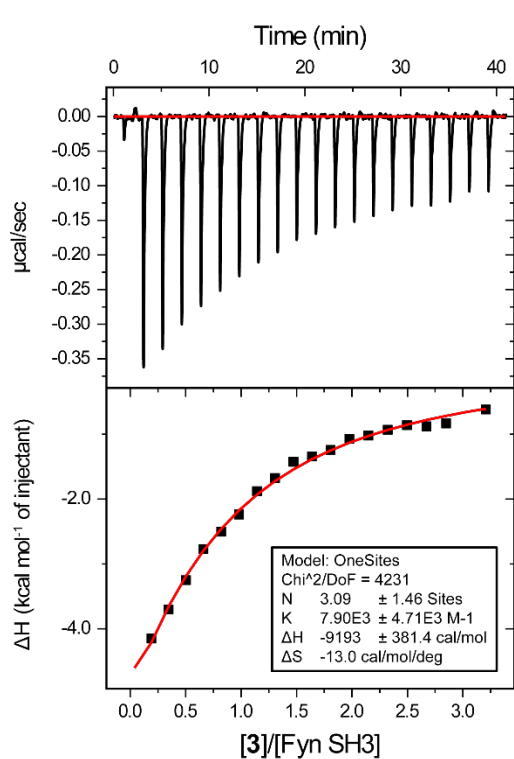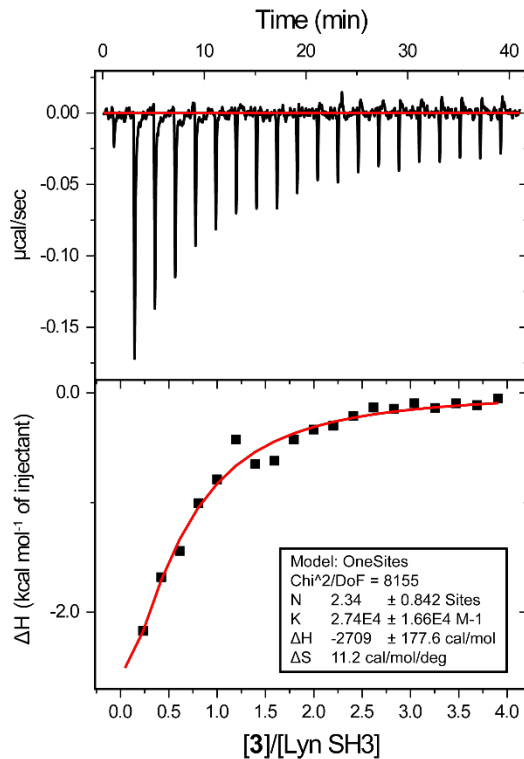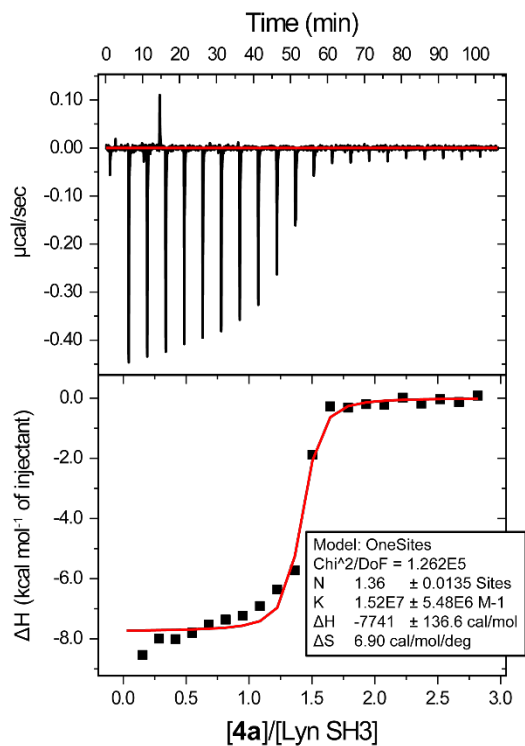

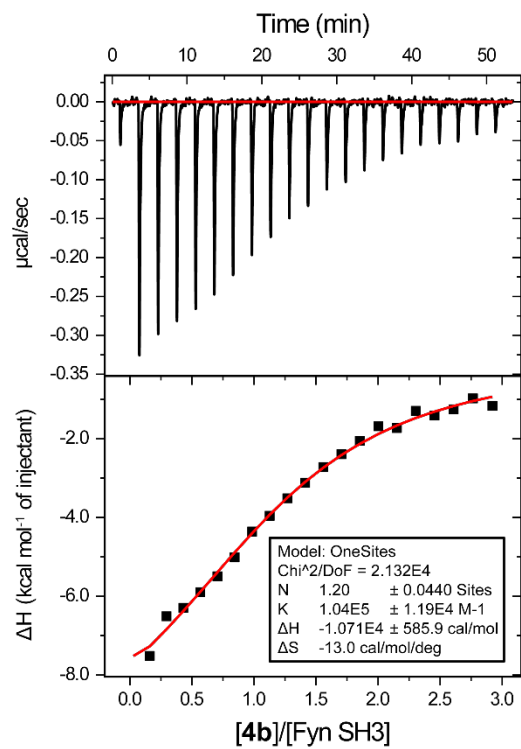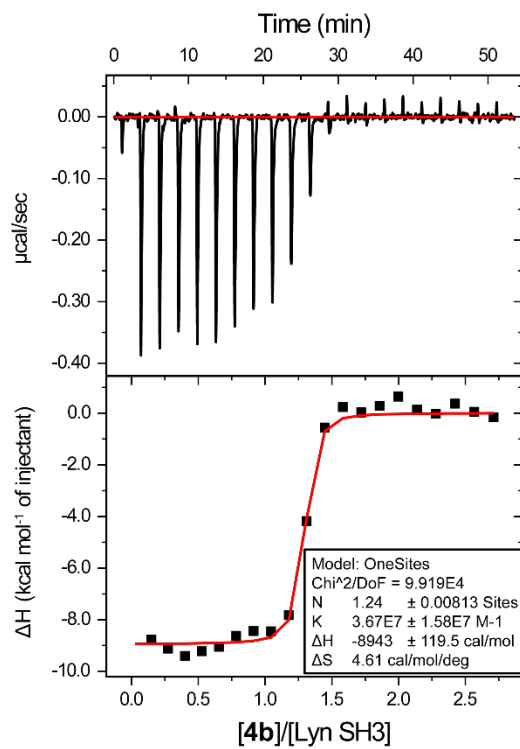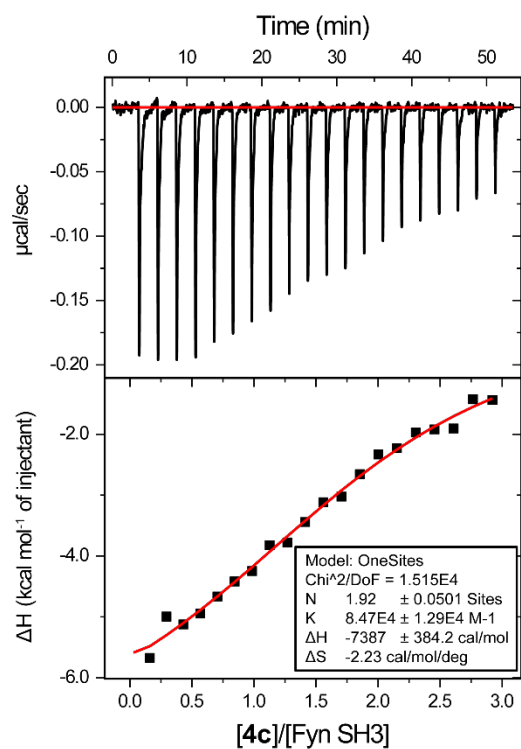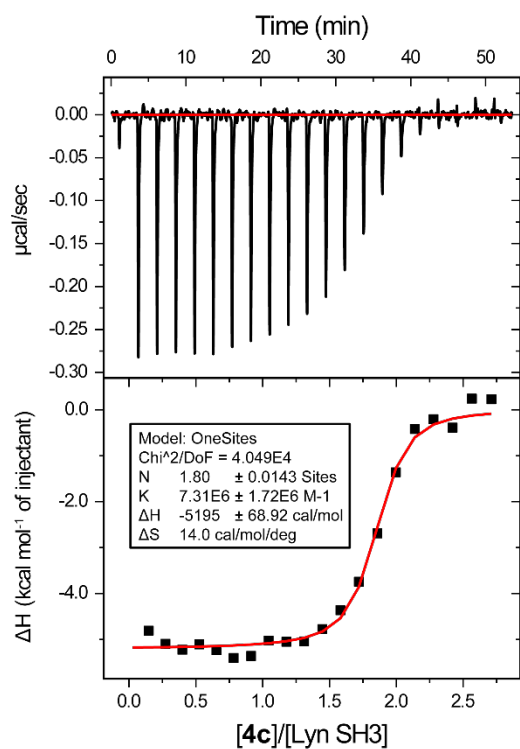

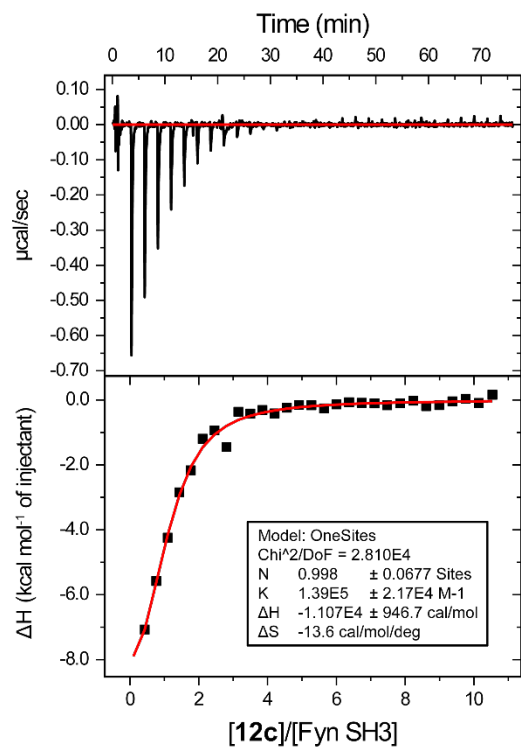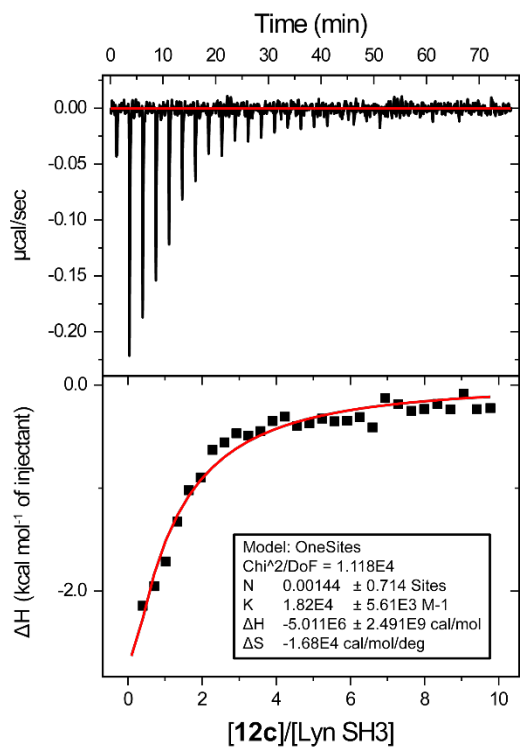

## Computational docking

Overlay of the top 10 docked conformations identified by GOLD:

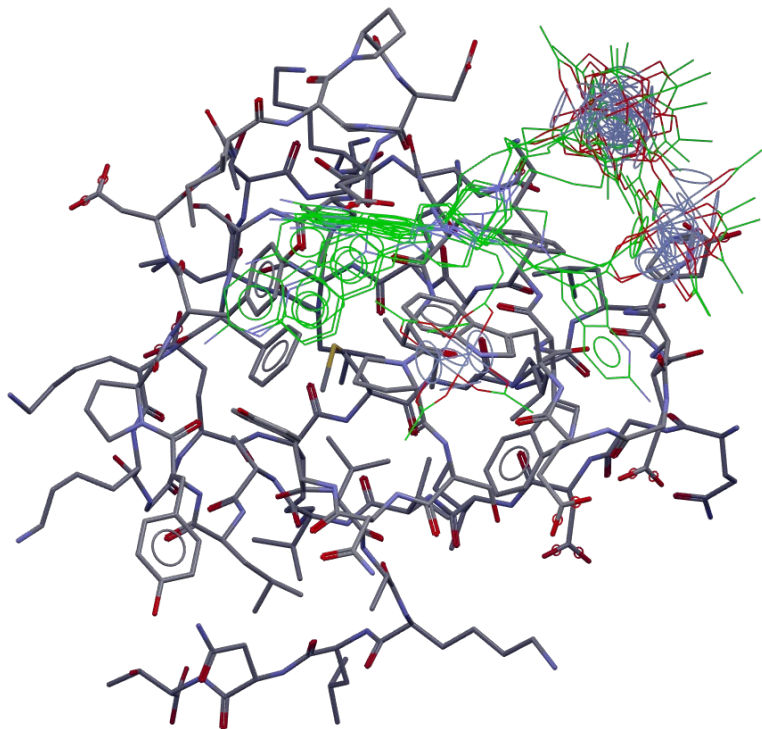

Individual images of the top 10 docked conformations identified by Gold:

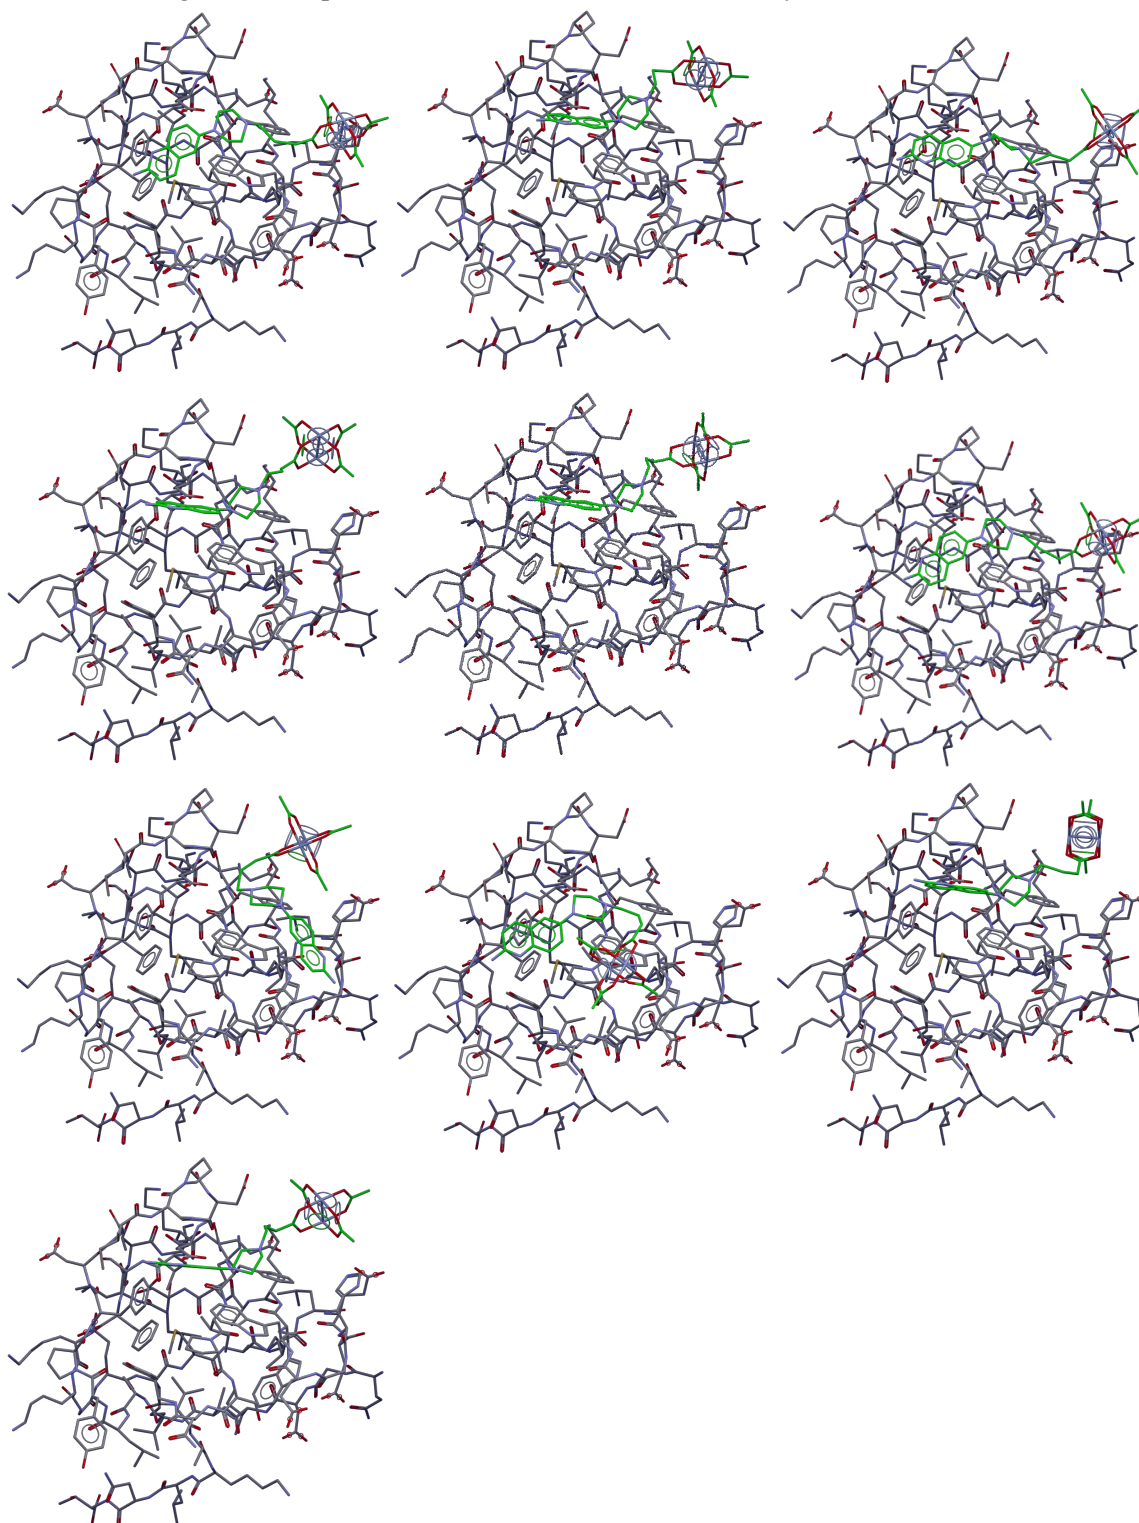

**Coordinates of final binding model:**

|        |    |   |   |   |        |         |         |      |       |   |
|--------|----|---|---|---|--------|---------|---------|------|-------|---|
| HETATM | 1  | N | d | 1 | 10.619 | -4.445  | -30.483 | 1.00 | 99.99 | N |
| HETATM | 2  | N | d | 1 | 11.993 | -2.499  | -31.882 | 1.00 | 99.99 | N |
| HETATM | 3  | N | d | 1 | 19.244 | -1.024  | -32.077 | 1.00 | 99.99 | N |
| HETATM | 4  | N | d | 1 | 17.194 | -1.268  | -31.204 | 1.00 | 99.99 | N |
| HETATM | 5  | C | d | 1 | 4.279  | -5.456  | -28.891 | 1.00 | 99.99 | C |
| HETATM | 6  | C | d | 1 | 3.825  | -4.061  | -29.134 | 1.00 | 99.99 | C |
| HETATM | 7  | C | d | 1 | 7.123  | -7.792  | -29.808 | 1.00 | 99.99 | C |
| HETATM | 8  | C | d | 1 | 8.348  | -7.770  | -30.659 | 1.00 | 99.99 | C |
| HETATM | 9  | C | d | 1 | 5.714  | -10.394 | -27.737 | 1.00 | 99.99 | C |
| HETATM | 10 | C | d | 1 | 2.871  | -8.058  | -26.820 | 1.00 | 99.99 | C |
| HETATM | 11 | C | d | 1 | 6.169  | -11.789 | -27.495 | 1.00 | 99.99 | C |
| HETATM | 12 | C | d | 1 | 1.646  | -8.080  | -25.969 | 1.00 | 99.99 | C |
| HETATM | 13 | C | d | 1 | 10.874 | -1.988  | -31.048 | 1.00 | 99.99 | C |
| HETATM | 14 | C | d | 1 | 10.755 | -3.031  | -29.928 | 1.00 | 99.99 | C |
| HETATM | 15 | C | d | 1 | 11.503 | -4.792  | -31.681 | 1.00 | 99.99 | C |
| HETATM | 16 | C | d | 1 | 11.556 | -3.651  | -32.708 | 1.00 | 99.99 | C |
| HETATM | 17 | C | d | 1 | 15.922 | -1.535  | -31.384 | 1.00 | 99.99 | C |
| HETATM | 18 | C | d | 1 | 15.044 | -1.496  | -30.366 | 1.00 | 99.99 | C |
| HETATM | 19 | C | d | 1 | 13.745 | -1.790  | -30.541 | 1.00 | 99.99 | C |
| HETATM | 20 | C | d | 1 | 13.222 | -2.155  | -31.732 | 1.00 | 99.99 | C |
| HETATM | 21 | C | d | 1 | 14.124 | -2.159  | -32.741 | 1.00 | 99.99 | C |

|        |    |    |   |   |        |         |         |      |       |    |
|--------|----|----|---|---|--------|---------|---------|------|-------|----|
| HETATM | 22 | C  | d | 1 | 15.430 | -1.856  | -32.593 | 1.00 | 99.99 | C  |
| HETATM | 23 | C  | d | 1 | 16.275 | -1.880  | -33.641 | 1.00 | 99.99 | C  |
| HETATM | 24 | C  | d | 1 | 17.570 | -1.591  | -33.457 | 1.00 | 99.99 | C  |
| HETATM | 25 | C  | d | 1 | 18.011 | -1.290  | -32.224 | 1.00 | 99.99 | C  |
| HETATM | 26 | C  | d | 1 | 10.755 | -5.558  | -29.462 | 1.00 | 99.99 | C  |
| HETATM | 27 | C  | d | 1 | 9.962  | -7.065  | -30.233 | 1.00 | 99.99 | C  |
| HETATM | 28 | O  | d | 1 | 3.846  | -6.388  | -29.627 | 1.00 | 99.99 | O  |
| HETATM | 29 | O  | d | 1 | 4.910  | -10.191 | -28.697 | 1.00 | 99.99 | O  |
| HETATM | 30 | O  | d | 1 | 6.032  | -8.159  | -30.335 | 1.00 | 99.99 | O  |
| HETATM | 31 | O  | d | 1 | 2.763  | -8.402  | -28.029 | 1.00 | 99.99 | O  |
| HETATM | 32 | O  | d | 1 | 5.084  | -5.658  | -27.933 | 1.00 | 99.99 | O  |
| HETATM | 33 | O  | d | 1 | 7.231  | -7.449  | -28.600 | 1.00 | 99.99 | O  |
| HETATM | 34 | O  | d | 1 | 6.148  | -9.462  | -27.001 | 1.00 | 99.99 | O  |
| HETATM | 35 | O  | d | 1 | 3.962  | -7.692  | -26.293 | 1.00 | 99.99 | O  |
| HETATM | 36 | Cr | d | 1 | 4.361  | -8.311  | -29.231 | 1.00 | 99.99 | Cr |
| HETATM | 37 | Cr | d | 1 | 5.633  | -7.539  | -27.398 | 1.00 | 99.99 | Cr |
| HETATM | 38 | H  | d | 1 | 3.545  | -3.705  | -28.361 | 1.00 | 99.99 | H  |
| HETATM | 39 | H  | d | 1 | 3.325  | -3.981  | -29.754 | 1.00 | 99.99 | H  |
| HETATM | 40 | H  | d | 1 | 4.552  | -3.434  | -29.263 | 1.00 | 99.99 | H  |
| HETATM | 41 | H  | d | 1 | 8.054  | -7.814  | -31.741 | 1.00 | 99.99 | H  |
| HETATM | 42 | H  | d | 1 | 8.428  | -8.734  | -31.226 | 1.00 | 99.99 | H  |
| HETATM | 43 | H  | d | 1 | 6.449  | -12.146 | -28.267 | 1.00 | 99.99 | H  |

|        |    |   |   |   |        |         |         |      |       |   |
|--------|----|---|---|---|--------|---------|---------|------|-------|---|
| HETATM | 44 | H | d | 1 | 6.669  | -11.869 | -26.876 | 1.00 | 99.99 | H |
| HETATM | 45 | H | d | 1 | 5.442  | -12.416 | -27.365 | 1.00 | 99.99 | H |
| HETATM | 46 | H | d | 1 | 1.631  | -7.359  | -25.444 | 1.00 | 99.99 | H |
| HETATM | 47 | H | d | 1 | 0.921  | -8.238  | -26.422 | 1.00 | 99.99 | H |
| HETATM | 48 | H | d | 1 | 1.817  | -8.648  | -25.379 | 1.00 | 99.99 | H |
| HETATM | 49 | H | d | 1 | 10.987 | -0.951  | -30.672 | 1.00 | 99.99 | H |
| HETATM | 50 | H | d | 1 | 9.927  | -1.952  | -31.636 | 1.00 | 99.99 | H |
| HETATM | 51 | H | d | 1 | 9.870  | -2.795  | -29.292 | 1.00 | 99.99 | H |
| HETATM | 52 | H | d | 1 | 11.685 | -2.920  | -29.330 | 1.00 | 99.99 | H |
| HETATM | 53 | H | d | 1 | 9.636  | -4.501  | -30.845 | 1.00 | 99.99 | H |
| HETATM | 54 | H | d | 1 | 11.102 | -5.710  | -32.172 | 1.00 | 99.99 | H |
| HETATM | 55 | H | d | 1 | 12.545 | -4.998  | -31.341 | 1.00 | 99.99 | H |
| HETATM | 56 | H | d | 1 | 12.182 | -3.890  | -33.590 | 1.00 | 99.99 | H |
| HETATM | 57 | H | d | 1 | 10.542 | -3.472  | -33.136 | 1.00 | 99.99 | H |
| HETATM | 58 | H | d | 1 | 19.906 | -1.036  | -32.893 | 1.00 | 99.99 | H |
| HETATM | 59 | H | d | 1 | 19.621 | -0.791  | -31.124 | 1.00 | 99.99 | H |
| HETATM | 60 | H | d | 1 | 15.395 | -1.237  | -29.353 | 1.00 | 99.99 | H |
| HETATM | 61 | H | d | 1 | 13.141 | -1.752  | -29.621 | 1.00 | 99.99 | H |
| HETATM | 62 | H | d | 1 | 13.826 | -2.437  | -33.762 | 1.00 | 99.99 | H |
| HETATM | 63 | H | d | 1 | 15.926 | -2.128  | -34.657 | 1.00 | 99.99 | H |
| HETATM | 64 | H | d | 1 | 18.256 | -1.600  | -34.322 | 1.00 | 99.99 | H |
| HETATM | 65 | H | d | 1 | 17.554 | -1.033  | -30.269 | 1.00 | 99.99 | H |



|        |    |      |     |   |        |        |         |         |       |       |   |
|--------|----|------|-----|---|--------|--------|---------|---------|-------|-------|---|
| HETATM | 66 | H    | d   | 1 | 10.136 | -5.364 | -28.552 | 1.00    | 99.99 | H     |   |
| HETATM | 67 | H    | d   | 1 | 11.741 | -5.936 | -29.093 | 1.00    | 99.99 | H     |   |
| HETATM | 68 | H    | d   | 1 | 10.632 | -7.406 | -31.056 | 1.00    | 99.99 | H     |   |
| HETATM | 69 | H    | d   | 1 | 10.184 | -7.788 | -29.402 | 1.00    | 99.99 | H     |   |
| ATOM   | 70 | N    | GLN | A | 1      | 10.473 | -14.506 | -14.094 | 1.00  | 0.00  | N |
| ATOM   | 71 | CA   | GLN | A | 1      | 11.422 | -14.806 | -12.985 | 1.00  | 0.00  | C |
| ATOM   | 72 | C    | GLN | A | 1      | 12.711 | -14.008 | -13.187 | 1.00  | 0.00  | C |
| ATOM   | 73 | O    | GLN | A | 1      | 13.327 | -13.554 | -12.243 | 1.00  | 0.00  | O |
| ATOM   | 74 | CB   | GLN | A | 1      | 11.745 | -16.301 | -12.981 | 1.00  | 0.00  | C |
| ATOM   | 75 | CG   | GLN | A | 1      | 11.817 | -16.803 | -11.537 | 1.00  | 0.00  | C |
| ATOM   | 76 | CD   | GLN | A | 1      | 13.260 | -17.185 | -11.202 | 1.00  | 0.00  | C |
| ATOM   | 77 | NE2  | GLN | A | 1      | 13.490 | -18.051 | -10.254 | 1.00  | 0.00  | N |
| ATOM   | 78 | OE1  | GLN | A | 1      | 14.188 | -16.689 | -11.810 | 1.00  | 0.00  | O |
| ATOM   | 79 | H    | GLN | A | 1      | 10.139 | -13.593 | -14.219 | 1.00  | 99.99 | H |
| ATOM   | 80 | HA   | GLN | A | 1      | 10.974 | -14.531 | -12.043 | 1.00  | 99.99 | H |
| ATOM   | 81 | HB2  | GLN | A | 1      | 10.973 | -16.838 | -13.511 | 1.00  | 99.99 | H |
| ATOM   | 82 | HB3  | GLN | A | 1      | 12.696 | -16.465 | -13.466 | 1.00  | 99.99 | H |
| ATOM   | 83 | HG2  | GLN | A | 1      | 11.486 | -16.023 | -10.868 | 1.00  | 99.99 | H |
| ATOM   | 84 | HG3  | GLN | A | 1      | 11.180 | -17.668 | -11.425 | 1.00  | 99.99 | H |
| ATOM   | 85 | HE21 | GLN | A | 1      | 12.742 | -18.451 | -9.764  | 1.00  | 99.99 | H |
| ATOM   | 86 | HE22 | GLN | A | 1      | 14.411 | -18.302 | -10.033 | 1.00  | 99.99 | H |
| ATOM   | 87 | N    | GLY | A | 2      | 13.122 | -13.835 | -14.412 | 1.00  | 0.00  | N |

|      |     |     |     |   |   |        |         |         |      |       |     |
|------|-----|-----|-----|---|---|--------|---------|---------|------|-------|-----|
| ATOM | 88  | CA  | GLY | A | 2 | 14.370 | -13.068 | -14.678 | 1.00 | 0.00  | C   |
| ATOM | 89  | C   | GLY | A | 2 | 15.465 | -14.025 | -15.155 | 1.00 | 0.00  | C   |
| ATOM | 90  | O   | GLY | A | 2 | 15.910 | -14.887 | -14.424 | 1.00 | 0.00  | O   |
| ATOM | 91  | H   | GLY | A | 2 | 12.608 | -14.211 | -15.156 | 1.00 | 99.99 | H   |
| ATOM | 92  | HA2 | GLY | A | 2 | 14.692 | -12.577 | -13.772 | 1.00 | 99.99 | H   |
| ATOM | 93  | HA3 | GLY | A | 2 | 14.182 | -12.327 | -15.441 | 1.00 | 99.99 | H   |
| ATOM | 94  | N   | ASP | A | 3 | 15.902 | -13.880 | -16.376 | 1.00 | 0.00  | N   |
| ATOM | 95  | CA  | ASP | A | 3 | 16.968 | -14.781 | -16.897 | 1.00 | 0.00  | C   |
| ATOM | 96  | C   | ASP | A | 3 | 18.304 | -14.037 | -16.900 | 1.00 | 0.00  | C   |
| ATOM | 97  | O   | ASP | A | 3 | 18.353 | -12.831 | -17.034 | 1.00 | 0.00  | O   |
| ATOM | 98  | CB  | ASP | A | 3 | 16.619 | -15.209 | -18.324 | 1.00 | 0.00  | C   |
| ATOM | 99  | CG  | ASP | A | 3 | 17.202 | -16.597 | -18.597 | 1.00 | 0.00  | C   |
| ATOM | 100 | OD1 | ASP | A | 3 | 16.785 | -17.534 | -17.936 | 1.00 | 0.00  | O   |
| ATOM | 101 | OD2 | ASP | A | 3 | 18.056 | -16.699 | -19.463 | 1.00 | 0.00  | O1- |
| ATOM | 102 | H   | ASP | A | 3 | 15.531 | -13.177 | -16.950 | 1.00 | 99.99 | H   |
| ATOM | 103 | HA  | ASP | A | 3 | 17.042 | -15.654 | -16.267 | 1.00 | 99.99 | H   |
| ATOM | 104 | HB2 | ASP | A | 3 | 15.546 | -15.241 | -18.439 | 1.00 | 99.99 | H   |
| ATOM | 105 | HB3 | ASP | A | 3 | 17.035 | -14.500 | -19.025 | 1.00 | 99.99 | H   |
| ATOM | 106 | N   | ILE | A | 4 | 19.391 | -14.745 | -16.755 | 1.00 | 0.00  | N   |
| ATOM | 107 | CA  | ILE | A | 4 | 20.720 | -14.071 | -16.753 | 1.00 | 0.00  | C   |
| ATOM | 108 | C   | ILE | A | 4 | 21.432 | -14.350 | -18.079 | 1.00 | 0.00  | C   |
| ATOM | 109 | O   | ILE | A | 4 | 21.537 | -15.480 | -18.514 | 1.00 | 0.00  | O   |

|      |     |      |     |   |   |        |         |         |      |       |   |
|------|-----|------|-----|---|---|--------|---------|---------|------|-------|---|
| ATOM | 110 | CB   | ILE | A | 4 | 21.564 | -14.595 | -15.586 | 1.00 | 0.00  | C |
| ATOM | 111 | CG1  | ILE | A | 4 | 22.523 | -13.498 | -15.119 | 1.00 | 0.00  | C |
| ATOM | 112 | CG2  | ILE | A | 4 | 22.372 | -15.816 | -16.035 | 1.00 | 0.00  | C |
| ATOM | 113 | CD1  | ILE | A | 4 | 21.952 | -12.816 | -13.874 | 1.00 | 0.00  | C |
| ATOM | 114 | H    | ILE | A | 4 | 19.333 | -15.718 | -16.651 | 1.00 | 99.99 | H |
| ATOM | 115 | HA   | ILE | A | 4 | 20.578 | -13.006 | -16.643 | 1.00 | 99.99 | H |
| ATOM | 116 | HB   | ILE | A | 4 | 20.915 | -14.875 | -14.770 | 1.00 | 99.99 | H |
| ATOM | 117 | HG12 | ILE | A | 4 | 23.482 | -13.935 | -14.882 | 1.00 | 99.99 | H |
| ATOM | 118 | HG13 | ILE | A | 4 | 22.644 | -12.768 | -15.905 | 1.00 | 99.99 | H |
| ATOM | 119 | HG21 | ILE | A | 4 | 21.725 | -16.502 | -16.561 | 1.00 | 99.99 | H |
| ATOM | 120 | HG22 | ILE | A | 4 | 23.169 | -15.497 | -16.692 | 1.00 | 99.99 | H |
| ATOM | 121 | HG23 | ILE | A | 4 | 22.793 | -16.307 | -15.171 | 1.00 | 99.99 | H |
| ATOM | 122 | HD11 | ILE | A | 4 | 21.819 | -13.549 | -13.091 | 1.00 | 99.99 | H |
| ATOM | 123 | HD12 | ILE | A | 4 | 22.635 | -12.050 | -13.538 | 1.00 | 99.99 | H |
| ATOM | 124 | HD13 | ILE | A | 4 | 20.999 | -12.368 | -14.114 | 1.00 | 99.99 | H |
| ATOM | 125 | N    | VAL | A | 5 | 21.919 | -13.328 | -18.723 | 1.00 | 0.00  | N |
| ATOM | 126 | CA   | VAL | A | 5 | 22.622 | -13.524 | -20.019 | 1.00 | 0.00  | C |
| ATOM | 127 | C    | VAL | A | 5 | 23.968 | -12.808 | -19.964 | 1.00 | 0.00  | C |
| ATOM | 128 | O    | VAL | A | 5 | 24.138 | -11.854 | -19.231 | 1.00 | 0.00  | O |
| ATOM | 129 | CB   | VAL | A | 5 | 21.779 | -12.925 | -21.148 | 1.00 | 0.00  | C |
| ATOM | 130 | CG1  | VAL | A | 5 | 20.763 | -13.961 | -21.631 | 1.00 | 0.00  | C |
| ATOM | 131 | CG2  | VAL | A | 5 | 21.041 | -11.688 | -20.632 | 1.00 | 0.00  | C |

|      |     |      |       |   |        |         |         |      |       |   |
|------|-----|------|-------|---|--------|---------|---------|------|-------|---|
| ATOM | 132 | H    | VAL A | 5 | 21.822 | -12.424 | -18.355 | 1.00 | 99.99 | H |
| ATOM | 133 | HA   | VAL A | 5 | 22.771 | -14.577 | -20.205 | 1.00 | 99.99 | H |
| ATOM | 134 | HB   | VAL A | 5 | 22.424 | -12.643 | -21.967 | 1.00 | 99.99 | H |
| ATOM | 135 | HG11 | VAL A | 5 | 20.498 | -14.614 | -20.813 | 1.00 | 99.99 | H |
| ATOM | 136 | HG12 | VAL A | 5 | 19.878 | -13.457 | -21.991 | 1.00 | 99.99 | H |
| ATOM | 137 | HG13 | VAL A | 5 | 21.196 | -14.544 | -22.431 | 1.00 | 99.99 | H |
| ATOM | 138 | HG21 | VAL A | 5 | 21.638 | -11.202 | -19.875 | 1.00 | 99.99 | H |
| ATOM | 139 | HG22 | VAL A | 5 | 20.870 | -11.003 | -21.450 | 1.00 | 99.99 | H |
| ATOM | 140 | HG23 | VAL A | 5 | 20.093 | -11.985 | -20.208 | 1.00 | 99.99 | H |
| ATOM | 141 | N    | VAL A | 6 | 24.924 | -13.240 | -20.733 | 1.00 | 0.00  | N |
| ATOM | 142 | CA   | VAL A | 6 | 26.239 | -12.550 | -20.706 | 1.00 | 0.00  | C |
| ATOM | 143 | C    | VAL A | 6 | 26.468 | -11.873 | -22.055 | 1.00 | 0.00  | C |
| ATOM | 144 | O    | VAL A | 6 | 26.242 | -12.452 | -23.100 | 1.00 | 0.00  | O |
| ATOM | 145 | CB   | VAL A | 6 | 27.358 | -13.555 | -20.421 | 1.00 | 0.00  | C |
| ATOM | 146 | CG1  | VAL A | 6 | 27.233 | -14.743 | -21.376 | 1.00 | 0.00  | C |
| ATOM | 147 | CG2  | VAL A | 6 | 28.715 | -12.879 | -20.623 | 1.00 | 0.00  | C |
| ATOM | 148 | H    | VAL A | 6 | 24.775 | -14.003 | -21.330 | 1.00 | 99.99 | H |
| ATOM | 149 | HA   | VAL A | 6 | 26.212 | -11.797 | -19.934 | 1.00 | 99.99 | H |
| ATOM | 150 | HB   | VAL A | 6 | 27.277 | -13.903 | -19.402 | 1.00 | 99.99 | H |
| ATOM | 151 | HG11 | VAL A | 6 | 26.778 | -14.417 | -22.299 | 1.00 | 99.99 | H |
| ATOM | 152 | HG12 | VAL A | 6 | 28.214 | -15.146 | -21.580 | 1.00 | 99.99 | H |
| ATOM | 153 | HG13 | VAL A | 6 | 26.618 | -15.507 | -20.922 | 1.00 | 99.99 | H |

|      |     |      |     |   |   |        |         |         |      |       |   |
|------|-----|------|-----|---|---|--------|---------|---------|------|-------|---|
| ATOM | 154 | HG21 | VAL | A | 6 | 28.724 | -11.929 | -20.110 | 1.00 | 99.99 | H |
| ATOM | 155 | HG22 | VAL | A | 6 | 29.495 | -13.511 | -20.223 | 1.00 | 99.99 | H |
| ATOM | 156 | HG23 | VAL | A | 6 | 28.885 | -12.721 | -21.678 | 1.00 | 99.99 | H |
| ATOM | 157 | N    | ALA | A | 7 | 26.899 | -10.644 | -22.037 | 1.00 | 0.00  | N |
| ATOM | 158 | CA   | ALA | A | 7 | 27.129 | -9.916  | -23.312 | 1.00 | 0.00  | C |
| ATOM | 159 | C    | ALA | A | 7 | 28.104 | -10.701 | -24.187 | 1.00 | 0.00  | C |
| ATOM | 160 | O    | ALA | A | 7 | 29.260 | -10.871 | -23.852 | 1.00 | 0.00  | O |
| ATOM | 161 | CB   | ALA | A | 7 | 27.714 | -8.535  | -23.012 | 1.00 | 0.00  | C |
| ATOM | 162 | H    | ALA | A | 7 | 27.065 | -10.195 | -21.182 | 1.00 | 99.99 | H |
| ATOM | 163 | HA   | ALA | A | 7 | 26.191 | -9.802  | -23.834 | 1.00 | 99.99 | H |
| ATOM | 164 | HB1  | ALA | A | 7 | 28.484 | -8.625  | -22.260 | 1.00 | 99.99 | H |
| ATOM | 165 | HB2  | ALA | A | 7 | 26.932 | -7.883  | -22.651 | 1.00 | 99.99 | H |
| ATOM | 166 | HB3  | ALA | A | 7 | 28.139 | -8.120  | -23.915 | 1.00 | 99.99 | H |
| ATOM | 167 | N    | LEU | A | 8 | 27.652 | -11.159 | -25.319 | 1.00 | 0.00  | N |
| ATOM | 168 | CA   | LEU | A | 8 | 28.558 | -11.906 | -26.231 | 1.00 | 0.00  | C |
| ATOM | 169 | C    | LEU | A | 8 | 29.243 | -10.891 | -27.141 | 1.00 | 0.00  | C |
| ATOM | 170 | O    | LEU | A | 8 | 30.346 | -11.093 | -27.608 | 1.00 | 0.00  | O |
| ATOM | 171 | CB   | LEU | A | 8 | 27.748 | -12.896 | -27.071 | 1.00 | 0.00  | C |
| ATOM | 172 | CG   | LEU | A | 8 | 27.162 | -13.977 | -26.160 | 1.00 | 0.00  | C |
| ATOM | 173 | CD1  | LEU | A | 8 | 26.037 | -14.708 | -26.895 | 1.00 | 0.00  | C |
| ATOM | 174 | CD2  | LEU | A | 8 | 28.258 | -14.975 | -25.783 | 1.00 | 0.00  | C |
| ATOM | 175 | H    | LEU | A | 8 | 26.723 | -10.986 | -25.578 | 1.00 | 99.99 | H |

|      |     |      |     |   |   |        |         |         |      |       |   |
|------|-----|------|-----|---|---|--------|---------|---------|------|-------|---|
| ATOM | 176 | HA   | LEU | A | 8 | 29.303 | -12.434 | -25.653 | 1.00 | 99.99 | H |
| ATOM | 177 | HB2  | LEU | A | 8 | 26.947 | -12.373 | -27.571 | 1.00 | 99.99 | H |
| ATOM | 178 | HB3  | LEU | A | 8 | 28.392 | -13.355 | -27.807 | 1.00 | 99.99 | H |
| ATOM | 179 | HG   | LEU | A | 8 | 26.769 | -13.518 | -25.265 | 1.00 | 99.99 | H |
| ATOM | 180 | HD11 | LEU | A | 8 | 26.177 | -14.606 | -27.961 | 1.00 | 99.99 | H |
| ATOM | 181 | HD12 | LEU | A | 8 | 26.054 | -15.755 | -26.628 | 1.00 | 99.99 | H |
| ATOM | 182 | HD13 | LEU | A | 8 | 25.086 | -14.281 | -26.614 | 1.00 | 99.99 | H |
| ATOM | 183 | HD21 | LEU | A | 8 | 29.125 | -14.810 | -26.405 | 1.00 | 99.99 | H |
| ATOM | 184 | HD22 | LEU | A | 8 | 28.528 | -14.838 | -24.746 | 1.00 | 99.99 | H |
| ATOM | 185 | HD23 | LEU | A | 8 | 27.895 | -15.981 | -25.930 | 1.00 | 99.99 | H |
| ATOM | 186 | N    | TYR | A | 9 | 28.587 | -9.790  | -27.380 | 1.00 | 0.00  | N |
| ATOM | 187 | CA   | TYR | A | 9 | 29.173 | -8.732  | -28.243 | 1.00 | 0.00  | C |
| ATOM | 188 | C    | TYR | A | 9 | 28.919 | -7.370  | -27.592 | 1.00 | 0.00  | C |
| ATOM | 189 | O    | TYR | A | 9 | 27.859 | -7.122  | -27.054 | 1.00 | 0.00  | O |
| ATOM | 190 | CB   | TYR | A | 9 | 28.504 | -8.769  | -29.619 | 1.00 | 0.00  | C |
| ATOM | 191 | CG   | TYR | A | 9 | 29.024 | -9.952  | -30.400 | 1.00 | 0.00  | C |
| ATOM | 192 | CD1  | TYR | A | 9 | 28.485 | -11.226 | -30.184 | 1.00 | 0.00  | C |
| ATOM | 193 | CD2  | TYR | A | 9 | 30.045 | -9.774  | -31.341 | 1.00 | 0.00  | C |
| ATOM | 194 | CE1  | TYR | A | 9 | 28.967 | -12.322 | -30.908 | 1.00 | 0.00  | C |
| ATOM | 195 | CE2  | TYR | A | 9 | 30.528 | -10.871 | -32.065 | 1.00 | 0.00  | C |
| ATOM | 196 | CZ   | TYR | A | 9 | 29.989 | -12.145 | -31.849 | 1.00 | 0.00  | C |
| ATOM | 197 | OH   | TYR | A | 9 | 30.464 | -13.225 | -32.563 | 1.00 | 0.00  | O |

|      |     |     |     |   |    |        |         |         |      |       |   |
|------|-----|-----|-----|---|----|--------|---------|---------|------|-------|---|
| ATOM | 198 | H   | TYR | A | 9  | 27.701 | -9.656  | -26.984 | 1.00 | 99.99 | H |
| ATOM | 199 | HA  | TYR | A | 9  | 30.234 | -8.897  | -28.353 | 1.00 | 99.99 | H |
| ATOM | 200 | HB2 | TYR | A | 9  | 27.434 | -8.861  | -29.497 | 1.00 | 99.99 | H |
| ATOM | 201 | HB3 | TYR | A | 9  | 28.728 | -7.858  | -30.153 | 1.00 | 99.99 | H |
| ATOM | 202 | HD1 | TYR | A | 9  | 27.697 | -11.362 | -29.458 | 1.00 | 99.99 | H |
| ATOM | 203 | HD2 | TYR | A | 9  | 30.461 | -8.792  | -31.508 | 1.00 | 99.99 | H |
| ATOM | 204 | HE1 | TYR | A | 9  | 28.551 | -13.305 | -30.741 | 1.00 | 99.99 | H |
| ATOM | 205 | HE2 | TYR | A | 9  | 31.315 | -10.734 | -32.791 | 1.00 | 99.99 | H |
| ATOM | 206 | HH  | TYR | A | 9  | 30.630 | -12.936 | -33.463 | 1.00 | 99.99 | H |
| ATOM | 207 | N   | PRO | A | 10 | 29.908 | -6.470  | -27.649 | 1.00 | 0.00  | N |
| ATOM | 208 | CA  | PRO | A | 10 | 29.792 | -5.123  | -27.072 | 1.00 | 0.00  | C |
| ATOM | 209 | C   | PRO | A | 10 | 28.658 | -4.321  | -27.718 | 1.00 | 0.00  | C |
| ATOM | 210 | O   | PRO | A | 10 | 28.421 | -4.402  | -28.907 | 1.00 | 0.00  | O |
| ATOM | 211 | CB  | PRO | A | 10 | 31.154 | -4.491  | -27.383 | 1.00 | 0.00  | C |
| ATOM | 212 | CG  | PRO | A | 10 | 31.651 | -5.268  | -28.554 | 1.00 | 0.00  | C |
| ATOM | 213 | CD  | PRO | A | 10 | 31.216 | -6.678  | -28.284 | 1.00 | 0.00  | C |
| ATOM | 214 | HA  | PRO | A | 10 | 29.653 | -5.150  | -26.004 | 1.00 | 99.99 | H |
| ATOM | 215 | HB2 | PRO | A | 10 | 31.025 | -3.446  | -27.621 | 1.00 | 99.99 | H |
| ATOM | 216 | HB3 | PRO | A | 10 | 31.807 | -4.593  | -26.529 | 1.00 | 99.99 | H |
| ATOM | 217 | HG2 | PRO | A | 10 | 31.204 | -4.892  | -29.463 | 1.00 | 99.99 | H |
| ATOM | 218 | HG3 | PRO | A | 10 | 32.727 | -5.198  | -28.613 | 1.00 | 99.99 | H |
| ATOM | 219 | HD2 | PRO | A | 10 | 31.131 | -7.241  | -29.198 | 1.00 | 99.99 | H |

|      |     |     |     |   |    |        |        |         |      |       |   |
|------|-----|-----|-----|---|----|--------|--------|---------|------|-------|---|
| ATOM | 220 | HD3 | PRO | A | 10 | 31.909 | -7.170 | -27.617 | 1.00 | 99.99 | H |
| ATOM | 221 | N   | TYR | A | 11 | 27.948 | -3.555 | -26.934 | 1.00 | 0.00  | N |
| ATOM | 222 | CA  | TYR | A | 11 | 26.818 | -2.753 | -27.482 | 1.00 | 0.00  | C |
| ATOM | 223 | C   | TYR | A | 11 | 26.905 | -1.321 | -26.955 | 1.00 | 0.00  | C |
| ATOM | 224 | O   | TYR | A | 11 | 26.929 | -1.094 | -25.761 | 1.00 | 0.00  | O |
| ATOM | 225 | CB  | TYR | A | 11 | 25.497 | -3.373 | -27.023 | 1.00 | 0.00  | C |
| ATOM | 226 | CG  | TYR | A | 11 | 24.350 | -2.774 | -27.806 | 1.00 | 0.00  | C |
| ATOM | 227 | CD1 | TYR | A | 11 | 23.752 | -1.581 | -27.377 | 1.00 | 0.00  | C |
| ATOM | 228 | CD2 | TYR | A | 11 | 23.881 | -3.416 | -28.958 | 1.00 | 0.00  | C |
| ATOM | 229 | CE1 | TYR | A | 11 | 22.686 | -1.031 | -28.101 | 1.00 | 0.00  | C |
| ATOM | 230 | CE2 | TYR | A | 11 | 22.815 | -2.866 | -29.682 | 1.00 | 0.00  | C |
| ATOM | 231 | CZ  | TYR | A | 11 | 22.218 | -1.674 | -29.254 | 1.00 | 0.00  | C |
| ATOM | 232 | OH  | TYR | A | 11 | 21.169 | -1.133 | -29.967 | 1.00 | 0.00  | O |
| ATOM | 233 | H   | TYR | A | 11 | 28.156 | -3.512 | -25.977 | 1.00 | 99.99 | H |
| ATOM | 234 | HA  | TYR | A | 11 | 26.855 | -2.755 | -28.562 | 1.00 | 99.99 | H |
| ATOM | 235 | HB2 | TYR | A | 11 | 25.526 | -4.440 | -27.189 | 1.00 | 99.99 | H |
| ATOM | 236 | HB3 | TYR | A | 11 | 25.354 | -3.178 | -25.971 | 1.00 | 99.99 | H |
| ATOM | 237 | HD1 | TYR | A | 11 | 24.112 | -1.085 | -26.489 | 1.00 | 99.99 | H |
| ATOM | 238 | HD2 | TYR | A | 11 | 24.341 | -4.335 | -29.290 | 1.00 | 99.99 | H |
| ATOM | 239 | HE1 | TYR | A | 11 | 22.225 | -0.112 | -27.770 | 1.00 | 99.99 | H |
| ATOM | 240 | HE2 | TYR | A | 11 | 22.454 | -3.362 | -30.570 | 1.00 | 99.99 | H |
| ATOM | 241 | HH  | TYR | A | 11 | 21.012 | -1.691 | -30.733 | 1.00 | 99.99 | H |



|      |     |     |     |   |    |        |        |         |      |       |     |
|------|-----|-----|-----|---|----|--------|--------|---------|------|-------|-----|
| ATOM | 242 | N   | ASP | A | 12 | 26.943 | -0.350 | -27.823 | 1.00 | 0.00  | N   |
| ATOM | 243 | CA  | ASP | A | 12 | 27.017 | 1.058  | -27.345 | 1.00 | 0.00  | C   |
| ATOM | 244 | C   | ASP | A | 12 | 25.633 | 1.695  | -27.461 | 1.00 | 0.00  | C   |
| ATOM | 245 | O   | ASP | A | 12 | 25.130 | 1.914  | -28.544 | 1.00 | 0.00  | O   |
| ATOM | 246 | CB  | ASP | A | 12 | 28.026 | 1.842  | -28.187 | 1.00 | 0.00  | C   |
| ATOM | 247 | CG  | ASP | A | 12 | 28.959 | 2.627  | -27.264 | 1.00 | 0.00  | C   |
| ATOM | 248 | OD1 | ASP | A | 12 | 28.466 | 3.474  | -26.537 | 1.00 | 0.00  | O   |
| ATOM | 249 | OD2 | ASP | A | 12 | 30.151 | 2.368  | -27.299 | 1.00 | 0.00  | O1- |
| ATOM | 250 | H   | ASP | A | 12 | 26.916 | -0.545 | -28.783 | 1.00 | 99.99 | H   |
| ATOM | 251 | HA  | ASP | A | 12 | 27.321 | 1.060  | -26.309 | 1.00 | 99.99 | H   |
| ATOM | 252 | HB2 | ASP | A | 12 | 28.605 | 1.156  | -28.786 | 1.00 | 99.99 | H   |
| ATOM | 253 | HB3 | ASP | A | 12 | 27.498 | 2.528  | -28.833 | 1.00 | 99.99 | H   |
| ATOM | 254 | N   | GLY | A | 13 | 25.014 | 1.976  | -26.343 | 1.00 | 0.00  | N   |
| ATOM | 255 | CA  | GLY | A | 13 | 23.652 | 2.587  | -26.351 | 1.00 | 0.00  | C   |
| ATOM | 256 | C   | GLY | A | 13 | 23.439 | 3.419  | -27.618 | 1.00 | 0.00  | C   |
| ATOM | 257 | O   | GLY | A | 13 | 23.705 | 4.604  | -27.647 | 1.00 | 0.00  | O   |
| ATOM | 258 | H   | GLY | A | 13 | 25.447 | 1.774  | -25.488 | 1.00 | 99.99 | H   |
| ATOM | 259 | HA2 | GLY | A | 13 | 23.543 | 3.224  | -25.485 | 1.00 | 99.99 | H   |
| ATOM | 260 | HA3 | GLY | A | 13 | 22.910 | 1.803  | -26.311 | 1.00 | 99.99 | H   |
| ATOM | 261 | N   | ILE | A | 14 | 22.944 | 2.809  | -28.661 | 1.00 | 0.00  | N   |
| ATOM | 262 | CA  | ILE | A | 14 | 22.696 | 3.567  | -29.917 | 1.00 | 0.00  | C   |
| ATOM | 263 | C   | ILE | A | 14 | 21.239 | 4.028  | -29.925 | 1.00 | 0.00  | C   |

|      |     |      |          |        |       |         |      |       |   |
|------|-----|------|----------|--------|-------|---------|------|-------|---|
| ATOM | 264 | O    | ILE A 14 | 20.843 | 4.877 | -30.700 | 1.00 | 0.00  | O |
| ATOM | 265 | CB   | ILE A 14 | 22.957 | 2.664 | -31.125 | 1.00 | 0.00  | C |
| ATOM | 266 | CG1  | ILE A 14 | 24.458 | 2.400 | -31.250 | 1.00 | 0.00  | C |
| ATOM | 267 | CG2  | ILE A 14 | 22.453 | 3.353 | -32.394 | 1.00 | 0.00  | C |
| ATOM | 268 | CD1  | ILE A 14 | 24.718 | 0.893 | -31.182 | 1.00 | 0.00  | C |
| ATOM | 269 | H    | ILE A 14 | 22.725 | 1.855 | -28.612 | 1.00 | 99.99 | H |
| ATOM | 270 | HA   | ILE A 14 | 23.351 | 4.426 | -29.955 | 1.00 | 99.99 | H |
| ATOM | 271 | HB   | ILE A 14 | 22.436 | 1.728 | -30.992 | 1.00 | 99.99 | H |
| ATOM | 272 | HG12 | ILE A 14 | 24.814 | 2.784 | -32.195 | 1.00 | 99.99 | H |
| ATOM | 273 | HG13 | ILE A 14 | 24.979 | 2.891 | -30.442 | 1.00 | 99.99 | H |
| ATOM | 274 | HG21 | ILE A 14 | 22.961 | 4.298 | -32.517 | 1.00 | 99.99 | H |
| ATOM | 275 | HG22 | ILE A 14 | 22.652 | 2.723 | -33.249 | 1.00 | 99.99 | H |
| ATOM | 276 | HG23 | ILE A 14 | 21.390 | 3.524 | -32.313 | 1.00 | 99.99 | H |
| ATOM | 277 | HD11 | ILE A 14 | 23.966 | 0.426 | -30.563 | 1.00 | 99.99 | H |
| ATOM | 278 | HD12 | ILE A 14 | 24.676 | 0.476 | -32.177 | 1.00 | 99.99 | H |
| ATOM | 279 | HD13 | ILE A 14 | 25.695 | 0.715 | -30.758 | 1.00 | 99.99 | H |
| ATOM | 280 | N    | HIS A 15 | 20.441 | 3.471 | -29.055 | 1.00 | 0.00  | N |
| ATOM | 281 | CA   | HIS A 15 | 19.008 | 3.864 | -28.984 | 1.00 | 0.00  | C |
| ATOM | 282 | C    | HIS A 15 | 18.751 | 4.563 | -27.649 | 1.00 | 0.00  | C |
| ATOM | 283 | O    | HIS A 15 | 19.622 | 4.646 | -26.806 | 1.00 | 0.00  | O |
| ATOM | 284 | CB   | HIS A 15 | 18.133 | 2.613 | -29.080 | 1.00 | 0.00  | C |
| ATOM | 285 | CG   | HIS A 15 | 17.330 | 2.660 | -30.351 | 1.00 | 0.00  | C |

|      |     |     |     |   |    |        |       |         |      |       |   |
|------|-----|-----|-----|---|----|--------|-------|---------|------|-------|---|
| ATOM | 286 | CD2 | HIS | A | 15 | 17.638 | 3.096 | -31.616 | 1.00 | 0.00  | C |
| ATOM | 287 | ND1 | HIS | A | 15 | 16.018 | 2.216 | -30.413 | 1.00 | 0.00  | N |
| ATOM | 288 | CE1 | HIS | A | 15 | 15.590 | 2.393 | -31.676 | 1.00 | 0.00  | C |
| ATOM | 289 | NE2 | HIS | A | 15 | 16.538 | 2.927 | -32.451 | 1.00 | 0.00  | N |
| ATOM | 290 | H   | HIS | A | 15 | 20.791 | 2.794 | -28.439 | 1.00 | 99.99 | H |
| ATOM | 291 | HA  | HIS | A | 15 | 18.771 | 4.533 | -29.798 | 1.00 | 99.99 | H |
| ATOM | 292 | HB2 | HIS | A | 15 | 18.760 | 1.734 | -29.084 | 1.00 | 99.99 | H |
| ATOM | 293 | HB3 | HIS | A | 15 | 17.464 | 2.575 | -28.233 | 1.00 | 99.99 | H |
| ATOM | 294 | HD1 | HIS | A | 15 | 15.498 | 1.841 | -29.672 | 1.00 | 99.99 | H |
| ATOM | 295 | HD2 | HIS | A | 15 | 18.590 | 3.508 | -31.917 | 1.00 | 99.99 | H |
| ATOM | 296 | HE1 | HIS | A | 15 | 14.599 | 2.136 | -32.022 | 1.00 | 99.99 | H |
| ATOM | 297 | N   | PRO | A | 16 | 17.530 | 5.077 | -27.455 | 1.00 | 0.00  | N |
| ATOM | 298 | CA  | PRO | A | 16 | 17.155 | 5.773 | -26.220 | 1.00 | 0.00  | C |
| ATOM | 299 | C   | PRO | A | 16 | 17.009 | 4.809 | -25.038 | 1.00 | 0.00  | C |
| ATOM | 300 | O   | PRO | A | 16 | 17.300 | 5.150 | -23.909 | 1.00 | 0.00  | O |
| ATOM | 301 | CB  | PRO | A | 16 | 15.801 | 6.395 | -26.556 | 1.00 | 0.00  | C |
| ATOM | 302 | CG  | PRO | A | 16 | 15.246 | 5.532 | -27.640 | 1.00 | 0.00  | C |
| ATOM | 303 | CD  | PRO | A | 16 | 16.422 | 5.022 | -28.425 | 1.00 | 0.00  | C |
| ATOM | 304 | HA  | PRO | A | 16 | 17.849 | 6.553 | -25.964 | 1.00 | 99.99 | H |
| ATOM | 305 | HB2 | PRO | A | 16 | 15.170 | 6.386 | -25.679 | 1.00 | 99.99 | H |
| ATOM | 306 | HB3 | PRO | A | 16 | 15.942 | 7.412 | -26.890 | 1.00 | 99.99 | H |
| ATOM | 307 | HG2 | PRO | A | 16 | 14.693 | 4.712 | -27.205 | 1.00 | 99.99 | H |

|      |     |              |        |        |         |      |       |     |
|------|-----|--------------|--------|--------|---------|------|-------|-----|
| ATOM | 308 | HG3 PRO A 16 | 14.592 | 6.117  | -28.270 | 1.00 | 99.99 | H   |
| ATOM | 309 | HD2 PRO A 16 | 16.242 | 4.012  | -28.763 | 1.00 | 99.99 | H   |
| ATOM | 310 | HD3 PRO A 16 | 16.612 | 5.658  | -29.277 | 1.00 | 99.99 | H   |
| ATOM | 311 | N ASP A 17   | 16.548 | 3.615  | -25.284 | 1.00 | 0.00  | N   |
| ATOM | 312 | CA ASP A 17  | 16.369 | 2.641  | -24.168 | 1.00 | 0.00  | C   |
| ATOM | 313 | C ASP A 17   | 17.362 | 1.481  | -24.301 | 1.00 | 0.00  | C   |
| ATOM | 314 | O ASP A 17   | 17.509 | 0.678  | -23.401 | 1.00 | 0.00  | O   |
| ATOM | 315 | CB ASP A 17  | 14.944 | 2.086  | -24.211 | 1.00 | 0.00  | C   |
| ATOM | 316 | CG ASP A 17  | 13.968 | 3.212  | -24.558 | 1.00 | 0.00  | C   |
| ATOM | 317 | OD1 ASP A 17 | 13.595 | 3.944  | -23.656 | 1.00 | 0.00  | O   |
| ATOM | 318 | OD2 ASP A 17 | 13.610 | 3.322  | -25.719 | 1.00 | 0.00  | O1- |
| ATOM | 319 | H ASP A 17   | 16.303 | 3.362  | -26.198 | 1.00 | 99.99 | H   |
| ATOM | 320 | HA ASP A 17  | 16.523 | 3.143  | -23.224 | 1.00 | 99.99 | H   |
| ATOM | 321 | HB2 ASP A 17 | 14.882 | 1.312  | -24.962 | 1.00 | 99.99 | H   |
| ATOM | 322 | HB3 ASP A 17 | 14.689 | 1.673  | -23.246 | 1.00 | 99.99 | H   |
| ATOM | 323 | N ASP A 18   | 18.038 | 1.374  | -25.412 | 1.00 | 0.00  | N   |
| ATOM | 324 | CA ASP A 18  | 19.003 | 0.252  | -25.584 | 1.00 | 0.00  | C   |
| ATOM | 325 | C ASP A 18   | 20.086 | 0.332  | -24.507 | 1.00 | 0.00  | C   |
| ATOM | 326 | O ASP A 18   | 20.857 | 1.271  | -24.465 | 1.00 | 0.00  | O   |
| ATOM | 327 | CB ASP A 18  | 19.658 | 0.351  | -26.962 | 1.00 | 0.00  | C   |
| ATOM | 328 | CG ASP A 18  | 18.764 | -0.330 | -28.001 | 1.00 | 0.00  | C   |
| ATOM | 329 | OD1 ASP A 18 | 17.722 | -0.835 | -27.616 | 1.00 | 0.00  | O   |

|      |     |      |     |   |    |        |        |         |      |       |     |
|------|-----|------|-----|---|----|--------|--------|---------|------|-------|-----|
| ATOM | 330 | OD2  | ASP | A | 18 | 19.135 | -0.334 | -29.163 | 1.00 | 0.00  | O1- |
| ATOM | 331 | H    | ASP | A | 18 | 17.906 | 2.022  | -26.135 | 1.00 | 99.99 | H   |
| ATOM | 332 | HA   | ASP | A | 18 | 18.473 | -0.686 | -25.509 | 1.00 | 99.99 | H   |
| ATOM | 333 | HB2  | ASP | A | 18 | 19.790 | 1.390  | -27.225 | 1.00 | 99.99 | H   |
| ATOM | 334 | HB3  | ASP | A | 18 | 20.621 | -0.140 | -26.938 | 1.00 | 99.99 | H   |
| ATOM | 335 | N    | LEU | A | 19 | 20.168 | -0.642 | -23.642 | 1.00 | 0.00  | N   |
| ATOM | 336 | CA   | LEU | A | 19 | 21.219 | -0.607 | -22.588 | 1.00 | 0.00  | C   |
| ATOM | 337 | C    | LEU | A | 19 | 22.548 | -1.041 | -23.214 | 1.00 | 0.00  | C   |
| ATOM | 338 | O    | LEU | A | 19 | 22.610 | -1.999 | -23.959 | 1.00 | 0.00  | O   |
| ATOM | 339 | CB   | LEU | A | 19 | 20.815 | -1.552 | -21.445 | 1.00 | 0.00  | C   |
| ATOM | 340 | CG   | LEU | A | 19 | 22.044 | -1.998 | -20.646 | 1.00 | 0.00  | C   |
| ATOM | 341 | CD1  | LEU | A | 19 | 22.792 | -3.090 | -21.415 | 1.00 | 0.00  | C   |
| ATOM | 342 | CD2  | LEU | A | 19 | 22.969 | -0.803 | -20.411 | 1.00 | 0.00  | C   |
| ATOM | 343 | H    | LEU | A | 19 | 19.553 | -1.404 | -23.684 | 1.00 | 99.99 | H   |
| ATOM | 344 | HA   | LEU | A | 19 | 21.313 | 0.400  | -22.209 | 1.00 | 99.99 | H   |
| ATOM | 345 | HB2  | LEU | A | 19 | 20.138 | -1.034 | -20.785 | 1.00 | 99.99 | H   |
| ATOM | 346 | HB3  | LEU | A | 19 | 20.318 | -2.420 | -21.854 | 1.00 | 99.99 | H   |
| ATOM | 347 | HG   | LEU | A | 19 | 21.724 | -2.392 | -19.693 | 1.00 | 99.99 | H   |
| ATOM | 348 | HD11 | LEU | A | 19 | 22.126 | -3.545 | -22.134 | 1.00 | 99.99 | H   |
| ATOM | 349 | HD12 | LEU | A | 19 | 23.634 | -2.656 | -21.930 | 1.00 | 99.99 | H   |
| ATOM | 350 | HD13 | LEU | A | 19 | 23.142 | -3.842 | -20.723 | 1.00 | 99.99 | H   |
| ATOM | 351 | HD21 | LEU | A | 19 | 22.504 | 0.094  | -20.790 | 1.00 | 99.99 | H   |

|      |     |      |     |   |    |        |        |         |      |       |   |
|------|-----|------|-----|---|----|--------|--------|---------|------|-------|---|
| ATOM | 352 | HD22 | LEU | A | 19 | 23.153 | -0.695 | -19.353 | 1.00 | 99.99 | H |
| ATOM | 353 | HD23 | LEU | A | 19 | 23.904 | -0.966 | -20.921 | 1.00 | 99.99 | H |
| ATOM | 354 | N    | SER | A | 20 | 23.609 | -0.336 | -22.930 | 1.00 | 0.00  | N |
| ATOM | 355 | CA   | SER | A | 20 | 24.930 | -0.695 | -23.521 | 1.00 | 0.00  | C |
| ATOM | 356 | C    | SER | A | 20 | 25.600 | -1.797 | -22.697 | 1.00 | 0.00  | C |
| ATOM | 357 | O    | SER | A | 20 | 25.625 | -1.755 | -21.484 | 1.00 | 0.00  | O |
| ATOM | 358 | CB   | SER | A | 20 | 25.830 | 0.542  | -23.525 | 1.00 | 0.00  | C |
| ATOM | 359 | OG   | SER | A | 20 | 26.616 | 0.560  | -22.342 | 1.00 | 0.00  | O |
| ATOM | 360 | H    | SER | A | 20 | 23.540 | 0.438  | -22.333 | 1.00 | 99.99 | H |
| ATOM | 361 | HA   | SER | A | 20 | 24.797 | -1.036 | -24.536 | 1.00 | 99.99 | H |
| ATOM | 362 | HB2  | SER | A | 20 | 26.478 | 0.513  | -24.388 | 1.00 | 99.99 | H |
| ATOM | 363 | HB3  | SER | A | 20 | 25.219 | 1.432  | -23.564 | 1.00 | 99.99 | H |
| ATOM | 364 | HG   | SER | A | 20 | 27.513 | 0.312  | -22.579 | 1.00 | 99.99 | H |
| ATOM | 365 | N    | PHE | A | 21 | 26.168 | -2.771 | -23.353 | 1.00 | 0.00  | N |
| ATOM | 366 | CA   | PHE | A | 21 | 26.862 | -3.861 | -22.615 | 1.00 | 0.00  | C |
| ATOM | 367 | C    | PHE | A | 21 | 28.151 | -4.213 | -23.357 | 1.00 | 0.00  | C |
| ATOM | 368 | O    | PHE | A | 21 | 28.227 | -4.109 | -24.565 | 1.00 | 0.00  | O |
| ATOM | 369 | CB   | PHE | A | 21 | 25.960 | -5.097 | -22.513 | 1.00 | 0.00  | C |
| ATOM | 370 | CG   | PHE | A | 21 | 25.277 | -5.367 | -23.834 | 1.00 | 0.00  | C |
| ATOM | 371 | CD1  | PHE | A | 21 | 24.029 | -4.794 | -24.108 | 1.00 | 0.00  | C |
| ATOM | 372 | CD2  | PHE | A | 21 | 25.883 | -6.207 | -24.775 | 1.00 | 0.00  | C |
| ATOM | 373 | CE1  | PHE | A | 21 | 23.389 | -5.058 | -25.325 | 1.00 | 0.00  | C |

|      |     |     |     |   |    |        |        |         |      |       |     |
|------|-----|-----|-----|---|----|--------|--------|---------|------|-------|-----|
| ATOM | 374 | CE2 | PHE | A | 21 | 25.242 | -6.474 | -25.991 | 1.00 | 0.00  | C   |
| ATOM | 375 | CZ  | PHE | A | 21 | 23.995 | -5.899 | -26.267 | 1.00 | 0.00  | C   |
| ATOM | 376 | H   | PHE | A | 21 | 26.158 | -2.772 | -24.333 | 1.00 | 99.99 | H   |
| ATOM | 377 | HA  | PHE | A | 21 | 27.104 | -3.516 | -21.619 | 1.00 | 99.99 | H   |
| ATOM | 378 | HB2 | PHE | A | 21 | 26.558 | -5.953 | -22.240 | 1.00 | 99.99 | H   |
| ATOM | 379 | HB3 | PHE | A | 21 | 25.211 | -4.928 | -21.753 | 1.00 | 99.99 | H   |
| ATOM | 380 | HD1 | PHE | A | 21 | 23.562 | -4.145 | -23.382 | 1.00 | 99.99 | H   |
| ATOM | 381 | HD2 | PHE | A | 21 | 26.846 | -6.649 | -24.564 | 1.00 | 99.99 | H   |
| ATOM | 382 | HE1 | PHE | A | 21 | 22.428 | -4.615 | -25.537 | 1.00 | 99.99 | H   |
| ATOM | 383 | HE2 | PHE | A | 21 | 25.710 | -7.122 | -26.717 | 1.00 | 99.99 | H   |
| ATOM | 384 | HZ  | PHE | A | 21 | 23.499 | -6.107 | -27.204 | 1.00 | 99.99 | H   |
| ATOM | 385 | N   | LYS | A | 22 | 29.170 | -4.616 | -22.651 | 1.00 | 0.00  | N   |
| ATOM | 386 | CA  | LYS | A | 22 | 30.450 | -4.956 | -23.331 | 1.00 | 0.00  | C   |
| ATOM | 387 | C   | LYS | A | 22 | 30.659 | -6.467 | -23.297 | 1.00 | 0.00  | C   |
| ATOM | 388 | O   | LYS | A | 22 | 30.390 | -7.112 | -22.304 | 1.00 | 0.00  | O   |
| ATOM | 389 | CB  | LYS | A | 22 | 31.606 | -4.271 | -22.600 | 1.00 | 0.00  | C   |
| ATOM | 390 | CG  | LYS | A | 22 | 32.827 | -4.210 | -23.520 | 1.00 | 0.00  | C   |
| ATOM | 391 | CD  | LYS | A | 22 | 34.063 | -4.696 | -22.760 | 1.00 | 0.00  | C   |
| ATOM | 392 | CE  | LYS | A | 22 | 35.059 | -5.312 | -23.745 | 1.00 | 0.00  | C   |
| ATOM | 393 | NZ  | LYS | A | 22 | 35.333 | -4.345 | -24.846 | 1.00 | 0.00  | N1+ |
| ATOM | 394 | H   | LYS | A | 22 | 29.096 | -4.691 | -21.674 | 1.00 | 99.99 | H   |
| ATOM | 395 | HA  | LYS | A | 22 | 30.423 | -4.613 | -24.354 | 1.00 | 99.99 | H   |

|      |     |     |     |   |    |        |        |         |      |       |     |
|------|-----|-----|-----|---|----|--------|--------|---------|------|-------|-----|
| ATOM | 396 | HB2 | LYS | A | 22 | 31.314 | -3.270 | -22.322 | 1.00 | 99.99 | H   |
| ATOM | 397 | HB3 | LYS | A | 22 | 31.854 | -4.833 | -21.711 | 1.00 | 99.99 | H   |
| ATOM | 398 | HG2 | LYS | A | 22 | 32.662 | -4.842 | -24.380 | 1.00 | 99.99 | H   |
| ATOM | 399 | HG3 | LYS | A | 22 | 32.982 | -3.192 | -23.845 | 1.00 | 99.99 | H   |
| ATOM | 400 | HD2 | LYS | A | 22 | 34.527 | -3.861 | -22.255 | 1.00 | 99.99 | H   |
| ATOM | 401 | HD3 | LYS | A | 22 | 33.770 | -5.438 | -22.033 | 1.00 | 99.99 | H   |
| ATOM | 402 | HE2 | LYS | A | 22 | 35.980 | -5.542 | -23.230 | 1.00 | 99.99 | H   |
| ATOM | 403 | HE3 | LYS | A | 22 | 34.641 | -6.218 | -24.159 | 1.00 | 99.99 | H   |
| ATOM | 404 | HZ1 | LYS | A | 22 | 34.896 | -3.429 | -24.619 | 1.00 | 99.99 | H   |
| ATOM | 405 | HZ2 | LYS | A | 22 | 36.359 | -4.220 | -24.951 | 1.00 | 99.99 | H   |
| ATOM | 406 | HZ3 | LYS | A | 22 | 34.934 | -4.710 | -25.735 | 1.00 | 99.99 | H   |
| ATOM | 407 | N   | LYS | A | 23 | 31.147 | -7.041 | -24.365 | 1.00 | 0.00  | N   |
| ATOM | 408 | CA  | LYS | A | 23 | 31.377 | -8.511 | -24.359 | 1.00 | 0.00  | C   |
| ATOM | 409 | C   | LYS | A | 23 | 31.988 | -8.897 | -23.013 | 1.00 | 0.00  | C   |
| ATOM | 410 | O   | LYS | A | 23 | 32.648 | -8.104 | -22.371 | 1.00 | 0.00  | O   |
| ATOM | 411 | CB  | LYS | A | 23 | 32.332 | -8.903 | -25.485 | 1.00 | 0.00  | C   |
| ATOM | 412 | CG  | LYS | A | 23 | 33.545 | -7.971 | -25.473 | 1.00 | 0.00  | C   |
| ATOM | 413 | CD  | LYS | A | 23 | 34.333 | -8.142 | -26.773 | 1.00 | 0.00  | C   |
| ATOM | 414 | CE  | LYS | A | 23 | 35.209 | -9.394 | -26.678 | 1.00 | 0.00  | C   |
| ATOM | 415 | NZ  | LYS | A | 23 | 35.966 | -9.568 | -27.949 | 1.00 | 0.00  | N1+ |
| ATOM | 416 | H   | LYS | A | 23 | 31.368 | -6.509 | -25.157 | 1.00 | 99.99 | H   |
| ATOM | 417 | HA  | LYS | A | 23 | 30.438 | -9.031 | -24.477 | 1.00 | 99.99 | H   |



|      |     |     |     |   |    |        |         |         |      |       |   |
|------|-----|-----|-----|---|----|--------|---------|---------|------|-------|---|
| ATOM | 418 | HB2 | LYS | A | 23 | 32.657 | -9.923  | -25.334 | 1.00 | 99.99 | H |
| ATOM | 419 | HB3 | LYS | A | 23 | 31.823 | -8.823  | -26.434 | 1.00 | 99.99 | H |
| ATOM | 420 | HG2 | LYS | A | 23 | 33.211 | -6.947  | -25.387 | 1.00 | 99.99 | H |
| ATOM | 421 | HG3 | LYS | A | 23 | 34.178 | -8.215  | -24.633 | 1.00 | 99.99 | H |
| ATOM | 422 | HD2 | LYS | A | 23 | 33.646 | -8.246  | -27.600 | 1.00 | 99.99 | H |
| ATOM | 423 | HD3 | LYS | A | 23 | 34.959 | -7.277  | -26.932 | 1.00 | 99.99 | H |
| ATOM | 424 | HE2 | LYS | A | 23 | 35.902 | -9.286  | -25.857 | 1.00 | 99.99 | H |
| ATOM | 425 | HE3 | LYS | A | 23 | 34.583 | -10.258 | -26.510 | 1.00 | 99.99 | H |
| ATOM | 426 | HZ1 | LYS | A | 23 | 36.297 | -8.642  | -28.286 | 1.00 | 99.99 | H |
| ATOM | 427 | HZ2 | LYS | A | 23 | 36.784 | -10.190 | -27.783 | 1.00 | 99.99 | H |
| ATOM | 428 | HZ3 | LYS | A | 23 | 35.346 | -9.994  | -28.667 | 1.00 | 99.99 | H |
| ATOM | 429 | N   | GLY | A | 24 | 31.765 | -10.102 | -22.572 | 1.00 | 0.00  | N |
| ATOM | 430 | CA  | GLY | A | 24 | 32.325 | -10.528 | -21.258 | 1.00 | 0.00  | C |
| ATOM | 431 | C   | GLY | A | 24 | 31.463 | -9.962  | -20.119 | 1.00 | 0.00  | C |
| ATOM | 432 | O   | GLY | A | 24 | 31.540 | -10.410 | -18.992 | 1.00 | 0.00  | O |
| ATOM | 433 | H   | GLY | A | 24 | 31.229 | -10.727 | -23.103 | 1.00 | 99.99 | H |
| ATOM | 434 | HA2 | GLY | A | 24 | 33.335 | -10.158 | -21.161 | 1.00 | 99.99 | H |
| ATOM | 435 | HA3 | GLY | A | 24 | 32.330 | -11.606 | -21.202 | 1.00 | 99.99 | H |
| ATOM | 436 | N   | GLU | A | 25 | 30.644 | -8.982  | -20.402 | 1.00 | 0.00  | N |
| ATOM | 437 | CA  | GLU | A | 25 | 29.783 | -8.391  | -19.334 | 1.00 | 0.00  | C |
| ATOM | 438 | C   | GLU | A | 25 | 28.529 | -9.250  | -19.146 | 1.00 | 0.00  | C |
| ATOM | 439 | O   | GLU | A | 25 | 28.074 | -9.916  | -20.054 | 1.00 | 0.00  | O |

|      |     |     |     |   |    |        |         |         |      |       |     |
|------|-----|-----|-----|---|----|--------|---------|---------|------|-------|-----|
| ATOM | 440 | CB  | GLU | A | 25 | 29.378 | -6.969  | -19.726 | 1.00 | 0.00  | C   |
| ATOM | 441 | CG  | GLU | A | 25 | 29.128 | -6.143  | -18.463 | 1.00 | 0.00  | C   |
| ATOM | 442 | CD  | GLU | A | 25 | 29.999 | -4.885  | -18.495 | 1.00 | 0.00  | C   |
| ATOM | 443 | OE1 | GLU | A | 25 | 31.202 | -5.025  | -18.637 | 1.00 | 0.00  | O   |
| ATOM | 444 | OE2 | GLU | A | 25 | 29.447 | -3.803  | -18.379 | 1.00 | 0.00  | O1- |
| ATOM | 445 | H   | GLU | A | 25 | 30.595 | -8.632  | -21.314 | 1.00 | 99.99 | H   |
| ATOM | 446 | HA  | GLU | A | 25 | 30.321 | -8.370  | -18.401 | 1.00 | 99.99 | H   |
| ATOM | 447 | HB2 | GLU | A | 25 | 30.171 | -6.515  | -20.302 | 1.00 | 99.99 | H   |
| ATOM | 448 | HB3 | GLU | A | 25 | 28.476 | -7.002  | -20.319 | 1.00 | 99.99 | H   |
| ATOM | 449 | HG2 | GLU | A | 25 | 28.087 | -5.859  | -18.418 | 1.00 | 99.99 | H   |
| ATOM | 450 | HG3 | GLU | A | 25 | 29.379 | -6.732  | -17.592 | 1.00 | 99.99 | H   |
| ATOM | 451 | N   | LYS | A | 26 | 27.975 | -9.243  | -17.961 | 1.00 | 0.00  | N   |
| ATOM | 452 | CA  | LYS | A | 26 | 26.756 | -10.060 | -17.690 | 1.00 | 0.00  | C   |
| ATOM | 453 | C   | LYS | A | 26 | 25.528 | -9.153  | -17.605 | 1.00 | 0.00  | C   |
| ATOM | 454 | O   | LYS | A | 26 | 25.598 | -8.028  | -17.152 | 1.00 | 0.00  | O   |
| ATOM | 455 | CB  | LYS | A | 26 | 26.930 | -10.803 | -16.364 | 1.00 | 0.00  | C   |
| ATOM | 456 | CG  | LYS | A | 26 | 27.319 | -12.257 | -16.640 | 1.00 | 0.00  | C   |
| ATOM | 457 | CD  | LYS | A | 26 | 28.365 | -12.708 | -15.618 | 1.00 | 0.00  | C   |
| ATOM | 458 | CE  | LYS | A | 26 | 27.671 | -13.059 | -14.300 | 1.00 | 0.00  | C   |
| ATOM | 459 | NZ  | LYS | A | 26 | 28.662 | -13.659 | -13.362 | 1.00 | 0.00  | N1+ |
| ATOM | 460 | H   | LYS | A | 26 | 28.367 | -8.701  | -17.244 | 1.00 | 99.99 | H   |
| ATOM | 461 | HA  | LYS | A | 26 | 26.614 | -10.777 | -18.485 | 1.00 | 99.99 | H   |

|      |     |     |     |   |    |        |         |         |      |       |   |
|------|-----|-----|-----|---|----|--------|---------|---------|------|-------|---|
| ATOM | 462 | HB2 | LYS | A | 26 | 27.707 | -10.327 | -15.784 | 1.00 | 99.99 | H |
| ATOM | 463 | HB3 | LYS | A | 26 | 26.002 | -10.777 | -15.812 | 1.00 | 99.99 | H |
| ATOM | 464 | HG2 | LYS | A | 26 | 26.444 | -12.885 | -16.561 | 1.00 | 99.99 | H |
| ATOM | 465 | HG3 | LYS | A | 26 | 27.731 | -12.337 | -17.635 | 1.00 | 99.99 | H |
| ATOM | 466 | HD2 | LYS | A | 26 | 28.885 | -13.576 | -15.994 | 1.00 | 99.99 | H |
| ATOM | 467 | HD3 | LYS | A | 26 | 29.072 | -11.909 | -15.450 | 1.00 | 99.99 | H |
| ATOM | 468 | HE2 | LYS | A | 26 | 27.256 | -12.164 | -13.861 | 1.00 | 99.99 | H |
| ATOM | 469 | HE3 | LYS | A | 26 | 26.878 | -13.768 | -14.488 | 1.00 | 99.99 | H |
| ATOM | 470 | HZ1 | LYS | A | 26 | 29.250 | -14.348 | -13.873 | 1.00 | 99.99 | H |
| ATOM | 471 | HZ2 | LYS | A | 26 | 29.267 | -12.909 | -12.970 | 1.00 | 99.99 | H |
| ATOM | 472 | HZ3 | LYS | A | 26 | 28.161 | -14.137 | -12.586 | 1.00 | 99.99 | H |
| ATOM | 473 | N   | MET | A | 27 | 24.403 | -9.642  | -18.045 | 1.00 | 0.00  | N |
| ATOM | 474 | CA  | MET | A | 27 | 23.154 | -8.833  | -18.009 | 1.00 | 0.00  | C |
| ATOM | 475 | C   | MET | A | 27 | 21.985 | -9.705  | -17.559 | 1.00 | 0.00  | C |
| ATOM | 476 | O   | MET | A | 27 | 21.980 | -10.907 | -17.735 | 1.00 | 0.00  | O |
| ATOM | 477 | CB  | MET | A | 27 | 22.843 | -8.306  | -19.407 | 1.00 | 0.00  | C |
| ATOM | 478 | CG  | MET | A | 27 | 23.342 | -6.864  | -19.535 | 1.00 | 0.00  | C |
| ATOM | 479 | SD  | MET | A | 27 | 23.192 | -6.322  | -21.257 | 1.00 | 0.00  | S |
| ATOM | 480 | CE  | MET | A | 27 | 23.963 | -7.769  | -22.025 | 1.00 | 0.00  | C |
| ATOM | 481 | H   | MET | A | 27 | 24.376 | -10.551 | -18.411 | 1.00 | 99.99 | H |
| ATOM | 482 | HA  | MET | A | 27 | 23.244 | -7.993  | -17.334 | 1.00 | 99.99 | H |
| ATOM | 483 | HB2 | MET | A | 27 | 23.330 | -8.926  | -20.144 | 1.00 | 99.99 | H |

|      |     |     |     |   |    |        |         |         |      |       |     |
|------|-----|-----|-----|---|----|--------|---------|---------|------|-------|-----|
| ATOM | 484 | HB3 | MET | A | 27 | 21.774 | -8.329  | -19.561 | 1.00 | 99.99 | H   |
| ATOM | 485 | HG2 | MET | A | 27 | 22.746 | -6.221  | -18.904 | 1.00 | 99.99 | H   |
| ATOM | 486 | HG3 | MET | A | 27 | 24.375 | -6.809  | -19.228 | 1.00 | 99.99 | H   |
| ATOM | 487 | HE1 | MET | A | 27 | 24.617 | -8.250  | -21.311 | 1.00 | 99.99 | H   |
| ATOM | 488 | HE2 | MET | A | 27 | 23.199 | -8.464  | -22.335 | 1.00 | 99.99 | H   |
| ATOM | 489 | HE3 | MET | A | 27 | 24.533 | -7.455  | -22.890 | 1.00 | 99.99 | H   |
| ATOM | 490 | N   | LYS | A | 28 | 20.988 | -9.093  | -16.990 | 1.00 | 0.00  | N   |
| ATOM | 491 | CA  | LYS | A | 28 | 19.795 | -9.855  | -16.530 | 1.00 | 0.00  | C   |
| ATOM | 492 | C   | LYS | A | 28 | 18.565 | -9.288  | -17.236 | 1.00 | 0.00  | C   |
| ATOM | 493 | O   | LYS | A | 28 | 18.416 | -8.091  | -17.359 | 1.00 | 0.00  | O   |
| ATOM | 494 | CB  | LYS | A | 28 | 19.636 | -9.699  | -15.016 | 1.00 | 0.00  | C   |
| ATOM | 495 | CG  | LYS | A | 28 | 18.406 | -10.481 | -14.549 | 1.00 | 0.00  | C   |
| ATOM | 496 | CD  | LYS | A | 28 | 17.833 | -9.827  | -13.290 | 1.00 | 0.00  | C   |
| ATOM | 497 | CE  | LYS | A | 28 | 17.750 | -10.864 | -12.169 | 1.00 | 0.00  | C   |
| ATOM | 498 | NZ  | LYS | A | 28 | 19.071 | -10.966 | -11.488 | 1.00 | 0.00  | N1+ |
| ATOM | 499 | H   | LYS | A | 28 | 21.024 | -8.121  | -16.871 | 1.00 | 99.99 | H   |
| ATOM | 500 | HA  | LYS | A | 28 | 19.910 | -10.899 | -16.781 | 1.00 | 99.99 | H   |
| ATOM | 501 | HB2 | LYS | A | 28 | 20.516 | -10.083 | -14.521 | 1.00 | 99.99 | H   |
| ATOM | 502 | HB3 | LYS | A | 28 | 19.513 | -8.654  | -14.772 | 1.00 | 99.99 | H   |
| ATOM | 503 | HG2 | LYS | A | 28 | 17.660 | -10.476 | -15.329 | 1.00 | 99.99 | H   |
| ATOM | 504 | HG3 | LYS | A | 28 | 18.690 | -11.499 | -14.328 | 1.00 | 99.99 | H   |
| ATOM | 505 | HD2 | LYS | A | 28 | 18.475 | -9.014  | -12.982 | 1.00 | 99.99 | H   |

|      |     |      |     |   |    |        |         |         |      |       |   |
|------|-----|------|-----|---|----|--------|---------|---------|------|-------|---|
| ATOM | 506 | HD3  | LYS | A | 28 | 16.845 | -9.445  | -13.501 | 1.00 | 99.99 | H |
| ATOM | 507 | HE2  | LYS | A | 28 | 16.999 | -10.563 | -11.455 | 1.00 | 99.99 | H |
| ATOM | 508 | HE3  | LYS | A | 28 | 17.485 | -11.825 | -12.587 | 1.00 | 99.99 | H |
| ATOM | 509 | HZ1  | LYS | A | 28 | 19.547 | -10.041 | -11.516 | 1.00 | 99.99 | H |
| ATOM | 510 | HZ2  | LYS | A | 28 | 18.931 | -11.255 | -10.499 | 1.00 | 99.99 | H |
| ATOM | 511 | HZ3  | LYS | A | 28 | 19.659 | -11.674 | -11.973 | 1.00 | 99.99 | H |
| ATOM | 512 | N    | VAL | A | 29 | 17.690 | -10.128 | -17.714 | 1.00 | 0.00  | N |
| ATOM | 513 | CA   | VAL | A | 29 | 16.489 | -9.604  | -18.424 | 1.00 | 0.00  | C |
| ATOM | 514 | C    | VAL | A | 29 | 15.292 | -9.566  | -17.473 | 1.00 | 0.00  | C |
| ATOM | 515 | O    | VAL | A | 29 | 14.874 | -10.575 | -16.940 | 1.00 | 0.00  | O |
| ATOM | 516 | CB   | VAL | A | 29 | 16.168 | -10.500 | -19.619 | 1.00 | 0.00  | C |
| ATOM | 517 | CG1  | VAL | A | 29 | 15.467 | -9.675  | -20.696 | 1.00 | 0.00  | C |
| ATOM | 518 | CG2  | VAL | A | 29 | 17.465 | -11.083 | -20.183 | 1.00 | 0.00  | C |
| ATOM | 519 | H    | VAL | A | 29 | 17.826 | -11.092 | -17.615 | 1.00 | 99.99 | H |
| ATOM | 520 | HA   | VAL | A | 29 | 16.705 | -8.603  | -18.764 | 1.00 | 99.99 | H |
| ATOM | 521 | HB   | VAL | A | 29 | 15.520 | -11.303 | -19.302 | 1.00 | 99.99 | H |
| ATOM | 522 | HG11 | VAL | A | 29 | 14.755 | -9.008  | -20.234 | 1.00 | 99.99 | H |
| ATOM | 523 | HG12 | VAL | A | 29 | 16.200 | -9.098  | -21.240 | 1.00 | 99.99 | H |
| ATOM | 524 | HG13 | VAL | A | 29 | 14.952 | -10.337 | -21.376 | 1.00 | 99.99 | H |
| ATOM | 525 | HG21 | VAL | A | 29 | 18.257 | -10.356 | -20.091 | 1.00 | 99.99 | H |
| ATOM | 526 | HG22 | VAL | A | 29 | 17.728 | -11.974 | -19.632 | 1.00 | 99.99 | H |
| ATOM | 527 | HG23 | VAL | A | 29 | 17.325 | -11.333 | -21.225 | 1.00 | 99.99 | H |

|      |     |      |     |   |    |        |        |         |      |       |   |
|------|-----|------|-----|---|----|--------|--------|---------|------|-------|---|
| ATOM | 528 | N    | LEU | A | 30 | 14.741 | -8.404 | -17.256 | 1.00 | 0.00  | N |
| ATOM | 529 | CA   | LEU | A | 30 | 13.574 | -8.289 | -16.339 | 1.00 | 0.00  | C |
| ATOM | 530 | C    | LEU | A | 30 | 12.277 | -8.555 | -17.109 | 1.00 | 0.00  | C |
| ATOM | 531 | O    | LEU | A | 30 | 11.250 | -8.836 | -16.525 | 1.00 | 0.00  | O |
| ATOM | 532 | CB   | LEU | A | 30 | 13.530 | -6.879 | -15.745 | 1.00 | 0.00  | C |
| ATOM | 533 | CG   | LEU | A | 30 | 14.815 | -6.612 | -14.958 | 1.00 | 0.00  | C |
| ATOM | 534 | CD1  | LEU | A | 30 | 15.142 | -7.825 | -14.084 | 1.00 | 0.00  | C |
| ATOM | 535 | CD2  | LEU | A | 30 | 15.968 | -6.360 | -15.932 | 1.00 | 0.00  | C |
| ATOM | 536 | H    | LEU | A | 30 | 15.101 | -7.604 | -17.693 | 1.00 | 99.99 | H |
| ATOM | 537 | HA   | LEU | A | 30 | 13.672 | -9.010 | -15.542 | 1.00 | 99.99 | H |
| ATOM | 538 | HB2  | LEU | A | 30 | 13.440 | -6.156 | -16.542 | 1.00 | 99.99 | H |
| ATOM | 539 | HB3  | LEU | A | 30 | 12.680 | -6.794 | -15.085 | 1.00 | 99.99 | H |
| ATOM | 540 | HG   | LEU | A | 30 | 14.679 | -5.744 | -14.330 | 1.00 | 99.99 | H |
| ATOM | 541 | HD11 | LEU | A | 30 | 14.224 | -8.273 | -13.732 | 1.00 | 99.99 | H |
| ATOM | 542 | HD12 | LEU | A | 30 | 15.696 | -8.548 | -14.664 | 1.00 | 99.99 | H |
| ATOM | 543 | HD13 | LEU | A | 30 | 15.736 | -7.510 | -13.239 | 1.00 | 99.99 | H |
| ATOM | 544 | HD21 | LEU | A | 30 | 15.577 | -5.966 | -16.858 | 1.00 | 99.99 | H |
| ATOM | 545 | HD22 | LEU | A | 30 | 16.656 | -5.649 | -15.500 | 1.00 | 99.99 | H |
| ATOM | 546 | HD23 | LEU | A | 30 | 16.485 | -7.289 | -16.126 | 1.00 | 99.99 | H |
| ATOM | 547 | N    | GLU | A | 31 | 12.307 | -8.470 | -18.413 | 1.00 | 0.00  | N |
| ATOM | 548 | CA   | GLU | A | 31 | 11.063 | -8.719 | -19.194 | 1.00 | 0.00  | C |
| ATOM | 549 | C    | GLU | A | 31 | 11.423 | -9.193 | -20.602 | 1.00 | 0.00  | C |

|      |     |     |          |        |         |         |      |       |     |
|------|-----|-----|----------|--------|---------|---------|------|-------|-----|
| ATOM | 550 | O   | GLU A 31 | 12.357 | -8.711  | -21.211 | 1.00 | 0.00  | O   |
| ATOM | 551 | CB  | GLU A 31 | 10.250 | -7.427  | -19.282 | 1.00 | 0.00  | C   |
| ATOM | 552 | CG  | GLU A 31 | 8.757  | -7.763  | -19.280 | 1.00 | 0.00  | C   |
| ATOM | 553 | CD  | GLU A 31 | 7.953  | -6.521  | -19.668 | 1.00 | 0.00  | C   |
| ATOM | 554 | OE1 | GLU A 31 | 8.555  | -5.577  | -20.154 | 1.00 | 0.00  | O   |
| ATOM | 555 | OE2 | GLU A 31 | 6.749  | -6.534  | -19.473 | 1.00 | 0.00  | O1- |
| ATOM | 556 | H   | GLU A 31 | 13.141 | -8.240  | -18.877 | 1.00 | 99.99 | H   |
| ATOM | 557 | HA  | GLU A 31 | 10.476 | -9.479  | -18.699 | 1.00 | 99.99 | H   |
| ATOM | 558 | HB2 | GLU A 31 | 10.479 | -6.799  | -18.434 | 1.00 | 99.99 | H   |
| ATOM | 559 | HB3 | GLU A 31 | 10.500 | -6.905  | -20.194 | 1.00 | 99.99 | H   |
| ATOM | 560 | HG2 | GLU A 31 | 8.566  | -8.553  | -19.992 | 1.00 | 99.99 | H   |
| ATOM | 561 | HG3 | GLU A 31 | 8.463  | -8.088  | -18.293 | 1.00 | 99.99 | H   |
| ATOM | 562 | N   | GLU A 32 | 10.682 | -10.129 | -21.126 | 1.00 | 0.00  | N   |
| ATOM | 563 | CA  | GLU A 32 | 10.972 | -10.631 | -22.497 | 1.00 | 0.00  | C   |
| ATOM | 564 | C   | GLU A 32 | 9.883  | -10.141 | -23.451 | 1.00 | 0.00  | C   |
| ATOM | 565 | O   | GLU A 32 | 8.707  | -10.196 | -23.148 | 1.00 | 0.00  | O   |
| ATOM | 566 | CB  | GLU A 32 | 10.996 | -12.161 | -22.489 | 1.00 | 0.00  | C   |
| ATOM | 567 | CG  | GLU A 32 | 11.111 | -12.679 | -23.924 | 1.00 | 0.00  | C   |
| ATOM | 568 | CD  | GLU A 32 | 12.017 | -13.912 | -23.950 | 1.00 | 0.00  | C   |
| ATOM | 569 | OE1 | GLU A 32 | 11.803 | -14.798 | -23.140 | 1.00 | 0.00  | O   |
| ATOM | 570 | OE2 | GLU A 32 | 12.911 | -13.948 | -24.780 | 1.00 | 0.00  | O1- |
| ATOM | 571 | H   | GLU A 32 | 9.929  | -10.500 | -20.620 | 1.00 | 99.99 | H   |

|      |     |     |     |   |    |        |         |         |      |       |   |
|------|-----|-----|-----|---|----|--------|---------|---------|------|-------|---|
| ATOM | 572 | HA  | GLU | A | 32 | 11.932 | -10.256 | -22.824 | 1.00 | 99.99 | H |
| ATOM | 573 | HB2 | GLU | A | 32 | 11.844 | -12.505 | -21.914 | 1.00 | 99.99 | H |
| ATOM | 574 | HB3 | GLU | A | 32 | 10.085 | -12.533 | -22.044 | 1.00 | 99.99 | H |
| ATOM | 575 | HG2 | GLU | A | 32 | 10.130 | -12.946 | -24.290 | 1.00 | 99.99 | H |
| ATOM | 576 | HG3 | GLU | A | 32 | 11.533 | -11.909 | -24.552 | 1.00 | 99.99 | H |
| ATOM | 577 | N   | HIS | A | 33 | 10.262 | -9.661  | -24.602 | 1.00 | 0.00  | N |
| ATOM | 578 | CA  | HIS | A | 33 | 9.253  | -9.167  | -25.576 | 1.00 | 0.00  | C |
| ATOM | 579 | C   | HIS | A | 33 | 9.381  | -9.958  | -26.878 | 1.00 | 0.00  | C |
| ATOM | 580 | O   | HIS | A | 33 | 9.184  | -9.410  | -27.960 | 1.00 | 0.00  | O |
| ATOM | 581 | CB  | HIS | A | 33 | 9.507  | -7.686  | -25.855 | 1.00 | 99.99 | C |
| ATOM | 582 | CG  | HIS | A | 33 | 8.519  | -6.853  | -25.087 | 1.00 | 99.99 | C |
| ATOM | 583 | CD2 | HIS | A | 33 | 8.673  | -5.990  | -24.029 | 1.00 | 99.99 | C |
| ATOM | 584 | ND1 | HIS | A | 33 | 7.165  | -6.849  | -25.383 | 1.00 | 99.99 | N |
| ATOM | 585 | CE1 | HIS | A | 33 | 6.563  | -6.009  | -24.521 | 1.00 | 99.99 | C |
| ATOM | 586 | NE2 | HIS | A | 33 | 7.437  | -5.458  | -23.674 | 1.00 | 99.99 | N |
| ATOM | 587 | N   | GLY | A | 34 | 9.703  | -11.219 | -26.786 | 1.00 | 0.00  | N |
| ATOM | 588 | CA  | GLY | A | 34 | 9.847  | -12.042 | -28.018 | 1.00 | 0.00  | C |
| ATOM | 589 | C   | GLY | A | 34 | 11.318 | -12.069 | -28.441 | 1.00 | 0.00  | C |
| ATOM | 590 | O   | GLY | A | 34 | 12.149 | -12.674 | -27.794 | 1.00 | 0.00  | O |
| ATOM | 591 | H   | GLY | A | 34 | 9.851  | -11.624 | -25.906 | 1.00 | 99.99 | H |
| ATOM | 592 | HA2 | GLY | A | 34 | 9.252  | -11.613 | -28.810 | 1.00 | 99.99 | H |
| ATOM | 593 | HA3 | GLY | A | 34 | 9.511  | -13.049 | -27.820 | 1.00 | 99.99 | H |



|      |     |     |     |   |    |        |         |         |      |       |     |
|------|-----|-----|-----|---|----|--------|---------|---------|------|-------|-----|
| ATOM | 594 | N   | GLU | A | 35 | 11.644 | -11.423 | -29.527 | 1.00 | 0.00  | N   |
| ATOM | 595 | CA  | GLU | A | 35 | 13.060 | -11.417 | -29.994 | 1.00 | 0.00  | C   |
| ATOM | 596 | C   | GLU | A | 35 | 13.833 | -10.295 | -29.296 | 1.00 | 0.00  | C   |
| ATOM | 597 | O   | GLU | A | 35 | 15.035 | -10.183 | -29.433 | 1.00 | 0.00  | O   |
| ATOM | 598 | CB  | GLU | A | 35 | 13.095 | -11.193 | -31.507 | 1.00 | 0.00  | C   |
| ATOM | 599 | CG  | GLU | A | 35 | 14.164 | -12.092 | -32.130 | 1.00 | 0.00  | C   |
| ATOM | 600 | CD  | GLU | A | 35 | 13.537 | -13.429 | -32.529 | 1.00 | 0.00  | C   |
| ATOM | 601 | OE1 | GLU | A | 35 | 12.357 | -13.439 | -32.837 | 1.00 | 0.00  | O   |
| ATOM | 602 | OE2 | GLU | A | 35 | 14.248 | -14.420 | -32.520 | 1.00 | 0.00  | O1- |
| ATOM | 603 | H   | GLU | A | 35 | 10.957 | -10.946 | -30.037 | 1.00 | 99.99 | H   |
| ATOM | 604 | HA  | GLU | A | 35 | 13.518 | -12.367 | -29.762 | 1.00 | 99.99 | H   |
| ATOM | 605 | HB2 | GLU | A | 35 | 12.131 | -11.434 | -31.929 | 1.00 | 99.99 | H   |
| ATOM | 606 | HB3 | GLU | A | 35 | 13.330 | -10.159 | -31.712 | 1.00 | 99.99 | H   |
| ATOM | 607 | HG2 | GLU | A | 35 | 14.573 | -11.610 | -33.007 | 1.00 | 99.99 | H   |
| ATOM | 608 | HG3 | GLU | A | 35 | 14.953 | -12.264 | -31.413 | 1.00 | 99.99 | H   |
| ATOM | 609 | N   | TRP | A | 36 | 13.159 | -9.460  | -28.553 | 1.00 | 0.00  | N   |
| ATOM | 610 | CA  | TRP | A | 36 | 13.871 | -8.349  | -27.859 | 1.00 | 0.00  | C   |
| ATOM | 611 | C   | TRP | A | 36 | 13.477 | -8.325  | -26.380 | 1.00 | 0.00  | C   |
| ATOM | 612 | O   | TRP | A | 36 | 12.337 | -8.550  | -26.028 | 1.00 | 0.00  | O   |
| ATOM | 613 | CB  | TRP | A | 36 | 13.489 | -7.017  | -28.507 | 1.00 | 0.00  | C   |
| ATOM | 614 | CG  | TRP | A | 36 | 14.308 | -6.809  | -29.740 | 1.00 | 0.00  | C   |
| ATOM | 615 | CD1 | TRP | A | 36 | 14.096 | -7.423  | -30.927 | 1.00 | 0.00  | C   |

|      |     |     |     |   |    |        |        |         |      |       |   |
|------|-----|-----|-----|---|----|--------|--------|---------|------|-------|---|
| ATOM | 616 | CD2 | TRP | A | 36 | 15.461 | -5.938 | -29.931 | 1.00 | 0.00  | C |
| ATOM | 617 | CE2 | TRP | A | 36 | 15.909 | -6.070 | -31.266 | 1.00 | 0.00  | C |
| ATOM | 618 | CE3 | TRP | A | 36 | 16.154 | -5.056 | -29.082 | 1.00 | 0.00  | C |
| ATOM | 619 | NE1 | TRP | A | 36 | 15.046 | -6.986 | -31.833 | 1.00 | 0.00  | N |
| ATOM | 620 | CZ2 | TRP | A | 36 | 17.006 | -5.352 | -31.743 | 1.00 | 0.00  | C |
| ATOM | 621 | CZ3 | TRP | A | 36 | 17.259 | -4.332 | -29.560 | 1.00 | 0.00  | C |
| ATOM | 622 | CH2 | TRP | A | 36 | 17.684 | -4.479 | -30.887 | 1.00 | 0.00  | C |
| ATOM | 623 | H   | TRP | A | 36 | 12.190 | -9.561 | -28.455 | 1.00 | 99.99 | H |
| ATOM | 624 | HA  | TRP | A | 36 | 14.937 | -8.499 | -27.947 | 1.00 | 99.99 | H |
| ATOM | 625 | HB2 | TRP | A | 36 | 12.441 | -7.031 | -28.769 | 1.00 | 99.99 | H |
| ATOM | 626 | HB3 | TRP | A | 36 | 13.675 | -6.212 | -27.812 | 1.00 | 99.99 | H |
| ATOM | 627 | HD1 | TRP | A | 36 | 13.313 | -8.139 | -31.133 | 1.00 | 99.99 | H |
| ATOM | 628 | HE1 | TRP | A | 36 | 15.114 | -7.278 | -32.766 | 1.00 | 99.99 | H |
| ATOM | 629 | HE3 | TRP | A | 36 | 15.835 | -4.935 | -28.058 | 1.00 | 99.99 | H |
| ATOM | 630 | HZ2 | TRP | A | 36 | 17.330 | -5.469 | -32.767 | 1.00 | 99.99 | H |
| ATOM | 631 | HZ3 | TRP | A | 36 | 17.784 | -3.657 | -28.900 | 1.00 | 99.99 | H |
| ATOM | 632 | HH2 | TRP | A | 36 | 18.534 | -3.920 | -31.248 | 1.00 | 99.99 | H |
| ATOM | 633 | N   | TRP | A | 37 | 14.411 | -8.041 | -25.512 | 1.00 | 0.00  | N |
| ATOM | 634 | CA  | TRP | A | 37 | 14.083 | -7.992 | -24.058 | 1.00 | 0.00  | C |
| ATOM | 635 | C   | TRP | A | 37 | 14.816 | -6.819 | -23.407 | 1.00 | 0.00  | C |
| ATOM | 636 | O   | TRP | A | 37 | 15.715 | -6.238 | -23.981 | 1.00 | 0.00  | O |
| ATOM | 637 | CB  | TRP | A | 37 | 14.527 | -9.284 | -23.368 | 1.00 | 0.00  | C |

|      |     |     |     |   |    |        |         |         |      |       |   |
|------|-----|-----|-----|---|----|--------|---------|---------|------|-------|---|
| ATOM | 638 | CG  | TRP | A | 37 | 14.637 | -10.400 | -24.355 | 1.00 | 0.00  | C |
| ATOM | 639 | CD1 | TRP | A | 37 | 13.646 | -10.828 | -25.169 | 1.00 | 0.00  | C |
| ATOM | 640 | CD2 | TRP | A | 37 | 15.789 | -11.247 | -24.630 | 1.00 | 0.00  | C |
| ATOM | 641 | CE2 | TRP | A | 37 | 15.434 | -12.180 | -25.631 | 1.00 | 0.00  | C |
| ATOM | 642 | CE3 | TRP | A | 37 | 17.096 | -11.294 | -24.112 | 1.00 | 0.00  | C |
| ATOM | 643 | NE1 | TRP | A | 37 | 14.117 | -11.885 | -25.928 | 1.00 | 0.00  | N |
| ATOM | 644 | CZ2 | TRP | A | 37 | 16.343 | -13.127 | -26.101 | 1.00 | 0.00  | C |
| ATOM | 645 | CZ3 | TRP | A | 37 | 18.014 | -12.245 | -24.583 | 1.00 | 0.00  | C |
| ATOM | 646 | CH2 | TRP | A | 37 | 17.638 | -13.161 | -25.575 | 1.00 | 0.00  | C |
| ATOM | 647 | H   | TRP | A | 37 | 15.321 | -7.854  | -25.822 | 1.00 | 99.99 | H |
| ATOM | 648 | HA  | TRP | A | 37 | 13.015 | -7.873  | -23.940 | 1.00 | 99.99 | H |
| ATOM | 649 | HB2 | TRP | A | 37 | 15.489 | -9.124  | -22.907 | 1.00 | 99.99 | H |
| ATOM | 650 | HB3 | TRP | A | 37 | 13.806 | -9.548  | -22.609 | 1.00 | 99.99 | H |
| ATOM | 651 | HD1 | TRP | A | 37 | 12.650 | -10.413 | -25.220 | 1.00 | 99.99 | H |
| ATOM | 652 | HE1 | TRP | A | 37 | 13.598 | -12.376 | -26.597 | 1.00 | 99.99 | H |
| ATOM | 653 | HE3 | TRP | A | 37 | 17.395 | -10.593 | -23.347 | 1.00 | 99.99 | H |
| ATOM | 654 | HZ2 | TRP | A | 37 | 16.046 | -13.831 | -26.864 | 1.00 | 99.99 | H |
| ATOM | 655 | HZ3 | TRP | A | 37 | 19.015 | -12.272 | -24.178 | 1.00 | 99.99 | H |
| ATOM | 656 | HH2 | TRP | A | 37 | 18.350 | -13.889 | -25.934 | 1.00 | 99.99 | H |
| ATOM | 657 | N   | LYS | A | 38 | 14.453 | -6.483  | -22.202 | 1.00 | 0.00  | N |
| ATOM | 658 | CA  | LYS | A | 38 | 15.141 | -5.367  | -21.498 | 1.00 | 0.00  | C |
| ATOM | 659 | C   | LYS | A | 38 | 15.956 | -5.953  | -20.346 | 1.00 | 0.00  | C |

|      |     |     |          |        |        |         |      |       |     |
|------|-----|-----|----------|--------|--------|---------|------|-------|-----|
| ATOM | 660 | O   | LYS A 38 | 15.425 | -6.578 | -19.450 | 1.00 | 0.00  | O   |
| ATOM | 661 | CB  | LYS A 38 | 14.105 | -4.382 | -20.959 | 1.00 | 0.00  | C   |
| ATOM | 662 | CG  | LYS A 38 | 14.701 | -2.974 | -20.932 | 1.00 | 0.00  | C   |
| ATOM | 663 | CD  | LYS A 38 | 13.656 | -1.989 | -20.403 | 1.00 | 0.00  | C   |
| ATOM | 664 | CE  | LYS A 38 | 13.993 | -0.579 | -20.892 | 1.00 | 0.00  | C   |
| ATOM | 665 | NZ  | LYS A 38 | 13.465 | -0.392 | -22.272 | 1.00 | 0.00  | N1+ |
| ATOM | 666 | H   | LYS A 38 | 13.735 | -6.977 | -21.752 | 1.00 | 99.99 | H   |
| ATOM | 667 | HA  | LYS A 38 | 15.804 | -4.860 | -22.184 | 1.00 | 99.99 | H   |
| ATOM | 668 | HB2 | LYS A 38 | 13.238 | -4.393 | -21.601 | 1.00 | 99.99 | H   |
| ATOM | 669 | HB3 | LYS A 38 | 13.820 | -4.671 | -19.959 | 1.00 | 99.99 | H   |
| ATOM | 670 | HG2 | LYS A 38 | 15.567 | -2.962 | -20.286 | 1.00 | 99.99 | H   |
| ATOM | 671 | HG3 | LYS A 38 | 14.992 | -2.687 | -21.931 | 1.00 | 99.99 | H   |
| ATOM | 672 | HD2 | LYS A 38 | 12.679 | -2.272 | -20.765 | 1.00 | 99.99 | H   |
| ATOM | 673 | HD3 | LYS A 38 | 13.659 | -2.006 | -19.323 | 1.00 | 99.99 | H   |
| ATOM | 674 | HE2 | LYS A 38 | 13.542 | 0.148  | -20.232 | 1.00 | 99.99 | H   |
| ATOM | 675 | HE3 | LYS A 38 | 15.065 | -0.445 | -20.895 | 1.00 | 99.99 | H   |
| ATOM | 676 | HZ1 | LYS A 38 | 12.956 | -1.249 | -22.568 | 1.00 | 99.99 | H   |
| ATOM | 677 | HZ2 | LYS A 38 | 12.815 | 0.420  | -22.288 | 1.00 | 99.99 | H   |
| ATOM | 678 | HZ3 | LYS A 38 | 14.254 | -0.218 | -22.926 | 1.00 | 99.99 | H   |
| ATOM | 679 | N   | ALA A 39 | 17.246 | -5.773 | -20.373 | 1.00 | 0.00  | N   |
| ATOM | 680 | CA  | ALA A 39 | 18.099 | -6.338 | -19.291 | 1.00 | 0.00  | C   |
| ATOM | 681 | C   | ALA A 39 | 18.766 | -5.216 | -18.495 | 1.00 | 0.00  | C   |

|      |     |     |          |        |        |         |      |       |     |
|------|-----|-----|----------|--------|--------|---------|------|-------|-----|
| ATOM | 682 | O   | ALA A 39 | 18.484 | -4.050 | -18.680 | 1.00 | 0.00  | O   |
| ATOM | 683 | CB  | ALA A 39 | 19.177 | -7.231 | -19.909 | 1.00 | 0.00  | C   |
| ATOM | 684 | H   | ALA A 39 | 17.652 | -5.275 | -21.114 | 1.00 | 99.99 | H   |
| ATOM | 685 | HA  | ALA A 39 | 17.495 | -6.930 | -18.620 | 1.00 | 99.99 | H   |
| ATOM | 686 | HB1 | ALA A 39 | 19.061 | -7.244 | -20.983 | 1.00 | 99.99 | H   |
| ATOM | 687 | HB2 | ALA A 39 | 19.075 | -8.236 | -19.524 | 1.00 | 99.99 | H   |
| ATOM | 688 | HB3 | ALA A 39 | 20.153 | -6.845 | -19.656 | 1.00 | 99.99 | H   |
| ATOM | 689 | N   | LYS A 40 | 19.656 | -5.572 | -17.608 | 1.00 | 0.00  | N   |
| ATOM | 690 | CA  | LYS A 40 | 20.357 | -4.545 | -16.787 | 1.00 | 0.00  | C   |
| ATOM | 691 | C   | LYS A 40 | 21.824 | -4.950 | -16.625 | 1.00 | 0.00  | C   |
| ATOM | 692 | O   | LYS A 40 | 22.156 | -6.120 | -16.637 | 1.00 | 0.00  | O   |
| ATOM | 693 | CB  | LYS A 40 | 19.696 | -4.453 | -15.411 | 1.00 | 0.00  | C   |
| ATOM | 694 | CG  | LYS A 40 | 20.052 | -3.114 | -14.761 | 1.00 | 0.00  | C   |
| ATOM | 695 | CD  | LYS A 40 | 19.836 | -3.208 | -13.249 | 1.00 | 0.00  | C   |
| ATOM | 696 | CE  | LYS A 40 | 18.521 | -2.518 | -12.879 | 1.00 | 0.00  | C   |
| ATOM | 697 | NZ  | LYS A 40 | 18.679 | -1.816 | -11.574 | 1.00 | 0.00  | N1+ |
| ATOM | 698 | H   | LYS A 40 | 19.867 | -6.521 | -17.486 | 1.00 | 99.99 | H   |
| ATOM | 699 | HA  | LYS A 40 | 20.298 | -3.588 | -17.283 | 1.00 | 99.99 | H   |
| ATOM | 700 | HB2 | LYS A 40 | 18.624 | -4.525 | -15.521 | 1.00 | 99.99 | H   |
| ATOM | 701 | HB3 | LYS A 40 | 20.049 | -5.261 | -14.787 | 1.00 | 99.99 | H   |
| ATOM | 702 | HG2 | LYS A 40 | 21.087 | -2.880 | -14.963 | 1.00 | 99.99 | H   |
| ATOM | 703 | HG3 | LYS A 40 | 19.421 | -2.338 | -15.168 | 1.00 | 99.99 | H   |

|      |     |     |     |   |    |        |        |         |      |       |   |
|------|-----|-----|-----|---|----|--------|--------|---------|------|-------|---|
| ATOM | 704 | HD2 | LYS | A | 40 | 19.793 | -4.246 | -12.955 | 1.00 | 99.99 | H |
| ATOM | 705 | HD3 | LYS | A | 40 | 20.654 | -2.722 | -12.738 | 1.00 | 99.99 | H |
| ATOM | 706 | HE2 | LYS | A | 40 | 18.262 | -1.802 | -13.644 | 1.00 | 99.99 | H |
| ATOM | 707 | HE3 | LYS | A | 40 | 17.738 | -3.257 | -12.797 | 1.00 | 99.99 | H |
| ATOM | 708 | HZ1 | LYS | A | 40 | 19.479 | -1.154 | -11.630 | 1.00 | 99.99 | H |
| ATOM | 709 | HZ2 | LYS | A | 40 | 17.810 | -1.288 | -11.356 | 1.00 | 99.99 | H |
| ATOM | 710 | HZ3 | LYS | A | 40 | 18.859 | -2.515 | -10.824 | 1.00 | 99.99 | H |
| ATOM | 711 | N   | SER | A | 41 | 22.708 | -3.999 | -16.489 | 1.00 | 0.00  | N |
| ATOM | 712 | CA  | SER | A | 41 | 24.150 | -4.348 | -16.344 | 1.00 | 0.00  | C |
| ATOM | 713 | C   | SER | A | 41 | 24.499 | -4.506 | -14.863 | 1.00 | 0.00  | C |
| ATOM | 714 | O   | SER | A | 41 | 24.257 | -3.623 | -14.065 | 1.00 | 0.00  | O |
| ATOM | 715 | CB  | SER | A | 41 | 25.007 | -3.236 | -16.953 | 1.00 | 0.00  | C |
| ATOM | 716 | OG  | SER | A | 41 | 26.324 | -3.312 | -16.427 | 1.00 | 0.00  | O |
| ATOM | 717 | H   | SER | A | 41 | 22.427 | -3.060 | -16.495 | 1.00 | 99.99 | H |
| ATOM | 718 | HA  | SER | A | 41 | 24.336 | -5.273 | -16.871 | 1.00 | 99.99 | H |
| ATOM | 719 | HB2 | SER | A | 41 | 25.040 | -3.353 | -18.026 | 1.00 | 99.99 | H |
| ATOM | 720 | HB3 | SER | A | 41 | 24.577 | -2.276 | -16.708 | 1.00 | 99.99 | H |
| ATOM | 721 | HG  | SER | A | 41 | 26.888 | -3.705 | -17.097 | 1.00 | 99.99 | H |
| ATOM | 722 | N   | LEU | A | 42 | 25.063 | -5.619 | -14.486 | 1.00 | 0.00  | N |
| ATOM | 723 | CA  | LEU | A | 42 | 25.418 | -5.816 | -13.052 | 1.00 | 0.00  | C |
| ATOM | 724 | C   | LEU | A | 42 | 26.568 | -4.876 | -12.680 | 1.00 | 0.00  | C |
| ATOM | 725 | O   | LEU | A | 42 | 26.888 | -4.697 | -11.522 | 1.00 | 0.00  | O |

|      |     |      |     |   |    |        |        |         |      |       |   |
|------|-----|------|-----|---|----|--------|--------|---------|------|-------|---|
| ATOM | 726 | CB   | LEU | A | 42 | 25.847 | -7.266 | -12.824 | 1.00 | 0.00  | C |
| ATOM | 727 | CG   | LEU | A | 42 | 25.071 | -7.847 | -11.641 | 1.00 | 0.00  | C |
| ATOM | 728 | CD1  | LEU | A | 42 | 23.725 | -8.387 | -12.129 | 1.00 | 0.00  | C |
| ATOM | 729 | CD2  | LEU | A | 42 | 25.878 | -8.982 | -11.009 | 1.00 | 0.00  | C |
| ATOM | 730 | H    | LEU | A | 42 | 25.247 | -6.323 | -15.142 | 1.00 | 99.99 | H |
| ATOM | 731 | HA   | LEU | A | 42 | 24.555 | -5.595 | -12.442 | 1.00 | 99.99 | H |
| ATOM | 732 | HB2  | LEU | A | 42 | 25.640 | -7.847 | -13.711 | 1.00 | 99.99 | H |
| ATOM | 733 | HB3  | LEU | A | 42 | 26.906 | -7.299 | -12.612 | 1.00 | 99.99 | H |
| ATOM | 734 | HG   | LEU | A | 42 | 24.903 | -7.073 | -10.906 | 1.00 | 99.99 | H |
| ATOM | 735 | HD11 | LEU | A | 42 | 23.885 | -9.044 | -12.971 | 1.00 | 99.99 | H |
| ATOM | 736 | HD12 | LEU | A | 42 | 23.247 | -8.936 | -11.331 | 1.00 | 99.99 | H |
| ATOM | 737 | HD13 | LEU | A | 42 | 23.094 | -7.564 | -12.429 | 1.00 | 99.99 | H |
| ATOM | 738 | HD21 | LEU | A | 42 | 26.844 | -9.047 | -11.488 | 1.00 | 99.99 | H |
| ATOM | 739 | HD22 | LEU | A | 42 | 26.011 | -8.786 | -9.955  | 1.00 | 99.99 | H |
| ATOM | 740 | HD23 | LEU | A | 42 | 25.350 | -9.915 | -11.138 | 1.00 | 99.99 | H |
| ATOM | 741 | N    | LEU | A | 43 | 27.194 | -4.276 | -13.657 | 1.00 | 0.00  | N |
| ATOM | 742 | CA   | LEU | A | 43 | 28.325 | -3.350 | -13.367 | 1.00 | 0.00  | C |
| ATOM | 743 | C    | LEU | A | 43 | 27.780 | -1.966 | -13.013 | 1.00 | 0.00  | C |
| ATOM | 744 | O    | LEU | A | 43 | 28.075 | -1.418 | -11.970 | 1.00 | 0.00  | O |
| ATOM | 745 | CB   | LEU | A | 43 | 29.223 | -3.242 | -14.602 | 1.00 | 0.00  | C |
| ATOM | 746 | CG   | LEU | A | 43 | 30.233 | -2.111 | -14.401 | 1.00 | 0.00  | C |
| ATOM | 747 | CD1  | LEU | A | 43 | 31.199 | -2.484 | -13.275 | 1.00 | 0.00  | C |

|      |     |      |     |   |    |        |        |         |      |       |   |
|------|-----|------|-----|---|----|--------|--------|---------|------|-------|---|
| ATOM | 748 | CD2  | LEU | A | 43 | 31.020 | -1.894 | -15.696 | 1.00 | 0.00  | C |
| ATOM | 749 | H    | LEU | A | 43 | 26.920 | -4.437 | -14.584 | 1.00 | 99.99 | H |
| ATOM | 750 | HA   | LEU | A | 43 | 28.900 | -3.728 | -12.539 | 1.00 | 99.99 | H |
| ATOM | 751 | HB2  | LEU | A | 43 | 29.749 | -4.174 | -14.747 | 1.00 | 99.99 | H |
| ATOM | 752 | HB3  | LEU | A | 43 | 28.616 | -3.032 | -15.470 | 1.00 | 99.99 | H |
| ATOM | 753 | HG   | LEU | A | 43 | 29.710 | -1.202 | -14.141 | 1.00 | 99.99 | H |
| ATOM | 754 | HD11 | LEU | A | 43 | 31.665 | -3.432 | -13.499 | 1.00 | 99.99 | H |
| ATOM | 755 | HD12 | LEU | A | 43 | 31.959 | -1.722 | -13.185 | 1.00 | 99.99 | H |
| ATOM | 756 | HD13 | LEU | A | 43 | 30.655 | -2.560 | -12.345 | 1.00 | 99.99 | H |
| ATOM | 757 | HD21 | LEU | A | 43 | 31.037 | -2.811 | -16.265 | 1.00 | 99.99 | H |
| ATOM | 758 | HD22 | LEU | A | 43 | 30.546 | -1.117 | -16.279 | 1.00 | 99.99 | H |
| ATOM | 759 | HD23 | LEU | A | 43 | 32.031 | -1.599 | -15.457 | 1.00 | 99.99 | H |
| ATOM | 760 | N    | THR | A | 44 | 26.985 | -1.400 | -13.874 | 1.00 | 0.00  | N |
| ATOM | 761 | CA   | THR | A | 44 | 26.415 | -0.052 | -13.592 | 1.00 | 0.00  | C |
| ATOM | 762 | C    | THR | A | 44 | 24.922 | -0.188 | -13.291 | 1.00 | 0.00  | C |
| ATOM | 763 | O    | THR | A | 44 | 24.211 | 0.790  | -13.167 | 1.00 | 0.00  | O |
| ATOM | 764 | CB   | THR | A | 44 | 26.614 | 0.855  | -14.809 | 1.00 | 0.00  | C |
| ATOM | 765 | CG2  | THR | A | 44 | 26.316 | 0.069  | -16.086 | 1.00 | 0.00  | C |
| ATOM | 766 | OG1  | THR | A | 44 | 25.734 | 1.967  | -14.717 | 1.00 | 0.00  | O |
| ATOM | 767 | H    | THR | A | 44 | 26.759 | -1.863 | -14.705 | 1.00 | 99.99 | H |
| ATOM | 768 | HA   | THR | A | 44 | 26.910 | 0.379  | -12.734 | 1.00 | 99.99 | H |
| ATOM | 769 | HB   | THR | A | 44 | 27.634 | 1.204  | -14.835 | 1.00 | 99.99 | H |



|      |     |      |     |   |    |        |        |         |      |       |     |
|------|-----|------|-----|---|----|--------|--------|---------|------|-------|-----|
| ATOM | 770 | HG1  | THR | A | 44 | 25.536 | 2.262  | -15.609 | 1.00 | 99.99 | H   |
| ATOM | 771 | HG21 | THR | A | 44 | 25.655 | -0.754 | -15.857 | 1.00 | 99.99 | H   |
| ATOM | 772 | HG22 | THR | A | 44 | 25.845 | 0.720  | -16.808 | 1.00 | 99.99 | H   |
| ATOM | 773 | HG23 | THR | A | 44 | 27.239 | -0.314 | -16.496 | 1.00 | 99.99 | H   |
| ATOM | 774 | N    | LYS | A | 45 | 24.443 | -1.394 | -13.166 | 1.00 | 0.00  | N   |
| ATOM | 775 | CA   | LYS | A | 45 | 22.999 | -1.602 | -12.865 | 1.00 | 0.00  | C   |
| ATOM | 776 | C    | LYS | A | 45 | 22.142 | -0.803 | -13.845 | 1.00 | 0.00  | C   |
| ATOM | 777 | O    | LYS | A | 45 | 21.014 | -0.457 | -13.555 | 1.00 | 0.00  | O   |
| ATOM | 778 | CB   | LYS | A | 45 | 22.707 | -1.136 | -11.438 | 1.00 | 0.00  | C   |
| ATOM | 779 | CG   | LYS | A | 45 | 23.846 | -1.575 | -10.516 | 1.00 | 0.00  | C   |
| ATOM | 780 | CD   | LYS | A | 45 | 23.317 | -1.733 | -9.089  | 1.00 | 0.00  | C   |
| ATOM | 781 | CE   | LYS | A | 45 | 23.350 | -0.378 | -8.380  | 1.00 | 0.00  | C   |
| ATOM | 782 | NZ   | LYS | A | 45 | 23.000 | -0.560 | -6.943  | 1.00 | 0.00  | N1+ |
| ATOM | 783 | H    | LYS | A | 45 | 25.033 | -2.170 | -13.265 | 1.00 | 99.99 | H   |
| ATOM | 784 | HA   | LYS | A | 45 | 22.769 | -2.654 | -12.952 | 1.00 | 99.99 | H   |
| ATOM | 785 | HB2  | LYS | A | 45 | 22.624 | -0.060 | -11.419 | 1.00 | 99.99 | H   |
| ATOM | 786 | HB3  | LYS | A | 45 | 21.780 | -1.575 | -11.099 | 1.00 | 99.99 | H   |
| ATOM | 787 | HG2  | LYS | A | 45 | 24.243 | -2.520 | -10.859 | 1.00 | 99.99 | H   |
| ATOM | 788 | HG3  | LYS | A | 45 | 24.628 | -0.830 | -10.529 | 1.00 | 99.99 | H   |
| ATOM | 789 | HD2  | LYS | A | 45 | 22.300 | -2.098 | -9.121  | 1.00 | 99.99 | H   |
| ATOM | 790 | HD3  | LYS | A | 45 | 23.935 | -2.436 | -8.551  | 1.00 | 99.99 | H   |
| ATOM | 791 | HE2  | LYS | A | 45 | 24.341 | 0.045  | -8.458  | 1.00 | 99.99 | H   |

|      |     |     |     |   |    |        |        |         |      |       |     |
|------|-----|-----|-----|---|----|--------|--------|---------|------|-------|-----|
| ATOM | 792 | HE3 | LYS | A | 45 | 22.637 | 0.289  | -8.843  | 1.00 | 99.99 | H   |
| ATOM | 793 | HZ1 | LYS | A | 45 | 23.527 | -1.369 | -6.558  | 1.00 | 99.99 | H   |
| ATOM | 794 | HZ2 | LYS | A | 45 | 23.249 | 0.301  | -6.414  | 1.00 | 99.99 | H   |
| ATOM | 795 | HZ3 | LYS | A | 45 | 21.980 | -0.740 | -6.855  | 1.00 | 99.99 | H   |
| ATOM | 796 | N   | LYS | A | 46 | 22.656 | -0.518 | -15.008 | 1.00 | 0.00  | N   |
| ATOM | 797 | CA  | LYS | A | 46 | 21.851 | 0.244  | -16.000 | 1.00 | 0.00  | C   |
| ATOM | 798 | C   | LYS | A | 46 | 20.925 | -0.732 | -16.720 | 1.00 | 0.00  | C   |
| ATOM | 799 | O   | LYS | A | 46 | 21.281 | -1.867 | -16.963 | 1.00 | 0.00  | O   |
| ATOM | 800 | CB  | LYS | A | 46 | 22.781 | 0.915  | -17.013 | 1.00 | 0.00  | C   |
| ATOM | 801 | CG  | LYS | A | 46 | 22.330 | 2.359  | -17.238 | 1.00 | 0.00  | C   |
| ATOM | 802 | CD  | LYS | A | 46 | 23.360 | 3.087  | -18.104 | 1.00 | 0.00  | C   |
| ATOM | 803 | CE  | LYS | A | 46 | 22.786 | 4.430  | -18.559 | 1.00 | 0.00  | C   |
| ATOM | 804 | NZ  | LYS | A | 46 | 21.566 | 4.195  | -19.382 | 1.00 | 0.00  | N1+ |
| ATOM | 805 | H   | LYS | A | 46 | 23.561 | -0.817 | -15.235 | 1.00 | 99.99 | H   |
| ATOM | 806 | HA  | LYS | A | 46 | 21.264 | 0.994  | -15.491 | 1.00 | 99.99 | H   |
| ATOM | 807 | HB2 | LYS | A | 46 | 23.792 | 0.909  | -16.633 | 1.00 | 99.99 | H   |
| ATOM | 808 | HB3 | LYS | A | 46 | 22.744 | 0.376  | -17.947 | 1.00 | 99.99 | H   |
| ATOM | 809 | HG2 | LYS | A | 46 | 21.373 | 2.363  | -17.739 | 1.00 | 99.99 | H   |
| ATOM | 810 | HG3 | LYS | A | 46 | 22.241 | 2.862  | -16.287 | 1.00 | 99.99 | H   |
| ATOM | 811 | HD2 | LYS | A | 46 | 24.259 | 3.255  | -17.529 | 1.00 | 99.99 | H   |
| ATOM | 812 | HD3 | LYS | A | 46 | 23.594 | 2.484  | -18.969 | 1.00 | 99.99 | H   |
| ATOM | 813 | HE2 | LYS | A | 46 | 22.528 | 5.022  | -17.693 | 1.00 | 99.99 | H   |

|      |     |     |     |   |    |        |        |         |      |       |     |
|------|-----|-----|-----|---|----|--------|--------|---------|------|-------|-----|
| ATOM | 814 | HE3 | LYS | A | 46 | 23.523 | 4.956  | -19.148 | 1.00 | 99.99 | H   |
| ATOM | 815 | HZ1 | LYS | A | 46 | 21.541 | 3.202  | -19.689 | 1.00 | 99.99 | H   |
| ATOM | 816 | HZ2 | LYS | A | 46 | 20.720 | 4.405  | -18.814 | 1.00 | 99.99 | H   |
| ATOM | 817 | HZ3 | LYS | A | 46 | 21.587 | 4.814  | -20.217 | 1.00 | 99.99 | H   |
| ATOM | 818 | N   | GLU | A | 47 | 19.740 | -0.312 | -17.063 | 1.00 | 0.00  | N   |
| ATOM | 819 | CA  | GLU | A | 47 | 18.807 | -1.237 | -17.762 | 1.00 | 0.00  | C   |
| ATOM | 820 | C   | GLU | A | 47 | 18.426 | -0.646 | -19.120 | 1.00 | 0.00  | C   |
| ATOM | 821 | O   | GLU | A | 47 | 18.312 | 0.554  | -19.277 | 1.00 | 0.00  | O   |
| ATOM | 822 | CB  | GLU | A | 47 | 17.549 | -1.433 | -16.913 | 1.00 | 0.00  | C   |
| ATOM | 823 | CG  | GLU | A | 47 | 16.752 | -2.626 | -17.445 | 1.00 | 0.00  | C   |
| ATOM | 824 | CD  | GLU | A | 47 | 15.313 | -2.546 | -16.933 | 1.00 | 0.00  | C   |
| ATOM | 825 | OE1 | GLU | A | 47 | 15.120 | -2.033 | -15.844 | 1.00 | 0.00  | O   |
| ATOM | 826 | OE2 | GLU | A | 47 | 14.428 | -3.000 | -17.640 | 1.00 | 0.00  | O1- |
| ATOM | 827 | H   | GLU | A | 47 | 19.464 | 0.607  | -16.864 | 1.00 | 99.99 | H   |
| ATOM | 828 | HA  | GLU | A | 47 | 19.296 | -2.188 | -17.912 | 1.00 | 99.99 | H   |
| ATOM | 829 | HB2 | GLU | A | 47 | 17.832 | -1.618 | -15.888 | 1.00 | 99.99 | H   |
| ATOM | 830 | HB3 | GLU | A | 47 | 16.939 | -0.543 | -16.963 | 1.00 | 99.99 | H   |
| ATOM | 831 | HG2 | GLU | A | 47 | 16.752 | -2.606 | -18.525 | 1.00 | 99.99 | H   |
| ATOM | 832 | HG3 | GLU | A | 47 | 17.206 | -3.544 | -17.102 | 1.00 | 99.99 | H   |
| ATOM | 833 | N   | GLY | A | 48 | 18.234 | -1.480 | -20.104 | 1.00 | 0.00  | N   |
| ATOM | 834 | CA  | GLY | A | 48 | 17.869 | -0.967 | -21.453 | 1.00 | 0.00  | C   |
| ATOM | 835 | C   | GLY | A | 48 | 17.339 | -2.116 | -22.306 | 1.00 | 0.00  | C   |

|      |     |     |          |        |        |         |      |       |   |
|------|-----|-----|----------|--------|--------|---------|------|-------|---|
| ATOM | 836 | O   | GLY A 48 | 17.051 | -3.189 | -21.815 | 1.00 | 0.00  | O |
| ATOM | 837 | H   | GLY A 48 | 18.336 | -2.444 | -19.956 | 1.00 | 99.99 | H |
| ATOM | 838 | HA2 | GLY A 48 | 18.742 | -0.542 | -21.925 | 1.00 | 99.99 | H |
| ATOM | 839 | HA3 | GLY A 48 | 17.106 | -0.209 | -21.359 | 1.00 | 99.99 | H |
| ATOM | 840 | N   | PHE A 49 | 17.213 | -1.901 | -23.583 | 1.00 | 0.00  | N |
| ATOM | 841 | CA  | PHE A 49 | 16.704 | -2.983 | -24.468 | 1.00 | 0.00  | C |
| ATOM | 842 | C   | PHE A 49 | 17.884 | -3.707 | -25.118 | 1.00 | 0.00  | C |
| ATOM | 843 | O   | PHE A 49 | 18.813 | -3.095 | -25.606 | 1.00 | 0.00  | O |
| ATOM | 844 | CB  | PHE A 49 | 15.804 | -2.384 | -25.551 | 1.00 | 0.00  | C |
| ATOM | 845 | CG  | PHE A 49 | 14.526 | -3.185 | -25.647 | 1.00 | 0.00  | C |
| ATOM | 846 | CD1 | PHE A 49 | 13.904 | -3.653 | -24.483 | 1.00 | 0.00  | C |
| ATOM | 847 | CD2 | PHE A 49 | 13.964 | -3.458 | -26.899 | 1.00 | 0.00  | C |
| ATOM | 848 | CE1 | PHE A 49 | 12.719 | -4.394 | -24.573 | 1.00 | 0.00  | C |
| ATOM | 849 | CE2 | PHE A 49 | 12.780 | -4.199 | -26.989 | 1.00 | 0.00  | C |
| ATOM | 850 | CZ  | PHE A 49 | 12.157 | -4.667 | -25.826 | 1.00 | 0.00  | C |
| ATOM | 851 | H   | PHE A 49 | 17.461 | -1.028 | -23.955 | 1.00 | 99.99 | H |
| ATOM | 852 | HA  | PHE A 49 | 16.141 | -3.688 | -23.874 | 1.00 | 99.99 | H |
| ATOM | 853 | HB2 | PHE A 49 | 15.569 | -1.361 | -25.298 | 1.00 | 99.99 | H |
| ATOM | 854 | HB3 | PHE A 49 | 16.317 | -2.411 | -26.501 | 1.00 | 99.99 | H |
| ATOM | 855 | HD1 | PHE A 49 | 14.337 | -3.443 | -23.517 | 1.00 | 99.99 | H |
| ATOM | 856 | HD2 | PHE A 49 | 14.445 | -3.097 | -27.797 | 1.00 | 99.99 | H |
| ATOM | 857 | HE1 | PHE A 49 | 12.239 | -4.755 | -23.675 | 1.00 | 99.99 | H |

|      |     |      |     |   |    |        |        |         |      |       |   |
|------|-----|------|-----|---|----|--------|--------|---------|------|-------|---|
| ATOM | 858 | HE2  | PHE | A | 49 | 12.347 | -4.410 | -27.955 | 1.00 | 99.99 | H |
| ATOM | 859 | HZ   | PHE | A | 49 | 11.244 | -5.239 | -25.895 | 1.00 | 99.99 | H |
| ATOM | 860 | N    | ILE | A | 50 | 17.850 | -5.010 | -25.123 | 1.00 | 0.00  | N |
| ATOM | 861 | CA   | ILE | A | 50 | 18.965 | -5.789 | -25.737 | 1.00 | 0.00  | C |
| ATOM | 862 | C    | ILE | A | 50 | 18.393 | -6.762 | -26.769 | 1.00 | 0.00  | C |
| ATOM | 863 | O    | ILE | A | 50 | 17.336 | -7.328 | -26.573 | 1.00 | 0.00  | O |
| ATOM | 864 | CB   | ILE | A | 50 | 19.689 | -6.580 | -24.645 | 1.00 | 0.00  | C |
| ATOM | 865 | CG1  | ILE | A | 50 | 18.686 | -7.474 | -23.911 | 1.00 | 0.00  | C |
| ATOM | 866 | CG2  | ILE | A | 50 | 20.330 | -5.609 | -23.652 | 1.00 | 0.00  | C |
| ATOM | 867 | CD1  | ILE | A | 50 | 19.421 | -8.664 | -23.292 | 1.00 | 0.00  | C |
| ATOM | 868 | H    | ILE | A | 50 | 17.085 | -5.479 | -24.722 | 1.00 | 99.99 | H |
| ATOM | 869 | HA   | ILE | A | 50 | 19.663 | -5.116 | -26.213 | 1.00 | 99.99 | H |
| ATOM | 870 | HB   | ILE | A | 50 | 20.456 | -7.194 | -25.094 | 1.00 | 99.99 | H |
| ATOM | 871 | HG12 | ILE | A | 50 | 18.201 | -6.906 | -23.132 | 1.00 | 99.99 | H |
| ATOM | 872 | HG13 | ILE | A | 50 | 17.945 | -7.833 | -24.610 | 1.00 | 99.99 | H |
| ATOM | 873 | HG21 | ILE | A | 50 | 19.960 | -4.611 | -23.835 | 1.00 | 99.99 | H |
| ATOM | 874 | HG22 | ILE | A | 50 | 20.078 | -5.906 | -22.644 | 1.00 | 99.99 | H |
| ATOM | 875 | HG23 | ILE | A | 50 | 21.403 | -5.624 | -23.774 | 1.00 | 99.99 | H |
| ATOM | 876 | HD11 | ILE | A | 50 | 20.443 | -8.386 | -23.081 | 1.00 | 99.99 | H |
| ATOM | 877 | HD12 | ILE | A | 50 | 18.930 | -8.954 | -22.375 | 1.00 | 99.99 | H |
| ATOM | 878 | HD13 | ILE | A | 50 | 19.410 | -9.494 | -23.984 | 1.00 | 99.99 | H |
| ATOM | 879 | N    | PRO | A | 51 | 19.102 | -6.963 | -27.892 | 1.00 | 0.00  | N |

|      |     |     |       |    |        |         |         |      |       |   |
|------|-----|-----|-------|----|--------|---------|---------|------|-------|---|
| ATOM | 880 | CA  | PRO A | 51 | 18.644 | -7.874  | -28.942 | 1.00 | 0.00  | C |
| ATOM | 881 | C   | PRO A | 51 | 18.858 | -9.333  | -28.528 | 1.00 | 0.00  | C |
| ATOM | 882 | O   | PRO A | 51 | 19.677 | -9.622  | -27.678 | 1.00 | 0.00  | O |
| ATOM | 883 | CB  | PRO A | 51 | 19.532 | -7.526  | -30.133 | 1.00 | 0.00  | C |
| ATOM | 884 | CG  | PRO A | 51 | 20.775 | -6.951  | -29.534 | 1.00 | 0.00  | C |
| ATOM | 885 | CD  | PRO A | 51 | 20.387 | -6.324  | -28.220 | 1.00 | 0.00  | C |
| ATOM | 886 | HA  | PRO A | 51 | 17.613 | -7.686  | -29.193 | 1.00 | 99.99 | H |
| ATOM | 887 | HB2 | PRO A | 51 | 19.742 | -8.420  | -30.701 | 1.00 | 99.99 | H |
| ATOM | 888 | HB3 | PRO A | 51 | 19.027 | -6.808  | -30.763 | 1.00 | 99.99 | H |
| ATOM | 889 | HG2 | PRO A | 51 | 21.497 | -7.738  | -29.380 | 1.00 | 99.99 | H |
| ATOM | 890 | HG3 | PRO A | 51 | 21.187 | -6.209  | -30.201 | 1.00 | 99.99 | H |
| ATOM | 891 | HD2 | PRO A | 51 | 21.134 | -6.534  | -27.468 | 1.00 | 99.99 | H |
| ATOM | 892 | HD3 | PRO A | 51 | 20.280 | -5.255  | -28.330 | 1.00 | 99.99 | H |
| ATOM | 893 | N   | SER A | 52 | 18.138 | -10.259 | -29.098 | 1.00 | 0.00  | N |
| ATOM | 894 | CA  | SER A | 52 | 18.331 | -11.678 | -28.693 | 1.00 | 0.00  | C |
| ATOM | 895 | C   | SER A | 52 | 19.410 | -12.333 | -29.560 | 1.00 | 0.00  | C |
| ATOM | 896 | O   | SER A | 52 | 19.394 | -13.528 | -29.782 | 1.00 | 0.00  | O |
| ATOM | 897 | CB  | SER A | 52 | 17.016 | -12.436 | -28.845 | 1.00 | 0.00  | C |
| ATOM | 898 | OG  | SER A | 52 | 17.204 | -13.790 | -28.462 | 1.00 | 0.00  | O |
| ATOM | 899 | H   | SER A | 52 | 17.469 | -10.026 | -29.775 | 1.00 | 99.99 | H |
| ATOM | 900 | HA  | SER A | 52 | 18.654 | -11.699 | -27.664 | 1.00 | 99.99 | H |
| ATOM | 901 | HB2 | SER A | 52 | 16.266 | -11.980 | -28.217 | 1.00 | 99.99 | H |

|      |     |      |     |   |    |        |         |         |      |       |   |
|------|-----|------|-----|---|----|--------|---------|---------|------|-------|---|
| ATOM | 902 | HB3  | SER | A | 52 | 16.694 | -12.395 | -29.875 | 1.00 | 99.99 | H |
| ATOM | 903 | HG   | SER | A | 52 | 17.924 | -13.822 | -27.828 | 1.00 | 99.99 | H |
| ATOM | 904 | N    | ASN | A | 53 | 20.353 | -11.571 | -30.042 | 1.00 | 0.00  | N |
| ATOM | 905 | CA   | ASN | A | 53 | 21.430 | -12.171 | -30.880 | 1.00 | 0.00  | C |
| ATOM | 906 | C    | ASN | A | 53 | 22.785 | -11.582 | -30.477 | 1.00 | 0.00  | C |
| ATOM | 907 | O    | ASN | A | 53 | 23.812 | -11.939 | -31.020 | 1.00 | 0.00  | O |
| ATOM | 908 | CB   | ASN | A | 53 | 21.162 | -11.879 | -32.355 | 1.00 | 0.00  | C |
| ATOM | 909 | CG   | ASN | A | 53 | 21.944 | -12.867 | -33.222 | 1.00 | 0.00  | C |
| ATOM | 910 | ND2  | ASN | A | 53 | 21.306 | -13.829 | -33.832 | 1.00 | 0.00  | N |
| ATOM | 911 | OD1  | ASN | A | 53 | 23.148 | -12.764 | -33.346 | 1.00 | 0.00  | O |
| ATOM | 912 | H    | ASN | A | 53 | 20.355 | -10.610 | -29.850 | 1.00 | 99.99 | H |
| ATOM | 913 | HA   | ASN | A | 53 | 21.452 | -13.238 | -30.713 | 1.00 | 99.99 | H |
| ATOM | 914 | HB2  | ASN | A | 53 | 20.106 | -11.979 | -32.556 | 1.00 | 99.99 | H |
| ATOM | 915 | HB3  | ASN | A | 53 | 21.478 | -10.871 | -32.580 | 1.00 | 99.99 | H |
| ATOM | 916 | HD21 | ASN | A | 53 | 20.334 | -13.912 | -33.731 | 1.00 | 99.99 | H |
| ATOM | 917 | HD22 | ASN | A | 53 | 21.797 | -14.467 | -34.389 | 1.00 | 99.99 | H |
| ATOM | 918 | N    | TYR | A | 54 | 22.800 | -10.691 | -29.524 | 1.00 | 0.00  | N |
| ATOM | 919 | CA   | TYR | A | 54 | 24.092 | -10.092 | -29.084 | 1.00 | 0.00  | C |
| ATOM | 920 | C    | TYR | A | 54 | 24.475 | -10.667 | -27.717 | 1.00 | 0.00  | C |
| ATOM | 921 | O    | TYR | A | 54 | 25.634 | -10.718 | -27.356 | 1.00 | 0.00  | O |
| ATOM | 922 | CB   | TYR | A | 54 | 23.945 | -8.574  | -28.975 | 1.00 | 0.00  | C |
| ATOM | 923 | CG   | TYR | A | 54 | 24.064 | -7.955  | -30.347 | 1.00 | 0.00  | C |

|      |     |     |     |   |    |        |         |         |      |       |   |
|------|-----|-----|-----|---|----|--------|---------|---------|------|-------|---|
| ATOM | 924 | CD1 | TYR | A | 54 | 23.154 | -8.302  | -31.353 | 1.00 | 0.00  | C |
| ATOM | 925 | CD2 | TYR | A | 54 | 25.085 | -7.035  | -30.614 | 1.00 | 0.00  | C |
| ATOM | 926 | CE1 | TYR | A | 54 | 23.265 | -7.728  | -32.626 | 1.00 | 0.00  | C |
| ATOM | 927 | CE2 | TYR | A | 54 | 25.196 | -6.461  | -31.887 | 1.00 | 0.00  | C |
| ATOM | 928 | CZ  | TYR | A | 54 | 24.286 | -6.808  | -32.893 | 1.00 | 0.00  | C |
| ATOM | 929 | OH  | TYR | A | 54 | 24.395 | -6.243  | -34.147 | 1.00 | 0.00  | O |
| ATOM | 930 | H   | TYR | A | 54 | 21.964 | -10.421 | -29.094 | 1.00 | 99.99 | H |
| ATOM | 931 | HA  | TYR | A | 54 | 24.863 | -10.330 | -29.803 | 1.00 | 99.99 | H |
| ATOM | 932 | HB2 | TYR | A | 54 | 22.980 | -8.335  | -28.554 | 1.00 | 99.99 | H |
| ATOM | 933 | HB3 | TYR | A | 54 | 24.722 | -8.182  | -28.335 | 1.00 | 99.99 | H |
| ATOM | 934 | HD1 | TYR | A | 54 | 22.367 | -9.012  | -31.148 | 1.00 | 99.99 | H |
| ATOM | 935 | HD2 | TYR | A | 54 | 25.787 | -6.767  | -29.838 | 1.00 | 99.99 | H |
| ATOM | 936 | HE1 | TYR | A | 54 | 22.563 | -7.996  | -33.402 | 1.00 | 99.99 | H |
| ATOM | 937 | HE2 | TYR | A | 54 | 25.984 | -5.752  | -32.092 | 1.00 | 99.99 | H |
| ATOM | 938 | HH  | TYR | A | 54 | 25.078 | -5.569  | -34.110 | 1.00 | 99.99 | H |
| ATOM | 939 | N   | VAL | A | 55 | 23.507 | -11.101 | -26.955 | 1.00 | 0.00  | N |
| ATOM | 940 | CA  | VAL | A | 55 | 23.809 | -11.676 | -25.612 | 1.00 | 0.00  | C |
| ATOM | 941 | C   | VAL | A | 55 | 23.239 | -13.092 | -25.523 | 1.00 | 0.00  | C |
| ATOM | 942 | O   | VAL | A | 55 | 22.415 | -13.491 | -26.322 | 1.00 | 0.00  | O |
| ATOM | 943 | CB  | VAL | A | 55 | 23.167 | -10.806 | -24.530 | 1.00 | 0.00  | C |
| ATOM | 944 | CG1 | VAL | A | 55 | 23.657 | -9.365  | -24.676 | 1.00 | 0.00  | C |
| ATOM | 945 | CG2 | VAL | A | 55 | 21.644 | -10.847 | -24.681 | 1.00 | 0.00  | C |



|      |     |      |          |        |         |         |      |       |   |
|------|-----|------|----------|--------|---------|---------|------|-------|---|
| ATOM | 946 | H    | VAL A 55 | 22.580 | -11.052 | -27.269 | 1.00 | 99.99 | H |
| ATOM | 947 | HA   | VAL A 55 | 24.879 | -11.706 | -25.464 | 1.00 | 99.99 | H |
| ATOM | 948 | HB   | VAL A 55 | 23.442 | -11.183 | -23.556 | 1.00 | 99.99 | H |
| ATOM | 949 | HG11 | VAL A 55 | 24.065 | -9.222  | -25.666 | 1.00 | 99.99 | H |
| ATOM | 950 | HG12 | VAL A 55 | 22.831 | -8.687  | -24.525 | 1.00 | 99.99 | H |
| ATOM | 951 | HG13 | VAL A 55 | 24.423 | -9.170  | -23.939 | 1.00 | 99.99 | H |
| ATOM | 952 | HG21 | VAL A 55 | 21.349 | -11.788 | -25.123 | 1.00 | 99.99 | H |
| ATOM | 953 | HG22 | VAL A 55 | 21.183 | -10.747 | -23.710 | 1.00 | 99.99 | H |
| ATOM | 954 | HG23 | VAL A 55 | 21.323 | -10.035 | -25.317 | 1.00 | 99.99 | H |
| ATOM | 955 | N    | ALA A 56 | 23.663 | -13.857 | -24.552 | 1.00 | 0.00  | N |
| ATOM | 956 | CA   | ALA A 56 | 23.132 | -15.243 | -24.416 | 1.00 | 0.00  | C |
| ATOM | 957 | C    | ALA A 56 | 23.382 | -15.755 | -22.998 | 1.00 | 0.00  | C |
| ATOM | 958 | O    | ALA A 56 | 23.691 | -15.000 | -22.097 | 1.00 | 0.00  | O |
| ATOM | 959 | CB   | ALA A 56 | 23.824 | -16.162 | -25.424 | 1.00 | 0.00  | C |
| ATOM | 960 | H    | ALA A 56 | 24.326 | -13.517 | -23.912 | 1.00 | 99.99 | H |
| ATOM | 961 | HA   | ALA A 56 | 22.070 | -15.237 | -24.601 | 1.00 | 99.99 | H |
| ATOM | 962 | HB1  | ALA A 56 | 23.706 | -15.759 | -26.419 | 1.00 | 99.99 | H |
| ATOM | 963 | HB2  | ALA A 56 | 23.379 | -17.146 | -25.380 | 1.00 | 99.99 | H |
| ATOM | 964 | HB3  | ALA A 56 | 24.875 | -16.231 | -25.187 | 1.00 | 99.99 | H |
| ATOM | 965 | N    | LYS A 57 | 23.246 | -17.034 | -22.795 | 1.00 | 0.00  | N |
| ATOM | 966 | CA   | LYS A 57 | 23.469 | -17.605 | -21.436 | 1.00 | 0.00  | C |
| ATOM | 967 | C    | LYS A 57 | 24.940 | -17.993 | -21.277 | 1.00 | 0.00  | C |

|      |     |     |          |        |         |         |      |       |     |
|------|-----|-----|----------|--------|---------|---------|------|-------|-----|
| ATOM | 968 | O   | LYS A 57 | 25.504 | -18.681 | -22.104 | 1.00 | 0.00  | O   |
| ATOM | 969 | CB  | LYS A 57 | 22.593 | -18.847 | -21.254 | 1.00 | 0.00  | C   |
| ATOM | 970 | CG  | LYS A 57 | 21.128 | -18.478 | -21.493 | 1.00 | 0.00  | C   |
| ATOM | 971 | CD  | LYS A 57 | 20.272 | -19.747 | -21.465 | 1.00 | 0.00  | C   |
| ATOM | 972 | CE  | LYS A 57 | 18.861 | -19.421 | -21.959 | 1.00 | 0.00  | C   |
| ATOM | 973 | NZ  | LYS A 57 | 18.225 | -20.657 | -22.494 | 1.00 | 0.00  | N1+ |
| ATOM | 974 | H   | LYS A 57 | 22.997 | -17.621 | -23.539 | 1.00 | 99.99 | H   |
| ATOM | 975 | HA  | LYS A 57 | 23.209 | -16.869 | -20.689 | 1.00 | 99.99 | H   |
| ATOM | 976 | HB2 | LYS A 57 | 22.893 | -19.606 | -21.962 | 1.00 | 99.99 | H   |
| ATOM | 977 | HB3 | LYS A 57 | 22.710 | -19.226 | -20.250 | 1.00 | 99.99 | H   |
| ATOM | 978 | HG2 | LYS A 57 | 20.796 | -17.803 | -20.718 | 1.00 | 99.99 | H   |
| ATOM | 979 | HG3 | LYS A 57 | 21.029 | -17.998 | -22.455 | 1.00 | 99.99 | H   |
| ATOM | 980 | HD2 | LYS A 57 | 20.715 | -20.494 | -22.107 | 1.00 | 99.99 | H   |
| ATOM | 981 | HD3 | LYS A 57 | 20.221 | -20.125 | -20.455 | 1.00 | 99.99 | H   |
| ATOM | 982 | HE2 | LYS A 57 | 18.272 | -19.039 | -21.139 | 1.00 | 99.99 | H   |
| ATOM | 983 | HE3 | LYS A 57 | 18.916 | -18.677 | -22.740 | 1.00 | 99.99 | H   |
| ATOM | 984 | HZ1 | LYS A 57 | 18.849 | -21.087 | -23.207 | 1.00 | 99.99 | H   |
| ATOM | 985 | HZ2 | LYS A 57 | 18.068 | -21.331 | -21.718 | 1.00 | 99.99 | H   |
| ATOM | 986 | HZ3 | LYS A 57 | 17.313 | -20.417 | -22.931 | 1.00 | 99.99 | H   |
| ATOM | 987 | N   | LEU A 58 | 25.565 | -17.560 | -20.216 | 1.00 | 0.00  | N   |
| ATOM | 988 | CA  | LEU A 58 | 26.999 | -17.904 | -20.001 | 1.00 | 0.00  | C   |
| ATOM | 989 | C   | LEU A 58 | 27.775 | -17.700 | -21.303 | 1.00 | 0.00  | C   |

|      |      |      |          |        |         |         |      |       |   |
|------|------|------|----------|--------|---------|---------|------|-------|---|
| ATOM | 990  | O    | LEU A 58 | 27.259 | -17.172 | -22.268 | 1.00 | 0.00  | O |
| ATOM | 991  | CB   | LEU A 58 | 27.111 | -19.366 | -19.562 | 1.00 | 0.00  | C |
| ATOM | 992  | CG   | LEU A 58 | 28.079 | -19.471 | -18.382 | 1.00 | 0.00  | C |
| ATOM | 993  | CD1  | LEU A 58 | 27.478 | -18.764 | -17.165 | 1.00 | 0.00  | C |
| ATOM | 994  | CD2  | LEU A 58 | 28.319 | -20.944 | -18.048 | 1.00 | 0.00  | C |
| ATOM | 995  | H    | LEU A 58 | 25.091 | -17.008 | -19.560 | 1.00 | 99.99 | H |
| ATOM | 996  | HA   | LEU A 58 | 27.410 | -17.266 | -19.233 | 1.00 | 99.99 | H |
| ATOM | 997  | HB2  | LEU A 58 | 26.138 | -19.728 | -19.264 | 1.00 | 99.99 | H |
| ATOM | 998  | HB3  | LEU A 58 | 27.480 | -19.961 | -20.385 | 1.00 | 99.99 | H |
| ATOM | 999  | HG   | LEU A 58 | 29.017 | -19.003 | -18.643 | 1.00 | 99.99 | H |
| ATOM | 1000 | HD11 | LEU A 58 | 26.401 | -18.816 | -17.215 | 1.00 | 99.99 | H |
| ATOM | 1001 | HD12 | LEU A 58 | 27.821 | -19.247 | -16.263 | 1.00 | 99.99 | H |
| ATOM | 1002 | HD13 | LEU A 58 | 27.789 | -17.729 | -17.160 | 1.00 | 99.99 | H |
| ATOM | 1003 | HD21 | LEU A 58 | 27.617 | -21.556 | -18.594 | 1.00 | 99.99 | H |
| ATOM | 1004 | HD22 | LEU A 58 | 29.327 | -21.217 | -18.325 | 1.00 | 99.99 | H |
| ATOM | 1005 | HD23 | LEU A 58 | 28.183 | -21.099 | -16.988 | 1.00 | 99.99 | H |
| ATOM | 1006 | N    | ASN A 59 | 29.013 | -18.112 | -21.337 | 1.00 | 0.00  | N |
| ATOM | 1007 | CA   | ASN A 59 | 29.822 | -17.940 | -22.577 | 1.00 | 0.00  | C |
| ATOM | 1008 | C    | ASN A 59 | 31.276 | -18.320 | -22.294 | 1.00 | 0.00  | C |
| ATOM | 1009 | O    | ASN A 59 | 31.682 | -19.450 | -22.482 | 1.00 | 0.00  | O |
| ATOM | 1010 | CB   | ASN A 59 | 29.757 | -16.480 | -23.031 | 1.00 | 0.00  | C |
| ATOM | 1011 | CG   | ASN A 59 | 30.750 | -16.256 | -24.173 | 1.00 | 0.00  | C |

|      |      |      |     |   |    |        |         |         |      |       |     |
|------|------|------|-----|---|----|--------|---------|---------|------|-------|-----|
| ATOM | 1012 | ND2  | ASN | A | 59 | 30.866 | -15.066 | -24.697 | 1.00 | 0.00  | N   |
| ATOM | 1013 | OD1  | ASN | A | 59 | 31.428 | -17.173 | -24.593 | 1.00 | 0.00  | O   |
| ATOM | 1014 | H    | ASN | A | 59 | 29.411 | -18.534 | -20.548 | 1.00 | 99.99 | H   |
| ATOM | 1015 | HA   | ASN | A | 59 | 29.429 | -18.576 | -23.355 | 1.00 | 99.99 | H   |
| ATOM | 1016 | HB2  | ASN | A | 59 | 28.758 | -16.254 | -23.374 | 1.00 | 99.99 | H   |
| ATOM | 1017 | HB3  | ASN | A | 59 | 30.008 | -15.834 | -22.203 | 1.00 | 99.99 | H   |
| ATOM | 1018 | HD21 | ASN | A | 59 | 30.319 | -14.327 | -24.358 | 1.00 | 99.99 | H   |
| ATOM | 1019 | HD22 | ASN | A | 59 | 31.499 | -14.913 | -25.428 | 1.00 | 99.99 | H   |
| ATOM | 1020 | N    | THR | A | 60 | 32.065 | -17.383 | -21.844 | 1.00 | 0.00  | N   |
| ATOM | 1021 | CA   | THR | A | 60 | 33.493 | -17.688 | -21.550 | 1.00 | 0.00  | C   |
| ATOM | 1022 | C    | THR | A | 60 | 33.654 | -17.988 | -20.058 | 1.00 | 0.00  | C   |
| ATOM | 1023 | O    | THR | A | 60 | 33.181 | -17.196 | -19.260 | 1.00 | 0.00  | O   |
| ATOM | 1024 | CB   | THR | A | 60 | 34.358 | -16.482 | -21.924 | 1.00 | 0.00  | C   |
| ATOM | 1025 | CG2  | THR | A | 60 | 35.798 | -16.722 | -21.469 | 1.00 | 0.00  | C   |
| ATOM | 1026 | OG1  | THR | A | 60 | 34.327 | -16.299 | -23.332 | 1.00 | 0.00  | O   |
| ATOM | 1027 | OXT  | THR | A | 60 | 34.247 | -19.006 | -19.739 | 1.00 | 0.00  | O1- |
| ATOM | 1028 | H    | THR | A | 60 | 31.717 | -16.479 | -21.701 | 1.00 | 99.99 | H   |
| ATOM | 1029 | HA   | THR | A | 60 | 33.804 | -18.547 | -22.126 | 1.00 | 99.99 | H   |
| ATOM | 1030 | HB   | THR | A | 60 | 33.975 | -15.598 | -21.437 | 1.00 | 99.99 | H   |
| ATOM | 1031 | HG1  | THR | A | 60 | 34.830 | -17.010 | -23.735 | 1.00 | 99.99 | H   |
| ATOM | 1032 | HG21 | THR | A | 60 | 35.844 | -17.626 | -20.879 | 1.00 | 99.99 | H   |
| ATOM | 1033 | HG22 | THR | A | 60 | 36.436 | -16.826 | -22.335 | 1.00 | 99.99 | H   |

ATOM 1034 HG22 THR A 60 36.436 -16.826 -22.335 1.00 99.99 H

CONNECT 1 15 26 53 14

CONNECT 2 20 13 16

CONNECT 3 25 58 59

CONNECT 4 65 17 25

CONNECT 5 6 28 32

CONNECT 6 5 38 39 40

CONNECT 7 8 30 33

CONNECT 8 7 27 41 42

CONNECT 9 11 34 29

CONNECT 10 12 35 31

CONNECT 11 9 43 44 45

CONNECT 12 10 46 47 48

CONNECT 13 2 14 49 50

CONNECT 14 13 1 51 52

CONNECT 15 1 16 54 55

CONNECT 16 15 2 56 57

CONNECT 17 4 18 22

CONNECT 18 17 19 60

CONNECT 19 18 20 61

CONNECT 20 2 19 21

CONNECT 21 20 22 62

CONNECT 22 17 21 23

CONNECT 23 22 24 63

CONNECT 24 23 25 64

CONNECT 25 3 24 4

CONNECT 26 1 27 66 67

CONNECT 27 8 26 68 69

CONNECT 28 5 36

CONNECT 29 9 36

CONNECT 30 7 36

CONNECT 31 10 36

CONNECT 32 5 37

CONNECT 33 7 37

CONNECT 34 9 37

CONNECT 35 10 37

CONNECT 36 28 29 30 31

CONNECT 36 37

CONNECT 37 36 32 33 34

CONNECT 37 35

CONNECT 38 6

CONNECT 39 6

CONNECT 40 6

CONNECT 41 8

CONNECT 42 8  
CONNECT 43 11  
CONNECT 44 11  
CONNECT 45 11  
CONNECT 46 12  
CONNECT 47 12  
CONNECT 48 12  
CONNECT 49 13  
CONNECT 50 13  
CONNECT 51 14  
CONNECT 52 14  
CONNECT 53 1  
CONNECT 54 15  
CONNECT 55 15  
CONNECT 56 16  
CONNECT 57 16  
CONNECT 58 3  
CONNECT 59 3  
CONNECT 60 18  
CONNECT 61 19  
CONNECT 62 21  
CONNECT 63 23

CONNECT 64 24

CONNECT 65 4

CONNECT 66 26

CONNECT 67 26

CONNECT 68 27

CONNECT 69 27

END

**Data for computed docked structures:**

# Name: \*\*\*\*\*

# Creating user name zbl

# Creation time: Thu Jun 13 10:31:08 2019

# File generated by GOLD software.

#

@<TRIPOS>MOLECULE

\*\*\*\*\*|pRh-6|mol2|1|dock1

85 91 1

SMALL

USER\_CHARGES



@<TRIPOS>ATOM

|       |         |         |          |       |       |        |
|-------|---------|---------|----------|-------|-------|--------|
| 1 Cr  | 8.7443  | -0.0218 | -23.4774 | Cr.oh | 1 <1> | 0.0000 |
| 2 C   | 9.4949  | 1.8131  | -25.5609 | C.2   | 1 <1> | 0.0000 |
| 3 C   | 9.3443  | 2.9632  | -26.4925 | C.3   | 1 <1> | 0.0000 |
| 4 C   | 9.2046  | -1.9687 | -25.5349 | C.2   | 1 <1> | 0.0000 |
| 5 C   | 8.8230  | -3.0595 | -26.4782 | C.3   | 1 <1> | 0.0000 |
| 6 H   | 10.0273 | 3.5294  | -26.3730 | H     | 1 <1> | 0.0000 |
| 7 H   | 8.6162  | 3.2940  | -26.4916 | H     | 1 <1> | 0.0000 |
| 8 H   | 9.5657  | 2.7491  | -27.4110 | H     | 1 <1> | 0.0000 |
| 9 H   | 8.0970  | -3.7521 | -25.9759 | H     | 1 <1> | 0.0000 |
| 10 H  | 9.1722  | -4.0453 | -26.0718 | H     | 1 <1> | 0.0000 |
| 11 O  | 8.5167  | 1.4653  | -24.8403 | O.co2 | 1 <1> | 0.0000 |
| 12 O  | 9.1192  | -1.4862 | -22.1212 | O.co2 | 1 <1> | 0.0000 |
| 13 O  | 8.2949  | -1.4278 | -24.8412 | O.co2 | 1 <1> | 0.0000 |
| 14 O  | 9.3195  | 1.3797  | -22.1699 | O.co2 | 1 <1> | 0.0000 |
| 15 Cr | 10.9949 | -0.2351 | -24.1621 | Cr.oh | 1 <1> | 0.0000 |
| 16 O  | 10.6199 | 1.2293  | -25.5183 | O.co2 | 1 <1> | 0.0000 |
| 17 C  | 10.2443 | -2.0700 | -22.0786 | C.2   | 1 <1> | 0.0000 |
| 18 O  | 10.4197 | -1.6367 | -25.4696 | O.co2 | 1 <1> | 0.0000 |
| 19 C  | 10.5345 | 1.7118  | -22.1046 | C.2   | 1 <1> | 0.0000 |

|      |         |         |          |       |       |        |
|------|---------|---------|----------|-------|-------|--------|
| 20 O | 11.2225 | -1.7222 | -22.7992 | O.co2 | 1 <1> | 0.0000 |
| 21 O | 11.4443 | 1.1709  | -22.7983 | O.co2 | 1 <1> | 0.0000 |
| 22 C | 10.3949 | -3.2201 | -21.1470 | C.3   | 1 <1> | 0.0000 |
| 23 C | 10.9161 | 2.8026  | -21.1613 | C.3   | 1 <1> | 0.0000 |
| 24 H | 9.7119  | -3.7864 | -21.2665 | H     | 1 <1> | 0.0000 |
| 25 H | 11.1230 | -3.5509 | -21.1479 | H     | 1 <1> | 0.0000 |
| 26 H | 10.1735 | -3.0060 | -20.2285 | H     | 1 <1> | 0.0000 |
| 27 H | 11.5174 | 3.3381  | -21.5477 | H     | 1 <1> | 0.0000 |
| 28 H | 10.2309 | 3.1951  | -20.8012 | H     | 1 <1> | 0.0000 |
| 29 H | 11.4305 | 2.4308  | -20.6146 | H     | 1 <1> | 0.0000 |
| 30 C | 11.3670 | -3.0003 | -32.8549 | C.3   | 1 <1> | 0.0000 |
| 31 C | 10.4567 | -2.0963 | -32.0127 | C.3   | 1 <1> | 0.0000 |
| 32 N | 10.0007 | -2.7874 | -30.7319 | N.4   | 1 <1> | 0.0000 |
| 33 C | 11.0547 | -3.6143 | -29.9945 | C.3   | 1 <1> | 0.0000 |
| 34 C | 11.9126 | -4.4464 | -30.9585 | C.3   | 1 <1> | 0.0000 |
| 35 N | 12.4244 | -3.4182 | -31.8974 | N.pl3 | 1 <1> | 0.0000 |
| 36 N | 19.1014 | -0.2332 | -32.1335 | N.pl3 | 1 <1> | 0.0000 |
| 37 C | 16.0389 | -1.6000 | -31.4063 | C.ar  | 1 <1> | 0.0000 |
| 38 C | 15.2381 | -1.8863 | -30.3649 | C.ar  | 1 <1> | 0.0000 |
| 39 C | 14.0361 | -2.4619 | -30.5348 | C.ar  | 1 <1> | 0.0000 |
| 40 C | 13.5443 | -2.8071 | -31.7448 | C.ar  | 1 <1> | 0.0000 |
| 41 C | 14.3617 | -2.4829 | -32.7732 | C.ar  | 1 <1> | 0.0000 |

|      |                                |       |        |
|------|--------------------------------|-------|--------|
| 42 C | 15.5661 -1.8937 -32.6305 C.ar  | 1 <1> | 0.0000 |
| 43 C | 16.3302 -1.5977 -33.6982 C.ar  | 1 <1> | 0.0000 |
| 44 C | 17.5292 -1.0281 -33.5206 C.ar  | 1 <1> | 0.0000 |
| 45 C | 17.9593 -0.7697 -32.2740 C.ar  | 1 <1> | 0.0000 |
| 46 N | 17.2208 -1.0572 -31.2344 N.p13 | 1 <1> | 0.0000 |
| 47 C | 9.3153 -1.8900 -29.7192 C.3    | 1 <1> | 0.0000 |
| 48 C | 8.8410 -2.9945 -28.2886 C.3    | 1 <1> | 0.0000 |
| 49 H | 11.7243 -2.5170 -33.7868 H     | 1 <1> | 0.0000 |
| 50 H | 10.7929 -3.8827 -33.2204 H     | 1 <1> | 0.0000 |
| 51 H | 9.5647 -1.8018 -32.6133 H      | 1 <1> | 0.0000 |
| 52 H | 11.0701 -1.1966 -31.7883 H     | 1 <1> | 0.0000 |
| 53 H | 9.2780 -3.4812 -31.0406 H      | 1 <1> | 0.0000 |
| 54 H | 10.5415 -4.2968 -29.2761 H     | 1 <1> | 0.0000 |
| 55 H | 11.7346 -2.9424 -29.4200 H     | 1 <1> | 0.0000 |
| 56 H | 12.6738 -5.0619 -30.4407 H     | 1 <1> | 0.0000 |
| 57 H | 11.2783 -5.1915 -31.4922 H     | 1 <1> | 0.0000 |
| 58 H | 19.6988 0.0046 -32.9648 H      | 1 <1> | 0.0000 |
| 59 H | 19.4690 -0.0232 -31.1713 H     | 1 <1> | 0.0000 |
| 60 H | 15.5775 -1.6649 -29.3390 H     | 1 <1> | 0.0000 |
| 61 H | 13.4958 -2.6730 -29.5988 H     | 1 <1> | 0.0000 |
| 62 H | 14.0774 -2.7096 -33.8112 H     | 1 <1> | 0.0000 |
| 63 H | 15.9898 -1.8080 -34.7262 H     | 1 <1> | 0.0000 |

|         |         |         |             |       |        |
|---------|---------|---------|-------------|-------|--------|
| 64 H    | 18.1468 | -0.7766 | -34.4004 H  | 1 <1> | 0.0000 |
| 65 H    | 17.5706 | -0.8476 | -30.2895 H  | 1 <1> | 0.0000 |
| 66 H    | 8.3372  | -1.5075 | -30.0998 H  | 1 <1> | 0.0000 |
| 67 H    | 9.8196  | -1.0203 | -29.2284 H  | 1 <1> | 0.0000 |
| 68 H    | 7.9160  | -3.5430 | -28.5867 H  | 1 <1> | 0.0000 |
| 69 H    | 9.6504  | -3.7619 | -28.4202 H  | 1 <1> | 0.0000 |
| 70 **** | 8.6120  | 0.7004  | -24.2032 LP | 1 <1> | 0.0000 |
| 71 **** | 7.6473  | 1.9549  | -24.9073 LP | 1 <1> | 0.0000 |
| 72 **** | 8.9786  | -0.7164 | -22.7437 LP | 1 <1> | 0.0000 |
| 73 **** | 8.3727  | -1.7958 | -21.5322 LP | 1 <1> | 0.0000 |
| 74 **** | 8.5239  | -0.6960 | -24.1993 LP | 1 <1> | 0.0000 |
| 75 **** | 7.3469  | -1.7322 | -24.9348 LP | 1 <1> | 0.0000 |
| 76 **** | 9.0325  | 0.6535  | -22.7946 LP | 1 <1> | 0.0000 |
| 77 **** | 8.6431  | 1.8426  | -21.5970 LP | 1 <1> | 0.0000 |
| 78 **** | 10.7605 | 0.4594  | -24.8958 LP | 1 <1> | 0.0000 |
| 79 **** | 11.3665 | 1.5389  | -26.1073 LP | 1 <1> | 0.0000 |
| 80 **** | 10.7067 | -0.9105 | -24.8449 LP | 1 <1> | 0.0000 |
| 81 **** | 11.0961 | -2.0996 | -26.0425 LP | 1 <1> | 0.0000 |
| 82 **** | 11.1272 | -0.9574 | -23.4363 LP | 1 <1> | 0.0000 |
| 83 **** | 12.0919 | -2.2118 | -22.7322 LP | 1 <1> | 0.0000 |
| 84 **** | 11.2153 | 0.4390  | -23.4402 LP | 1 <1> | 0.0000 |
| 85 **** | 12.3922 | 1.4753  | -22.7047 LP | 1 <1> | 0.0000 |

@<TRIPOS>BOND

1 1 11 ar

2 1 12 ar

3 1 13 ar

4 1 14 ar

5 1 15 1

6 2 3 1

7 2 11 ar

8 2 16 ar

9 3 6 1

10 3 7 1

11 3 8 1

12 4 5 1

13 4 13 ar

14 4 18 ar

15 5 9 1

16 5 10 1

17 5 48 1

18 12 17 ar

19 14 19 ar

20 15 16 ar

21 15 18 ar

22 15 20 ar

23 15 21 ar

24 17 20 ar

25 17 22 1

26 19 21 ar

27 19 23 1

28 22 24 1

29 22 25 1

30 22 26 1

31 23 27 1

32 23 28 1

33 23 29 1

34 30 31 1

35 30 35 1

36 30 49 1

37 30 50 1

38 31 32 1

39 31 51 1

40 31 52 1

41 32 33 1

42 32 47 1

43 32 53 1

44 33 34 1  
45 33 54 1  
46 33 55 1  
47 34 35 1  
48 34 56 1  
49 34 57 1  
50 35 40 1  
51 36 45 1  
52 36 58 1  
53 36 59 1  
54 37 38 ar  
55 37 42 ar  
56 37 46 ar  
57 38 39 ar  
58 38 60 1  
59 39 40 ar  
60 39 61 1  
61 40 41 ar  
62 41 42 ar  
63 41 62 1  
64 42 43 ar  
65 43 44 ar

66 43 63 1  
67 44 45 ar  
68 44 64 1  
69 45 46 ar  
70 46 65 1  
71 47 48 1  
72 47 66 1  
73 47 67 1  
74 48 68 1  
75 48 69 1  
76 11 70 1  
77 11 71 1  
78 12 72 1  
79 12 73 1  
80 13 74 1  
81 13 75 1  
82 14 76 1  
83 14 77 1  
84 16 78 1  
85 16 79 1  
86 18 80 1  
87 18 81 1



88 20 82 1

89 20 83 1

90 21 84 1

91 21 85 1

@<TRIPOS>SUBSTRUCTURE

1 \*\*\*\* 1

@<TRIPOS>SET

LONE\_PAIRS STATIC ATOMS <user> \*\*\*\* ""

16 70 71 72 73 74 75 76 77 78 79 80 81 82 83 84 85

DONOR\_HYDROGENS STATIC ATOMS <user> \*\*\*\* ""

4 53 58 59 65

ATOM\$BLUE STATIC ATOMS COLORGROUP SYSTEM

16 70 71 72 73 74 75 76 77 78 79 80 81 82 83 84 85

ATOM\$RED STATIC ATOMS COLORGROUP SYSTEM

4 53 58 59 65

@<TRIPOS>COMMENT

> <Gold.Version>

5.7.2

> <Gold.Id.Protein>

unknown|gold\_protein|mol2

><Gold.Protein.RotatedTorsions>

[ 614 603 602 601 ] final -113.50 input 2.31 | X-H torsion

[ 841 836 835 832 ] final 78.73 input 27.02 | X-H torsion

[ 172 163 162 160 ] final -21.43 input 178.05 | X-H torsion

[ 876 867 866 864 ] final -86.52 input 173.38 | X-H torsion

><Gold.Protein.ActiveResidues>

TYR19 ILE22 HIS23 ASP25 ASP26 HIS41 GLY42 GLU43 TRP44 LYS46  
PHE57 PRO59 SER60 ASN61 TYR62

><Gold.Protein.RotatedAtoms>

20.6822 -0.5482 -29.3807 H 0 0 0 0 0 0 0 0 0 0 0 0 # atno 172 bound\_to 163  
14.2583 -0.2864 -22.9358 H 0 0 0 0 0 0 0 0 0 0 0 0 # atno 614 bound\_to 603  
12.8958 -1.2201 -22.5412 H 0 0 0 0 0 0 0 0 0 0 0 0 # atno 615 bound\_to 603  
12.8731 0.4618 -22.3055 H 0 0 0 0 0 0 0 0 0 0 0 0 # atno 616 bound\_to 603  
17.1972 -13.8310 -27.5030 H 0 0 0 0 0 0 0 0 0 0 0 0 # atno 841 bound\_to 836  
24.9208 -6.8326 -34.6930 H 0 0 0 0 0 0 0 0 0 0 0 0 # atno 876 bound\_to 867  
18.0808 -14.1223 -28.8096 LP 0 0 0 0 0 0 0 0 0 0 0 0 # atno 987 bound\_to 836  
16.4643 -14.3528 -28.8309 LP 0 0 0 0 0 0 0 0 0 0 0 0 # atno 988 bound\_to 836  
20.5685 -1.8628 -30.2937 LP 0 0 0 0 0 0 0 0 0 0 0 0 # atno 998 bound\_to 163  
21.5201 -0.6158 -30.7475 LP 0 0 0 0 0 0 0 0 0 0 0 0 # atno 999 bound\_to 163  
24.8438 -5.3519 -34.0800 LP 0 0 0 0 0 0 0 0 0 0 0 0 # atno 1000 bound\_to 867

23.4861 -6.1291 -34.5482 LP 0 0 0 0 0 0 0 0 0 0 0 0 0 # atno 1001 bound\_to 867

><Gold.Score>

| Score | S(PLP) | S(hbond) | S(cho) | S(metal) | DE(clash) | DE(tors) | intcor |
|-------|--------|----------|--------|----------|-----------|----------|--------|
| 78.99 | -60.05 | 7.23     | 0.00   | 0.00     | 0.00      | 1.49     | 0.22   |

><Gold.PLP.Fitness>

78.9906

><Gold.PLP.PLP>

-60.0518

><Gold.PLP.part.hbond>

-4.9100

><Gold.PLP.part.metal>

0.0000

><Gold.PLP.part.buried>

-6.5257

><Gold.PLP.part.nonpolar>

-50.5650

> <Gold.PLP.part.repulsive>

0.4409

> <Gold.PLP.ligand.clash>

0.0000

> <Gold.PLP.ligand.torsion>

1.4869

> <Gold.PLP.Chemscore.Hbond>

7.2320

> <Gold.PLP.Chemscore.CHOScore>

0.0000

> <Gold.PLP.Chemscore.Metal>

0.0000

> <Gold.Chemscore.Hbonds>

donor molecule, donor type, donor heavy atom, donor atom, acceptor molecule, acceptor atom, score

L1 H 36 59 P1 261 1.76

L1 H 46 65 P1 261 1.89

P1 H 603 615 L1 20 1.66

P1 H 603 616 L1 21 1.92

><Gold.PLP.Chemscore.Internal.Correction>

0.2167

# Name: \*\*\*\*\*

# Creating user name zbl

# Creation time: Thu Jun 13 10:31:09 2019

# File generated by GOLD software.

#

@<TRIPOS>MOLECULE

\*\*\*\*\*|pRh-6|mol2|1|dock2

85 91 1

SMALL

USER\_CHARGES

@<TRIPOS>ATOM

|       |         |         |          |       |       |        |
|-------|---------|---------|----------|-------|-------|--------|
| 1 Cr  | 13.0456 | -7.8803 | -33.9882 | Cr.oh | 1 <1> | 0.0000 |
| 2 C   | 15.4365 | -7.4003 | -35.5127 | C.2   | 1 <1> | 0.0000 |
| 3 C   | 16.8883 | -7.4479 | -35.8341 | C.3   | 1 <1> | 0.0000 |
| 4 C   | 12.8458 | -5.0195 | -34.0961 | C.2   | 1 <1> | 0.0000 |
| 5 C   | 12.7980 | -3.6420 | -33.5256 | C.3   | 1 <1> | 0.0000 |
| 6 H   | 16.9994 | -7.8317 | -36.6352 | H     | 1 <1> | 0.0000 |
| 7 H   | 17.3461 | -7.7366 | -35.2454 | H     | 1 <1> | 0.0000 |
| 8 H   | 17.2556 | -6.5901 | -36.0946 | H     | 1 <1> | 0.0000 |
| 9 H   | 12.1606 | -2.9884 | -34.1779 | H     | 1 <1> | 0.0000 |
| 10 H  | 13.2754 | -2.9229 | -34.2425 | H     | 1 <1> | 0.0000 |
| 11 O  | 15.0341 | -7.8251 | -34.3926 | O.co2 | 1 <1> | 0.0000 |
| 12 O  | 11.0317 | -7.9297 | -33.7307 | O.co2 | 1 <1> | 0.0000 |
| 13 O  | 13.0653 | -5.9880 | -33.3117 | O.co2 | 1 <1> | 0.0000 |
| 14 O  | 13.0197 | -9.7139 | -34.7893 | O.co2 | 1 <1> | 0.0000 |
| 15 Cr | 12.6359 | -6.9902 | -36.1375 | Cr.oh | 1 <1> | 0.0000 |
| 16 O  | 14.6498 | -6.9408 | -36.3949 | O.co2 | 1 <1> | 0.0000 |
| 17 C  | 10.2450 | -7.4702 | -34.6129 | C.2   | 1 <1> | 0.0000 |
| 18 O  | 12.6618 | -5.1565 | -35.3364 | O.co2 | 1 <1> | 0.0000 |
| 19 C  | 12.8357 | -9.8510 | -36.0296 | C.2   | 1 <1> | 0.0000 |
| 20 O  | 10.6474 | -7.0454 | -35.7331 | O.co2 | 1 <1> | 0.0000 |
| 21 O  | 12.6162 | -8.8824 | -36.8140 | O.co2 | 1 <1> | 0.0000 |

|      |                               |       |        |
|------|-------------------------------|-------|--------|
| 22 C | 8.7932 -7.4226 -34.2916 C.3   | 1 <1> | 0.0000 |
| 23 C | 12.8835 -11.2285 -36.6000 C.3 | 1 <1> | 0.0000 |
| 24 H | 8.6821 -7.0387 -33.4905 H     | 1 <1> | 0.0000 |
| 25 H | 8.3354 -7.1338 -34.8802 H     | 1 <1> | 0.0000 |
| 26 H | 8.4259 -8.2803 -34.0311 H     | 1 <1> | 0.0000 |
| 27 H | 13.3214 -11.2171 -37.3783 H   | 1 <1> | 0.0000 |
| 28 H | 13.1422 -11.8252 -36.0252 H   | 1 <1> | 0.0000 |
| 29 H | 12.1132 -11.3512 -36.9053 H   | 1 <1> | 0.0000 |
| 30 C | 11.8232 0.2478 -29.3426 C.3   | 1 <1> | 0.0000 |
| 31 C | 12.2598 -1.0344 -30.0642 C.3  | 1 <1> | 0.0000 |
| 32 N | 13.7785 -1.1511 -30.1422 N.4  | 1 <1> | 0.0000 |
| 33 C | 14.5558 -0.7443 -28.8898 C.3  | 1 <1> | 0.0000 |
| 34 C | 13.9950 0.5357 -28.2536 C.3   | 1 <1> | 0.0000 |
| 35 N | 12.5653 0.1928 -28.0558 N.pl3 | 1 <1> | 0.0000 |
| 36 N | 8.8775 -2.9128 -22.4401 N.pl3 | 1 <1> | 0.0000 |
| 37 C | 11.0001 -1.3015 -24.6021 C.ar | 1 <1> | 0.0000 |
| 38 C | 12.1285 -0.5708 -24.6152 C.ar | 1 <1> | 0.0000 |
| 39 C | 12.6545 -0.1029 -25.7595 C.ar | 1 <1> | 0.0000 |
| 40 C | 12.0964 -0.3129 -26.9718 C.ar | 1 <1> | 0.0000 |
| 41 C | 10.9774 -1.0724 -26.9276 C.ar | 1 <1> | 0.0000 |
| 42 C | 10.4368 -1.5645 -25.7946 C.ar | 1 <1> | 0.0000 |
| 43 C | 9.3198 -2.3147 -25.8218 C.ar  | 1 <1> | 0.0000 |

|      |                                |       |        |
|------|--------------------------------|-------|--------|
| 44 C | 8.7988 -2.7738 -24.6766 C.ar   | 1 <1> | 0.0000 |
| 45 C | 9.3941 -2.4684 -23.5112 C.ar   | 1 <1> | 0.0000 |
| 46 N | 10.4784 -1.7388 -23.4806 N.pl3 | 1 <1> | 0.0000 |
| 47 C | 14.3028 -2.4976 -30.6032 C.3   | 1 <1> | 0.0000 |
| 48 C | 13.0268 -3.1688 -31.7919 C.3   | 1 <1> | 0.0000 |
| 49 H | 10.7223 0.3515 -29.2601 H      | 1 <1> | 0.0000 |
| 50 H | 12.1270 1.1403 -29.9368 H      | 1 <1> | 0.0000 |
| 51 H | 11.8333 -1.0463 -31.0943 H     | 1 <1> | 0.0000 |
| 52 H | 11.8222 -1.8648 -29.4686 H     | 1 <1> | 0.0000 |
| 53 H | 14.0663 -0.4608 -30.8769 H     | 1 <1> | 0.0000 |
| 54 H | 15.6248 -0.5805 -29.1648 H     | 1 <1> | 0.0000 |
| 55 H | 14.5070 -1.5577 -28.1284 H     | 1 <1> | 0.0000 |
| 56 H | 14.5539 0.8528 -27.3517 H      | 1 <1> | 0.0000 |
| 57 H | 14.1043 1.3940 -28.9564 H      | 1 <1> | 0.0000 |
| 58 H | 8.0084 -3.5036 -22.4573 H      | 1 <1> | 0.0000 |
| 59 H | 9.3160 -2.6873 -21.5116 H      | 1 <1> | 0.0000 |
| 60 H | 12.6315 -0.3271 -23.6641 H     | 1 <1> | 0.0000 |
| 61 H | 13.5608 0.5086 -25.6276 H      | 1 <1> | 0.0000 |
| 62 H | 10.4272 -1.3178 -27.8477 H     | 1 <1> | 0.0000 |
| 63 H | 8.8198 -2.5693 -26.7717 H      | 1 <1> | 0.0000 |
| 64 H | 7.8891 -3.3985 -24.7056 H      | 1 <1> | 0.0000 |
| 65 H | 10.9177 -1.5201 -22.5760 H     | 1 <1> | 0.0000 |



|         |         |          |             |       |        |
|---------|---------|----------|-------------|-------|--------|
| 66 H    | 14.3153 | -3.2439  | -29.7720 H  | 1 <1> | 0.0000 |
| 67 H    | 15.2701 | -2.6257  | -31.1506 H  | 1 <1> | 0.0000 |
| 68 H    | 12.4034 | -3.9029  | -31.2281 H  | 1 <1> | 0.0000 |
| 69 H    | 12.3736 | -2.2563  | -31.8376 H  | 1 <1> | 0.0000 |
| 70 **** | 14.0589 | -7.8073  | -34.1721 LP | 1 <1> | 0.0000 |
| 71 **** | 15.6909 | -8.1790  | -33.7267 LP | 1 <1> | 0.0000 |
| 72 **** | 12.0151 | -7.9665  | -33.9081 LP | 1 <1> | 0.0000 |
| 73 **** | 10.6686 | -8.2552  | -32.8577 LP | 1 <1> | 0.0000 |
| 74 **** | 13.1000 | -6.9218  | -33.6678 LP | 1 <1> | 0.0000 |
| 75 **** | 13.2041 | -5.8195  | -32.3358 LP | 1 <1> | 0.0000 |
| 76 **** | 12.9960 | -8.8027  | -34.3780 LP | 1 <1> | 0.0000 |
| 77 **** | 13.1892 | -10.5164 | -34.2173 LP | 1 <1> | 0.0000 |
| 78 **** | 13.6663 | -6.9039  | -36.2176 LP | 1 <1> | 0.0000 |
| 79 **** | 15.0129 | -6.6153  | -37.2680 LP | 1 <1> | 0.0000 |
| 80 **** | 12.6855 | -6.0677  | -35.7477 LP | 1 <1> | 0.0000 |
| 81 **** | 12.4923 | -4.3540  | -35.9084 LP | 1 <1> | 0.0000 |
| 82 **** | 11.6226 | -7.0632  | -35.9536 LP | 1 <1> | 0.0000 |
| 83 **** | 9.9906  | -6.6914  | -36.3989 LP | 1 <1> | 0.0000 |
| 84 **** | 12.5815 | -7.9486  | -36.4579 LP | 1 <1> | 0.0000 |
| 85 **** | 12.4774 | -9.0509  | -37.7898 LP | 1 <1> | 0.0000 |

@<TRIPOS>BOND

1 1 11 ar

2 1 12 ar

3 1 13 ar

4 1 14 ar

5 1 15 1

6 2 3 1

7 2 11 ar

8 2 16 ar

9 3 6 1

10 3 7 1

11 3 8 1

12 4 5 1

13 4 13 ar

14 4 18 ar

15 5 9 1

16 5 10 1

17 5 48 1

18 12 17 ar

19 14 19 ar

20 15 16 ar

21 15 18 ar

22 15 20 ar

23 15 21 ar

24 17 20 ar

25 17 22 1

26 19 21 ar

27 19 23 1

28 22 24 1

29 22 25 1

30 22 26 1

31 23 27 1

32 23 28 1

33 23 29 1

34 30 31 1

35 30 35 1

36 30 49 1

37 30 50 1

38 31 32 1

39 31 51 1

40 31 52 1

41 32 33 1

42 32 47 1

43 32 53 1

44 33 34 1

45 33 54 1

46 33 55 1  
47 34 35 1  
48 34 56 1  
49 34 57 1  
50 35 40 1  
51 36 45 1  
52 36 58 1  
53 36 59 1  
54 37 38 ar  
55 37 42 ar  
56 37 46 ar  
57 38 39 ar  
58 38 60 1  
59 39 40 ar  
60 39 61 1  
61 40 41 ar  
62 41 42 ar  
63 41 62 1  
64 42 43 ar  
65 43 44 ar  
66 43 63 1  
67 44 45 ar

68 44 64 1  
69 45 46 ar  
70 46 65 1  
71 47 48 1  
72 47 66 1  
73 47 67 1  
74 48 68 1  
75 48 69 1  
76 11 70 1  
77 11 71 1  
78 12 72 1  
79 12 73 1  
80 13 74 1  
81 13 75 1  
82 14 76 1  
83 14 77 1  
84 16 78 1  
85 16 79 1  
86 18 80 1  
87 18 81 1  
88 20 82 1  
89 20 83 1

90 21 84 1

91 21 85 1

@<TRIPOS>SUBSTRUCTURE

1 \*\*\*\* 1

@<TRIPOS>SET

LONE\_PAIRS STATIC ATOMS <user> \*\*\*\* ""

16 70 71 72 73 74 75 76 77 78 79 80 81 82 83 84 85

DONOR\_HYDROGENS STATIC ATOMS <user> \*\*\*\* ""

4 53 58 59 65

ATOM\$BLUE STATIC ATOMS COLORGROUP SYSTEM

16 70 71 72 73 74 75 76 77 78 79 80 81 82 83 84 85

ATOM\$RED STATIC ATOMS COLORGROUP SYSTEM

4 53 58 59 65

@<TRIPOS>COMMENT

><Gold.Version>

5.7.2

><Gold.Id.Protein>

unknown|gold\_protein|mol2

><Gold.Protein.RotatedTorsions>

[ 614 603 602 601 ] final 133.44 input 2.31 | X-H torsion

S110

[ 841 836 835 832 ] final -73.76 input 27.02 | X-H torsion

[ 172 163 162 160 ] final 87.56 input 178.05 | X-H torsion

[ 876 867 866 864 ] final 131.20 input 173.38 | X-H torsion

><Gold.Protein.ActiveResidues>

TYR19 ILE22 HIS23 ASP25 ASP26 HIS41 GLY42 GLU43 TRP44 LYS46

PHE57 PRO59 SER60 ASN61 TYR62

><Gold.Protein.RotatedAtoms>

21.5318 -0.5093 -30.6012 H 0 0 0 0 0 0 0 0 0 0 0 0 # atno 172 bound\_to 163

12.9697 0.5201 -22.3335 H 0 0 0 0 0 0 0 0 0 0 0 0 # atno 614 bound\_to 603

14.2537 -0.4044 -22.9502 H 0 0 0 0 0 0 0 0 0 0 0 0 # atno 615 bound\_to 603

12.8010 -1.1593 -22.4976 H 0 0 0 0 0 0 0 0 0 0 0 0 # atno 616 bound\_to 603

17.7016 -14.2285 -29.1559 H 0 0 0 0 0 0 0 0 0 0 0 0 # atno 841 bound\_to 836

24.4856 -5.2933 -34.0373 H 0 0 0 0 0 0 0 0 0 0 0 0 # atno 876 bound\_to 867

16.3166 -14.2364 -28.3469 LP 0 0 0 0 0 0 0 0 0 0 0 0 # atno 987 bound\_to 836

17.7122 -13.8318 -27.6018 LP 0 0 0 0 0 0 0 0 0 0 0 0 # atno 988 bound\_to 836

20.5441 -0.6604 -29.3455 LP 0 0 0 0 0 0 0 0 0 0 0 0 # atno 998 bound\_to 163

20.6758 -1.8579 -30.4479 LP 0 0 0 0 0 0 0 0 0 0 0 0 # atno 999 bound\_to 163

23.5758 -6.4462 -34.6833 LP 0 0 0 0 0 0 0 0 0 0 0 0 # atno 1000 bound\_to 867

25.1992 -6.6088 -34.6154 LP 0 0 0 0 0 0 0 0 0 0 0 0 # atno 1001 bound\_to 867

> <Gold.Score>

| Score | S(PLP) | S(hbond) | S(cho) | S(metal) | DE(clash) | DE(tors) | intcor |
|-------|--------|----------|--------|----------|-----------|----------|--------|
| 54.92 | -53.89 | 1.00     | 0.00   | 0.00     | 0.00      | 1.07     | 0.17   |

> <Gold.PLP.Fitness>

54.9235

> <Gold.PLP.PLP>

-53.8877

> <Gold.PLP.part.hbond>

-3.0000

> <Gold.PLP.part.metal>

0.0000

> <Gold.PLP.part.buried>

0.7209

> <Gold.PLP.part.nonpolar>

-52.7134



> <Gold.PLP.part.repulsive>

0.2165

> <Gold.PLP.ligand.clash>

0.0000

> <Gold.PLP.ligand.torsion>

1.0692

> <Gold.PLP.Chemscore.Hbond>

1.0000

> <Gold.PLP.Chemscore.CHOScore>

0.0000

> <Gold.PLP.Chemscore.Metal>

0.0000

> <Gold.Chemscore.Hbonds>

donor molecule, donor type, donor heavy atom, donor atom, acceptor molecule, acceptor atom, score

P1 H 557 566 L1 11 1.00

><Gold.PLP.Chemscore.Internal.Correction>

0.1743

# Name: \*\*\*\*\*

# Creating user name zb1

# Creation time: Thu Jun 13 10:31:10 2019

# File generated by GOLD software.

#

@<TRIPOS>MOLECULE

\*\*\*\*\*|pRh-6|mol2|1|dock3

85 91 1

SMALL

USER\_CHARGES

@<TRIPOS>ATOM

|      |         |        |          |       |       |        |
|------|---------|--------|----------|-------|-------|--------|
| 1 Cr | 11.2132 | 3.8450 | -30.0532 | Cr.oh | 1 <1> | 0.0000 |
| 2 C  | 8.3729  | 3.7788 | -30.5000 | C.2   | 1 <1> | 0.0000 |
| 3 C  | 6.9565  | 3.3963 | -30.2536 | C.3   | 1 <1> | 0.0000 |
| 4 C  | 11.2869 | 2.8601 | -32.7477 | C.2   | 1 <1> | 0.0000 |

S114

|       |         |        |          |       |       |        |
|-------|---------|--------|----------|-------|-------|--------|
| 5 C   | 11.5924 | 1.8698 | -33.8206 | C.3   | 1 <1> | 0.0000 |
| 6 H   | 6.4650  | 4.1379 | -30.1544 | H     | 1 <1> | 0.0000 |
| 7 H   | 6.8600  | 2.8389 | -29.6884 | H     | 1 <1> | 0.0000 |
| 8 H   | 6.4946  | 3.0888 | -31.0477 | H     | 1 <1> | 0.0000 |
| 9 H   | 11.8562 | 2.4120 | -34.7668 | H     | 1 <1> | 0.0000 |
| 10 H  | 10.8376 | 1.9661 | -34.6452 | H     | 1 <1> | 0.0000 |
| 11 O  | 9.2892  | 3.2439 | -29.8134 | O.co2 | 1 <1> | 0.0000 |
| 12 O  | 13.0854 | 4.5720 | -30.3544 | O.co2 | 1 <1> | 0.0000 |
| 13 O  | 11.5053 | 2.5310 | -31.5454 | O.co2 | 1 <1> | 0.0000 |
| 14 O  | 10.8630 | 5.2370 | -28.6588 | O.co2 | 1 <1> | 0.0000 |
| 15 Cr | 10.4765 | 5.3758 | -31.6944 | Cr.oh | 1 <1> | 0.0000 |
| 16 O  | 8.6042  | 4.6489 | -31.3933 | O.co2 | 1 <1> | 0.0000 |
| 17 C  | 13.3167 | 5.4421 | -31.2476 | C.2   | 1 <1> | 0.0000 |
| 18 O  | 10.8266 | 3.9838 | -33.0888 | O.co2 | 1 <1> | 0.0000 |
| 19 C  | 10.4028 | 6.3608 | -28.9999 | C.2   | 1 <1> | 0.0000 |
| 20 O  | 12.4004 | 5.9770 | -31.9342 | O.co2 | 1 <1> | 0.0000 |
| 21 O  | 10.1843 | 6.6899 | -30.2022 | O.co2 | 1 <1> | 0.0000 |
| 22 C  | 14.7331 | 5.8246 | -31.4940 | C.3   | 1 <1> | 0.0000 |
| 23 C  | 10.0973 | 7.3511 | -27.9271 | C.3   | 1 <1> | 0.0000 |
| 24 H  | 15.2247 | 5.0830 | -31.5932 | H     | 1 <1> | 0.0000 |
| 25 H  | 14.8296 | 6.3820 | -32.0593 | H     | 1 <1> | 0.0000 |
| 26 H  | 15.1950 | 6.1320 | -30.6999 | H     | 1 <1> | 0.0000 |

|      |         |         |                |       |        |
|------|---------|---------|----------------|-------|--------|
| 27 H | 9.3282  | 7.7664  | -28.1106 H     | 1 <1> | 0.0000 |
| 28 H | 10.1710 | 7.0198  | -27.1282 H     | 1 <1> | 0.0000 |
| 29 H | 10.6127 | 7.9919  | -28.0863 H     | 1 <1> | 0.0000 |
| 30 C | 15.4264 | -2.1695 | -31.7880 C.3   | 1 <1> | 0.0000 |
| 31 C | 14.8110 | -1.3730 | -32.9465 C.3   | 1 <1> | 0.0000 |
| 32 N | 13.6440 | -2.1165 | -33.5878 N.4   | 1 <1> | 0.0000 |
| 33 C | 12.6866 | -2.8302 | -32.6326 C.3   | 1 <1> | 0.0000 |
| 34 C | 13.4333 | -3.5601 | -31.5068 C.3   | 1 <1> | 0.0000 |
| 35 N | 14.2602 | -2.4776 | -30.9194 N.pl3 | 1 <1> | 0.0000 |
| 36 N | 10.9964 | 1.4093  | -25.5322 N.pl3 | 1 <1> | 0.0000 |
| 37 C | 13.0278 | -0.0789 | -27.8635 C.ar  | 1 <1> | 0.0000 |
| 38 C | 14.2863 | -0.0420 | -28.3350 C.ar  | 1 <1> | 0.0000 |
| 39 C | 14.6944 | -0.8535 | -29.3248 C.ar  | 1 <1> | 0.0000 |
| 40 C | 13.8849 | -1.7512 | -29.9283 C.ar  | 1 <1> | 0.0000 |
| 41 C | 12.6335 | -1.7818 | -29.4144 C.ar  | 1 <1> | 0.0000 |
| 42 C | 12.2030 | -0.9877 | -28.4134 C.ar  | 1 <1> | 0.0000 |
| 43 C | 10.9427 | -1.0701 | -27.9487 C.ar  | 1 <1> | 0.0000 |
| 44 C | 10.5418 | -0.2547 | -26.9648 C.ar  | 1 <1> | 0.0000 |
| 45 C | 11.4031 | 0.6456  | -26.4613 C.ar  | 1 <1> | 0.0000 |
| 46 N | 12.6276 | 0.7298  | -26.9112 N.pl3 | 1 <1> | 0.0000 |
| 47 C | 12.8143 | -1.3035 | -34.5632 C.3   | 1 <1> | 0.0000 |
| 48 C | 12.1901 | 0.1734  | -33.6036 C.3   | 1 <1> | 0.0000 |

|         |         |         |             |       |        |
|---------|---------|---------|-------------|-------|--------|
| 49 H    | 16.2699 | -1.6454 | -31.2946 H  | 1 <1> | 0.0000 |
| 50 H    | 15.8900 | -3.1061 | -32.1750 H  | 1 <1> | 0.0000 |
| 51 H    | 15.5914 | -1.1721 | -33.7170 H  | 1 <1> | 0.0000 |
| 52 H    | 14.4774 | -0.4143 | -32.4933 H  | 1 <1> | 0.0000 |
| 53 H    | 14.0866 | -2.8818 | -34.1512 H  | 1 <1> | 0.0000 |
| 54 H    | 12.0814 | -3.5679 | -33.2112 H  | 1 <1> | 0.0000 |
| 55 H    | 11.9929 | -2.0929 | -32.1648 H  | 1 <1> | 0.0000 |
| 56 H    | 12.7560 | -4.0937 | -30.8119 H  | 1 <1> | 0.0000 |
| 57 H    | 14.0763 | -4.3656 | -31.9312 H  | 1 <1> | 0.0000 |
| 58 H    | 10.0147 | 1.3444  | -25.1627 H  | 1 <1> | 0.0000 |
| 59 H    | 11.6440 | 2.1279  | -25.1207 H  | 1 <1> | 0.0000 |
| 60 H    | 15.0039 | 0.6845  | -27.9178 H  | 1 <1> | 0.0000 |
| 61 H    | 15.7382 | -0.6986 | -29.6398 H  | 1 <1> | 0.0000 |
| 62 H    | 11.8764 | -2.4705 | -29.8172 H  | 1 <1> | 0.0000 |
| 63 H    | 10.2252 | -1.8025 | -28.3560 H  | 1 <1> | 0.0000 |
| 64 H    | 9.5105  | -0.3346 | -26.5793 H  | 1 <1> | 0.0000 |
| 65 H    | 13.2698 | 1.4257  | -26.5080 H  | 1 <1> | 0.0000 |
| 66 H    | 11.8830 | -1.8422 | -34.8641 H  | 1 <1> | 0.0000 |
| 67 H    | 13.2310 | -0.8558 | -35.4999 H  | 1 <1> | 0.0000 |
| 68 H    | 11.5861 | -0.2177 | -32.7505 H  | 1 <1> | 0.0000 |
| 69 H    | 13.1637 | 0.4583  | -33.1219 H  | 1 <1> | 0.0000 |
| 70 **** | 10.2432 | 3.5029  | -29.9644 LP | 1 <1> | 0.0000 |

|    |      |         |        |             |       |        |
|----|------|---------|--------|-------------|-------|--------|
| 71 | **** | 9.0602  | 2.5616 | -29.1191 LP | 1 <1> | 0.0000 |
| 72 | **** | 12.1462 | 4.2828 | -30.1694 LP | 1 <1> | 0.0000 |
| 73 | **** | 13.8423 | 4.1752 | -29.8350 LP | 1 <1> | 0.0000 |
| 74 | **** | 11.3116 | 3.1770 | -30.8071 LP | 1 <1> | 0.0000 |
| 75 | **** | 11.8716 | 1.6249 | -31.3337 LP | 1 <1> | 0.0000 |
| 76 | **** | 11.0753 | 4.5514 | -29.3551 LP | 1 <1> | 0.0000 |
| 77 | **** | 11.0157 | 5.0318 | -27.6921 LP | 1 <1> | 0.0000 |
| 78 | **** | 9.5434  | 4.9381 | -31.5783 LP | 1 <1> | 0.0000 |
| 79 | **** | 7.8473  | 5.0457 | -31.9126 LP | 1 <1> | 0.0000 |
| 80 | **** | 10.6144 | 4.6695 | -32.3926 LP | 1 <1> | 0.0000 |
| 81 | **** | 10.6739 | 4.1891 | -34.0556 LP | 1 <1> | 0.0000 |
| 82 | **** | 11.4465 | 5.7180 | -31.7832 LP | 1 <1> | 0.0000 |
| 83 | **** | 12.6294 | 6.6593 | -32.6285 LP | 1 <1> | 0.0000 |
| 84 | **** | 10.3781 | 6.0439 | -30.9406 LP | 1 <1> | 0.0000 |
| 85 | **** | 9.8180  | 7.5960 | -30.4139 LP | 1 <1> | 0.0000 |

@<TRIPOS>BOND

- 1 1 11 ar
- 2 1 12 ar
- 3 1 13 ar
- 4 1 14 ar
- 5 1 15 1
- 6 2 3 1

7 2 11 ar

8 2 16 ar

9 3 6 1

10 3 7 1

11 3 8 1

12 4 5 1

13 4 13 ar

14 4 18 ar

15 5 9 1

16 5 10 1

17 5 48 1

18 12 17 ar

19 14 19 ar

20 15 16 ar

21 15 18 ar

22 15 20 ar

23 15 21 ar

24 17 20 ar

25 17 22 1

26 19 21 ar

27 19 23 1

28 22 24 1

29 22 25 1

30 22 26 1

31 23 27 1

32 23 28 1

33 23 29 1

34 30 31 1

35 30 35 1

36 30 49 1

37 30 50 1

38 31 32 1

39 31 51 1

40 31 52 1

41 32 33 1

42 32 47 1

43 32 53 1

44 33 34 1

45 33 54 1

46 33 55 1

47 34 35 1

48 34 56 1

49 34 57 1

50 35 40 1



51 36 45 1  
52 36 58 1  
53 36 59 1  
54 37 38 ar  
55 37 42 ar  
56 37 46 ar  
57 38 39 ar  
58 38 60 1  
59 39 40 ar  
60 39 61 1  
61 40 41 ar  
62 41 42 ar  
63 41 62 1  
64 42 43 ar  
65 43 44 ar  
66 43 63 1  
67 44 45 ar  
68 44 64 1  
69 45 46 ar  
70 46 65 1  
71 47 48 1  
72 47 66 1

73 47 67 1

74 48 68 1

75 48 69 1

76 11 70 1

77 11 71 1

78 12 72 1

79 12 73 1

80 13 74 1

81 13 75 1

82 14 76 1

83 14 77 1

84 16 78 1

85 16 79 1

86 18 80 1

87 18 81 1

88 20 82 1

89 20 83 1

90 21 84 1

91 21 85 1

@<TRIPOS>SUBSTRUCTURE

1 \*\*\*\* 1

@<TRIPOS>SET

LONE\_PAIRS STATIC ATOMS <user> \*\*\*\* ""

16 70 71 72 73 74 75 76 77 78 79 80 81 82 83 84 85

DONOR\_HYDROGENS STATIC ATOMS <user> \*\*\*\* ""

4 53 58 59 65

ATOM\$BLUE STATIC ATOMS COLORGROUP SYSTEM

16 70 71 72 73 74 75 76 77 78 79 80 81 82 83 84 85

ATOM\$RED STATIC ATOMS COLORGROUP SYSTEM

4 53 58 59 65

@<TRIPOS>COMMENT

> <Gold.Version>

5.7.2

> <Gold.Id.Protein>

unknown|gold\_protein|mol2

> <Gold.Protein.RotatedTorsions>

[ 614 603 602 601 ] final 147.39 input 2.31 | X-H torsion

[ 841 836 835 832 ] final 87.01 input 27.02 | X-H torsion

[ 172 163 162 160 ] final -75.59 input 178.05 | X-H torsion

[ 876 867 866 864 ] final -58.42 input 173.38 | X-H torsion

> <Gold.Protein.ActiveResidues>

TYR19 ILE22 HIS23 ASP25 ASP26 HIS41 GLY42 GLU43 TRP44 LYS46  
PHE57 PRO59 SER60 ASN61 TYR62

><Gold.Protein.RotatedAtoms>

20.3589 -1.3079 -29.4814 H 0 0 0 0 0 0 0 0 0 0 0 0 # atno 172 bound\_to 163  
13.1825 0.5999 -22.4041 H 0 0 0 0 0 0 0 0 0 0 0 0 # atno 614 bound\_to 603  
14.2035 -0.6368 -22.9625 H 0 0 0 0 0 0 0 0 0 0 0 0 # atno 615 bound\_to 603  
12.6388 -1.0064 -22.4148 H 0 0 0 0 0 0 0 0 0 0 0 0 # atno 616 bound\_to 603  
17.0677 -13.8520 -27.5139 H 0 0 0 0 0 0 0 0 0 0 0 0 # atno 841 bound\_to 836  
24.5039 -6.9535 -34.7837 H 0 0 0 0 0 0 0 0 0 0 0 0 # atno 876 bound\_to 867  
18.1327 -14.0816 -28.6910 LP 0 0 0 0 0 0 0 0 0 0 0 0 # atno 987 bound\_to 836  
16.5449 -14.3720 -28.9384 LP 0 0 0 0 0 0 0 0 0 0 0 0 # atno 988 bound\_to 836  
21.1201 -1.5554 -30.8721 LP 0 0 0 0 0 0 0 0 0 0 0 0 # atno 998 bound\_to 163  
21.2990 -0.1465 -30.0662 LP 0 0 0 0 0 0 0 0 0 0 0 0 # atno 999 bound\_to 163  
25.1885 -5.6352 -34.1777 LP 0 0 0 0 0 0 0 0 0 0 0 0 # atno 1000 bound\_to 867  
23.5678 -5.7221 -34.3577 LP 0 0 0 0 0 0 0 0 0 0 0 0 # atno 1001 bound\_to 867

><Gold.Score>

| Score | S(PLP) | S(hbond) | S(cho) | S(metal) | DE(clash) | DE(tors) | intcor |
|-------|--------|----------|--------|----------|-----------|----------|--------|
| 51.13 | -44.97 | 2.19     | 0.00   | 0.00     | 0.00      | 0.30     | 0.17   |

><Gold.PLP.Fitness>

51.1263

> <Gold.PLP.PLP>

-44.9750

> <Gold.PLP.part.hbond>

-1.5196

> <Gold.PLP.part.metal>

0.0000

> <Gold.PLP.part.buried>

-4.4629

> <Gold.PLP.part.nonpolar>

-40.1599

> <Gold.PLP.part.repulsive>

0.1133

> <Gold.PLP.ligand.clash>

0.0000

> <Gold.PLP.ligand.torsion>

0.3020

> <Gold.PLP.Chemscore.Hbond>

2.1936

> <Gold.PLP.Chemscore.CHOScore>

0.0000

> <Gold.PLP.Chemscore.Metal>

0.0000

> <Gold.Chemscore.Hbonds>

donor molecule, donor type, donor heavy atom, donor atom, acceptor molecule, acceptor atom, score

L1 H 36 59 P1 249 0.19

L1 H 46 65 P1 249 2.00

> <Gold.PLP.Chemscore.Internal.Correction>

0.1743

# Name: \*\*\*\*\*

# Creating user name zbl

# Creation time: Thu Jun 13 10:31:11 2019

# File generated by GOLD software.

#

@<TRIPOS>MOLECULE

\*\*\*\*\*|pRh-6|mol2|1|dock4

85 91 1

SMALL

USER\_CHARGES

@<TRIPOS>ATOM

|      |         |         |          |       |       |        |
|------|---------|---------|----------|-------|-------|--------|
| 1 Cr | 20.0302 | -1.8991 | -35.1943 | Cr.oh | 1 <1> | 0.0000 |
| 2 C  | 20.7845 | -3.6487 | -33.0400 | C.2   | 1 <1> | 0.0000 |
| 3 C  | 21.2741 | -4.8984 | -32.3983 | C.3   | 1 <1> | 0.0000 |
| 4 C  | 17.5356 | -1.8353 | -33.7771 | C.2   | 1 <1> | 0.0000 |
| 5 C  | 16.0721 | -2.0626 | -33.5990 | C.3   | 1 <1> | 0.0000 |
| 6 H  | 21.9838 | -4.7076 | -31.8871 | H     | 1 <1> | 0.0000 |
| 7 H  | 21.3655 | -5.5128 | -32.9021 | H     | 1 <1> | 0.0000 |
| 8 H  | 20.7165 | -5.2022 | -31.6667 | H     | 1 <1> | 0.0000 |

S127

|       |         |         |          |       |       |        |
|-------|---------|---------|----------|-------|-------|--------|
| 9 H   | 15.7564 | -2.9572 | -34.1981 | H     | 1 <1> | 0.0000 |
| 10 H  | 15.5496 | -1.9274 | -34.5827 | H     | 1 <1> | 0.0000 |
| 11 O  | 20.5800 | -3.6298 | -34.2869 | O.co2 | 1 <1> | 0.0000 |
| 12 O  | 19.5344 | -0.0947 | -35.9836 | O.co2 | 1 <1> | 0.0000 |
| 13 O  | 18.0848 | -2.2548 | -34.8372 | O.co2 | 1 <1> | 0.0000 |
| 14 O  | 21.9777 | -1.4984 | -35.4210 | O.co2 | 1 <1> | 0.0000 |
| 15 Cr | 20.1071 | -0.8308 | -33.0889 | Cr.oh | 1 <1> | 0.0000 |
| 16 O  | 20.6029 | -2.6352 | -32.2996 | O.co2 | 1 <1> | 0.0000 |
| 17 C  | 19.3528 | 0.9188  | -35.2432 | C.2   | 1 <1> | 0.0000 |
| 18 O  | 18.1596 | -1.2316 | -32.8622 | O.co2 | 1 <1> | 0.0000 |
| 19 C  | 22.6017 | -0.8946 | -34.5062 | C.2   | 1 <1> | 0.0000 |
| 20 O  | 19.5574 | 0.8999  | -33.9963 | O.co2 | 1 <1> | 0.0000 |
| 21 O  | 22.0525 | -0.4751 | -33.4460 | O.co2 | 1 <1> | 0.0000 |
| 22 C  | 18.8632 | 2.1685  | -35.8849 | C.3   | 1 <1> | 0.0000 |
| 23 C  | 24.0652 | -0.6674 | -34.6842 | C.3   | 1 <1> | 0.0000 |
| 24 H  | 18.1535 | 1.9777  | -36.3961 | H     | 1 <1> | 0.0000 |
| 25 H  | 18.7718 | 2.7829  | -35.3812 | H     | 1 <1> | 0.0000 |
| 26 H  | 19.4208 | 2.4723  | -36.6165 | H     | 1 <1> | 0.0000 |
| 27 H  | 24.4888 | -0.8131 | -33.9115 | H     | 1 <1> | 0.0000 |
| 28 H  | 24.3896 | -1.0728 | -35.3797 | H     | 1 <1> | 0.0000 |
| 29 H  | 24.1431 | 0.1665  | -34.7004 | H     | 1 <1> | 0.0000 |
| 30 C  | 12.3929 | 0.9091  | -29.1585 | C.3   | 1 <1> | 0.0000 |



|      |         |         |          |       |       |        |
|------|---------|---------|----------|-------|-------|--------|
| 31 C | 12.8522 | -0.2540 | -30.0481 | C.3   | 1 <1> | 0.0000 |
| 32 N | 14.2883 | -0.6671 | -29.7433 | N.4   | 1 <1> | 0.0000 |
| 33 C | 14.6845 | -0.7063 | -28.2668 | C.3   | 1 <1> | 0.0000 |
| 34 C | 14.1348 | 0.4988  | -27.4903 | C.3   | 1 <1> | 0.0000 |
| 35 N | 12.6818 | 0.4293  | -27.7816 | N.pl3 | 1 <1> | 0.0000 |
| 36 N | 8.5108  | -2.8071 | -22.5940 | N.pl3 | 1 <1> | 0.0000 |
| 37 C | 10.0800 | -1.6183 | -25.4048 | C.ar  | 1 <1> | 0.0000 |
| 38 C | 10.0685 | -1.7399 | -26.7437 | C.ar  | 1 <1> | 0.0000 |
| 39 C | 10.9110 | -1.0426 | -27.5241 | C.ar  | 1 <1> | 0.0000 |
| 40 C | 11.8335 | -0.1844 | -27.0368 | C.ar  | 1 <1> | 0.0000 |
| 41 C | 11.8025 | -0.0650 | -25.6893 | C.ar  | 1 <1> | 0.0000 |
| 42 C | 10.9590 | -0.7433 | -24.8852 | C.ar  | 1 <1> | 0.0000 |
| 43 C | 10.9812 | -0.5769 | -23.5499 | C.ar  | 1 <1> | 0.0000 |
| 44 C | 10.1414 | -1.2790 | -22.7781 | C.ar  | 1 <1> | 0.0000 |
| 45 C | 9.2933  | -2.1513 | -23.3487 | C.ar  | 1 <1> | 0.0000 |
| 46 N | 9.2699  | -2.3168 | -24.6452 | N.pl3 | 1 <1> | 0.0000 |
| 47 C | 14.7399 | -1.9651 | -30.3850 | C.3   | 1 <1> | 0.0000 |
| 48 C | 15.0540 | -1.5695 | -32.1840 | C.3   | 1 <1> | 0.0000 |
| 49 H | 11.3463 | 1.2214  | -29.3504 | H     | 1 <1> | 0.0000 |
| 50 H | 12.9863 | 1.8231  | -29.3917 | H     | 1 <1> | 0.0000 |
| 51 H | 12.7706 | 0.0417  | -31.1200 | H     | 1 <1> | 0.0000 |
| 52 H | 12.1410 | -1.0809 | -29.8331 | H     | 1 <1> | 0.0000 |

|         |         |         |             |       |        |
|---------|---------|---------|-------------|-------|--------|
| 53 H    | 14.8827 | 0.0868  | -30.1643 H  | 1 <1> | 0.0000 |
| 54 H    | 15.7978 | -0.7159 | -28.1912 H  | 1 <1> | 0.0000 |
| 55 H    | 14.2895 | -1.6335 | -27.7894 H  | 1 <1> | 0.0000 |
| 56 H    | 14.4226 | 0.4938  | -26.4210 H  | 1 <1> | 0.0000 |
| 57 H    | 14.5745 | 1.4438  | -27.8854 H  | 1 <1> | 0.0000 |
| 58 H    | 8.5211  | -2.6761 | -21.5513 H  | 1 <1> | 0.0000 |
| 59 H    | 7.8391  | -3.5012 | -23.0088 H  | 1 <1> | 0.0000 |
| 60 H    | 9.3660  | -2.4436 | -27.2215 H  | 1 <1> | 0.0000 |
| 61 H    | 10.8205 | -1.2596 | -28.6000 H  | 1 <1> | 0.0000 |
| 62 H    | 12.5026 | 0.6035  | -25.1673 H  | 1 <1> | 0.0000 |
| 63 H    | 11.6750 | 0.1335  | -23.0693 H  | 1 <1> | 0.0000 |
| 64 H    | 10.1557 | -1.1299 | -21.6844 H  | 1 <1> | 0.0000 |
| 65 H    | 8.6098  | -2.9890 | -25.0593 H  | 1 <1> | 0.0000 |
| 66 H    | 13.9174 | -2.7205 | -30.4150 H  | 1 <1> | 0.0000 |
| 67 H    | 15.6594 | -2.5191 | -30.0696 H  | 1 <1> | 0.0000 |
| 68 H    | 14.0714 | -1.3010 | -32.6400 H  | 1 <1> | 0.0000 |
| 69 H    | 15.5491 | -0.5730 | -32.0314 H  | 1 <1> | 0.0000 |
| 70 **** | 20.2615 | -2.7911 | -34.7287 LP | 1 <1> | 0.0000 |
| 71 **** | 20.7366 | -4.4535 | -34.8319 LP | 1 <1> | 0.0000 |
| 72 **** | 19.8524 | -0.9548 | -35.5846 LP | 1 <1> | 0.0000 |
| 73 **** | 19.3597 | -0.0339 | -36.9663 LP | 1 <1> | 0.0000 |
| 74 **** | 19.0640 | -2.1133 | -34.9828 LP | 1 <1> | 0.0000 |

|         |         |         |             |       |        |
|---------|---------|---------|-------------|-------|--------|
| 75 **** | 17.5396 | -2.7277 | -35.5294 LP | 1 <1> | 0.0000 |
| 76 **** | 20.9965 | -1.6677 | -35.3293 LP | 1 <1> | 0.0000 |
| 77 **** | 22.4643 | -1.8077 | -36.2381 LP | 1 <1> | 0.0000 |
| 78 **** | 20.2849 | -1.7751 | -32.6986 LP | 1 <1> | 0.0000 |
| 79 **** | 20.7777 | -2.6960 | -31.3169 LP | 1 <1> | 0.0000 |
| 80 **** | 19.1409 | -1.0622 | -32.9539 LP | 1 <1> | 0.0000 |
| 81 **** | 17.6730 | -0.9222 | -32.0451 LP | 1 <1> | 0.0000 |
| 82 **** | 19.8759 | 0.0612  | -33.5545 LP | 1 <1> | 0.0000 |
| 83 **** | 19.4007 | 1.7236  | -33.4513 LP | 1 <1> | 0.0000 |
| 84 **** | 21.0733 | -0.6166 | -33.3004 LP | 1 <1> | 0.0000 |
| 85 **** | 22.5977 | -0.0023 | -32.7538 LP | 1 <1> | 0.0000 |

@<TRIPOS>BOND

- 1 1 11 ar
- 2 1 12 ar
- 3 1 13 ar
- 4 1 14 ar
- 5 1 15 1
- 6 2 3 1
- 7 2 11 ar
- 8 2 16 ar
- 9 3 6 1
- 10 3 7 1

11 3 8 1  
12 4 5 1  
13 4 13 ar  
14 4 18 ar  
15 5 9 1  
16 5 10 1  
17 5 48 1  
18 12 17 ar  
19 14 19 ar  
20 15 16 ar  
21 15 18 ar  
22 15 20 ar  
23 15 21 ar  
24 17 20 ar  
25 17 22 1  
26 19 21 ar  
27 19 23 1  
28 22 24 1  
29 22 25 1  
30 22 26 1  
31 23 27 1  
32 23 28 1

33 23 29 1  
34 30 31 1  
35 30 35 1  
36 30 49 1  
37 30 50 1  
38 31 32 1  
39 31 51 1  
40 31 52 1  
41 32 33 1  
42 32 47 1  
43 32 53 1  
44 33 34 1  
45 33 54 1  
46 33 55 1  
47 34 35 1  
48 34 56 1  
49 34 57 1  
50 35 40 1  
51 36 45 1  
52 36 58 1  
53 36 59 1  
54 37 38 ar

55 37 42 ar

56 37 46 ar

57 38 39 ar

58 38 60 1

59 39 40 ar

60 39 61 1

61 40 41 ar

62 41 42 ar

63 41 62 1

64 42 43 ar

65 43 44 ar

66 43 63 1

67 44 45 ar

68 44 64 1

69 45 46 ar

70 46 65 1

71 47 48 1

72 47 66 1

73 47 67 1

74 48 68 1

75 48 69 1

76 11 70 1

77 11 71 1

78 12 72 1

79 12 73 1

80 13 74 1

81 13 75 1

82 14 76 1

83 14 77 1

84 16 78 1

85 16 79 1

86 18 80 1

87 18 81 1

88 20 82 1

89 20 83 1

90 21 84 1

91 21 85 1

@<TRIPOS>SUBSTRUCTURE

1 \*\*\*\* 1

@<TRIPOS>SET

LONE\_PAIRS STATIC ATOMS <user> \*\*\*\* ""

16 70 71 72 73 74 75 76 77 78 79 80 81 82 83 84 85

DONOR\_HYDROGENS STATIC ATOMS <user> \*\*\*\* ""

4 53 58 59 65

ATOM\$BLUE    STATIC    ATOMS    COLORGROUP SYSTEM

16 70 71 72 73 74 75 76 77 78 79 80 81 82 83 84 85

ATOM\$RED     STATIC    ATOMS    COLORGROUP SYSTEM

4 53 58 59 65

@<TRIPOS>COMMENT

> <Gold.Version>

5.7.2

> <Gold.Id.Protein>

unknown|gold\_protein|mol2

> <Gold.Protein.RotatedTorsions>

[ 614 603 602 601 ] final 160.93 input 2.31 | X-H torsion

[ 841 836 835 832 ] final -90.20 input 27.02 | X-H torsion

[ 172 163 162 160 ] final -177.98 input 178.05 | X-H torsion

[ 876 867 866 864 ] final -48.41 input 173.38 | X-H torsion

> <Gold.Protein.ActiveResidues>

TYR19 ILE22 HIS23 ASP25 ASP26 HIS41 GLY42 GLU43 TRP44 LYS46

PHE57 PRO59 SER60 ASN61 TYR62

> <Gold.Protein.RotatedAtoms>



20.9711 -1.7241 -30.6979 H 0 0 0 0 0 0 0 0 0 0 0 0 0 # atno 172 bound\_to 163  
 13.3982 0.6239 -22.4834 H 0 0 0 0 0 0 0 0 0 0 0 0 0 # atno 614 bound\_to 603  
 14.1062 -0.8463 -22.9536 H 0 0 0 0 0 0 0 0 0 0 0 0 0 # atno 615 bound\_to 603  
 12.5208 -0.8207 -22.3446 H 0 0 0 0 0 0 0 0 0 0 0 0 0 # atno 616 bound\_to 603  
 17.4621 -14.2861 -29.2421 H 0 0 0 0 0 0 0 0 0 0 0 0 0 # atno 841 bound\_to 836  
 24.3450 -6.9493 -34.7956 H 0 0 0 0 0 0 0 0 0 0 0 0 0 # atno 876 bound\_to 867  
 16.3517 -14.1593 -28.0916 LP 0 0 0 0 0 0 0 0 0 0 0 0 0 # atno 987 bound\_to 836  
 17.9222 -13.8499 -27.7688 LP 0 0 0 0 0 0 0 0 0 0 0 0 0 # atno 988 bound\_to 836  
 21.4260 -0.2328 -30.3185 LP 0 0 0 0 0 0 0 0 0 0 0 0 0 # atno 998 bound\_to 163  
 20.3672 -1.0437 -29.3761 LP 0 0 0 0 0 0 0 0 0 0 0 0 0 # atno 999 bound\_to 163  
 25.2707 -5.7673 -34.2300 LP 0 0 0 0 0 0 0 0 0 0 0 0 0 # atno 1000 bound\_to 867  
 23.6481 -5.5944 -34.2932 LP 0 0 0 0 0 0 0 0 0 0 0 0 0 # atno 1001 bound\_to 867

><Gold.Score>

| Score | S(PLP) | S(hbond) | S(cho) | S(metal) | DE(clash) | DE(tors) | intcor |
|-------|--------|----------|--------|----------|-----------|----------|--------|
| 61.18 | -60.16 | 1.00     | 0.00   | 0.00     | 0.00      | 1.08     | 0.17   |

><Gold.PLP.Fitness>

61.1772

><Gold.PLP.PLP>

-60.1569

> <Gold.PLP.part.hbond>

-2.0000

> <Gold.PLP.part.metal>

0.0000

> <Gold.PLP.part.buried>

-1.9107

> <Gold.PLP.part.nonpolar>

-57.2527

> <Gold.PLP.part.repulsive>

0.3575

> <Gold.PLP.ligand.clash>

0.0000

> <Gold.PLP.ligand.torsion>

1.0759

> <Gold.PLP.Chemscore.Hbond>

1.0000

> <Gold.PLP.Chemscore.CHOScore>

0.0000

> <Gold.PLP.Chemscore.Metal>

0.0000

> <Gold.Chemscore.Hbonds>

donor molecule, donor type, donor heavy atom, donor atom, acceptor molecule, acceptor atom, score

P1 H 163 172 L1 16 1.00

> <Gold.PLP.Chemscore.Internal.Correction>

0.1721

# Name: \*\*\*\*\*

# Creating user name zbl

# Creation time: Thu Jun 13 10:31:13 2019

# File generated by GOLD software.

#

@<TRIPOS>MOLECULE

\*\*\*\*\*|pRh-6|mol2|1|dock5

85 91 1

SMALL

USER\_CHARGES

@<TRIPOS>ATOM

|      |         |         |          |       |       |        |
|------|---------|---------|----------|-------|-------|--------|
| 1 Cr | 8.5420  | -0.0156 | -25.9235 | Cr.oh | 1 <1> | 0.0000 |
| 2 C  | 11.3959 | -0.3707 | -25.9378 | C.2   | 1 <1> | 0.0000 |
| 3 C  | 12.8065 | -0.1080 | -26.3306 | C.3   | 1 <1> | 0.0000 |
| 4 C  | 8.5655  | -2.7807 | -26.6913 | C.2   | 1 <1> | 0.0000 |
| 5 C  | 8.3038  | -3.9384 | -27.5948 | C.3   | 1 <1> | 0.0000 |
| 6 H  | 13.2883 | 0.0662  | -25.5964 | H     | 1 <1> | 0.0000 |
| 7 H  | 12.8890 | 0.4141  | -26.9306 | H     | 1 <1> | 0.0000 |
| 8 H  | 13.2969 | -0.9080 | -26.5712 | H     | 1 <1> | 0.0000 |
| 9 H  | 7.4377  | -3.7004 | -28.2672 | H     | 1 <1> | 0.0000 |
| 10 H | 7.2876  | -4.3612 | -27.3773 | H     | 1 <1> | 0.0000 |
| 11 O | 10.4620 | 0.2402  | -26.5309 | O.co2 | 1 <1> | 0.0000 |
| 12 O | 6.6746  | -0.3207 | -25.1856 | O.co2 | 1 <1> | 0.0000 |
| 13 O | 8.3102  | -1.6163 | -27.1163 | O.co2 | 1 <1> | 0.0000 |

S140

|       |         |         |          |       |       |        |
|-------|---------|---------|----------|-------|-------|--------|
| 14 O  | 8.8343  | 1.4959  | -24.6450 | O.co2 | 1 <1> | 0.0000 |
| 15 Cr | 9.3196  | -1.5044 | -24.2628 | Cr.oh | 1 <1> | 0.0000 |
| 16 O  | 11.1869 | -1.1993 | -25.0007 | O.co2 | 1 <1> | 0.0000 |
| 17 C  | 6.4657  | -1.1493 | -24.2485 | C.2   | 1 <1> | 0.0000 |
| 18 O  | 9.0273  | -3.0159 | -25.5414 | O.co2 | 1 <1> | 0.0000 |
| 19 C  | 9.2961  | 1.2607  | -23.4951 | C.2   | 1 <1> | 0.0000 |
| 20 O  | 7.3996  | -1.7602 | -23.6555 | O.co2 | 1 <1> | 0.0000 |
| 21 O  | 9.5513  | 0.0963  | -23.0700 | O.co2 | 1 <1> | 0.0000 |
| 22 C  | 5.0550  | -1.4120 | -23.8558 | C.3   | 1 <1> | 0.0000 |
| 23 C  | 9.5577  | 2.4184  | -22.5915 | C.3   | 1 <1> | 0.0000 |
| 24 H  | 4.5732  | -1.5861 | -24.5899 | H     | 1 <1> | 0.0000 |
| 25 H  | 4.9725  | -1.9341 | -23.2557 | H     | 1 <1> | 0.0000 |
| 26 H  | 4.5646  | -0.6119 | -23.6151 | H     | 1 <1> | 0.0000 |
| 27 H  | 10.3290 | 2.2942  | -22.1586 | H     | 1 <1> | 0.0000 |
| 28 H  | 9.4605  | 3.1855  | -22.9858 | H     | 1 <1> | 0.0000 |
| 29 H  | 9.0426  | 2.2934  | -21.9430 | H     | 1 <1> | 0.0000 |
| 30 C  | 10.8736 | -1.9884 | -31.0483 | C.3   | 1 <1> | 0.0000 |
| 31 C  | 10.7546 | -3.0307 | -29.9283 | C.3   | 1 <1> | 0.0000 |
| 32 N  | 10.6187 | -4.4449 | -30.4829 | N.4   | 1 <1> | 0.0000 |
| 33 C  | 11.5029 | -4.7919 | -31.6813 | C.3   | 1 <1> | 0.0000 |
| 34 C  | 11.5558 | -3.6514 | -32.7080 | C.3   | 1 <1> | 0.0000 |
| 35 N  | 11.9933 | -2.4995 | -31.8818 | N.pl3 | 1 <1> | 0.0000 |

|      |         |         |          |       |       |        |
|------|---------|---------|----------|-------|-------|--------|
| 36 N | 19.2436 | -1.0241 | -32.0767 | N.pl3 | 1 <1> | 0.0000 |
| 37 C | 15.9217 | -1.5347 | -31.3838 | C.ar  | 1 <1> | 0.0000 |
| 38 C | 15.0441 | -1.4961 | -30.3660 | C.ar  | 1 <1> | 0.0000 |
| 39 C | 13.7448 | -1.7897 | -30.5413 | C.ar  | 1 <1> | 0.0000 |
| 40 C | 13.2219 | -2.1545 | -31.7324 | C.ar  | 1 <1> | 0.0000 |
| 41 C | 14.1243 | -2.1588 | -32.7406 | C.ar  | 1 <1> | 0.0000 |
| 42 C | 15.4300 | -1.8560 | -32.5935 | C.ar  | 1 <1> | 0.0000 |
| 43 C | 16.2752 | -1.8799 | -33.6406 | C.ar  | 1 <1> | 0.0000 |
| 44 C | 17.5699 | -1.5905 | -33.4572 | C.ar  | 1 <1> | 0.0000 |
| 45 C | 18.0110 | -1.2904 | -32.2238 | C.ar  | 1 <1> | 0.0000 |
| 46 N | 17.1935 | -1.2677 | -31.2040 | N.pl3 | 1 <1> | 0.0000 |
| 47 C | 10.7546 | -5.5581 | -29.4616 | C.3   | 1 <1> | 0.0000 |
| 48 C | 9.4925  | -5.1955 | -28.1322 | C.3   | 1 <1> | 0.0000 |
| 49 H | 10.9869 | -0.9514 | -30.6723 | H     | 1 <1> | 0.0000 |
| 50 H | 9.9273  | -1.9524 | -31.6359 | H     | 1 <1> | 0.0000 |
| 51 H | 9.8698  | -2.7950 | -29.2920 | H     | 1 <1> | 0.0000 |
| 52 H | 11.6852 | -2.9203 | -29.3304 | H     | 1 <1> | 0.0000 |
| 53 H | 9.6363  | -4.5014 | -30.8445 | H     | 1 <1> | 0.0000 |
| 54 H | 11.1025 | -5.7105 | -32.1723 | H     | 1 <1> | 0.0000 |
| 55 H | 12.5447 | -4.9981 | -31.3409 | H     | 1 <1> | 0.0000 |
| 56 H | 12.1820 | -3.8900 | -33.5896 | H     | 1 <1> | 0.0000 |
| 57 H | 10.5423 | -3.4716 | -33.1355 | H     | 1 <1> | 0.0000 |

|         |         |         |             |       |        |
|---------|---------|---------|-------------|-------|--------|
| 58 H    | 19.9058 | -1.0362 | -32.8927 H  | 1 <1> | 0.0000 |
| 59 H    | 19.6212 | -0.7907 | -31.1238 H  | 1 <1> | 0.0000 |
| 60 H    | 15.3950 | -1.2372 | -29.3527 H  | 1 <1> | 0.0000 |
| 61 H    | 13.1412 | -1.7524 | -29.6210 H  | 1 <1> | 0.0000 |
| 62 H    | 13.8259 | -2.4372 | -33.7619 H  | 1 <1> | 0.0000 |
| 63 H    | 15.9259 | -2.1280 | -34.6572 H  | 1 <1> | 0.0000 |
| 64 H    | 18.2564 | -1.6001 | -34.3216 H  | 1 <1> | 0.0000 |
| 65 H    | 17.5543 | -1.0327 | -30.2692 H  | 1 <1> | 0.0000 |
| 66 H    | 11.7329 | -5.5102 | -28.9244 H  | 1 <1> | 0.0000 |
| 67 H    | 10.5848 | -6.6373 | -29.7028 H  | 1 <1> | 0.0000 |
| 68 H    | 8.9976  | -6.1617 | -27.8736 H  | 1 <1> | 0.0000 |
| 69 H    | 10.2123 | -5.0388 | -27.2845 H  | 1 <1> | 0.0000 |
| 70 **** | 9.5113  | 0.0783  | -26.2661 LP | 1 <1> | 0.0000 |
| 71 **** | 10.6736 | 0.8855  | -27.2649 LP | 1 <1> | 0.0000 |
| 72 **** | 7.6096  | -0.1278 | -25.4833 LP | 1 <1> | 0.0000 |
| 73 **** | 5.9044  | 0.1399  | -25.6268 LP | 1 <1> | 0.0000 |
| 74 **** | 8.4741  | -0.8229 | -26.5300 LP | 1 <1> | 0.0000 |
| 75 **** | 7.9447  | -1.4895 | -28.0384 LP | 1 <1> | 0.0000 |
| 76 **** | 8.6509  | 0.7407  | -25.2742 LP | 1 <1> | 0.0000 |
| 77 **** | 8.6515  | 2.4376  | -24.9274 LP | 1 <1> | 0.0000 |
| 78 **** | 10.2519 | -1.3922 | -24.7030 LP | 1 <1> | 0.0000 |
| 79 **** | 11.9571 | -1.6598 | -24.5595 LP | 1 <1> | 0.0000 |

|         |                            |       |        |
|---------|----------------------------|-------|--------|
| 80 **** | 9.2107 -2.2607 -24.9121 LP | 1 <1> | 0.0000 |
| 81 **** | 9.2101 -3.9576 -25.2590 LP | 1 <1> | 0.0000 |
| 82 **** | 8.3502 -1.5983 -23.9202 LP | 1 <1> | 0.0000 |
| 83 **** | 7.1880 -2.4054 -22.9214 LP | 1 <1> | 0.0000 |
| 84 **** | 9.3875 -0.6971 -23.6563 LP | 1 <1> | 0.0000 |
| 85 **** | 9.9168 -0.0304 -22.1479 LP | 1 <1> | 0.0000 |

@<TRIPOS>BOND

1 1 11 ar  
2 1 12 ar  
3 1 13 ar  
4 1 14 ar  
5 1 15 1  
6 2 3 1  
7 2 11 ar  
8 2 16 ar  
9 3 6 1  
10 3 7 1  
11 3 8 1  
12 4 5 1  
13 4 13 ar  
14 4 18 ar  
15 5 9 1



16 5 10 1  
17 5 48 1  
18 12 17 ar  
19 14 19 ar  
20 15 16 ar  
21 15 18 ar  
22 15 20 ar  
23 15 21 ar  
24 17 20 ar  
25 17 22 1  
26 19 21 ar  
27 19 23 1  
28 22 24 1  
29 22 25 1  
30 22 26 1  
31 23 27 1  
32 23 28 1  
33 23 29 1  
34 30 31 1  
35 30 35 1  
36 30 49 1  
37 30 50 1

38 31 32 1  
39 31 51 1  
40 31 52 1  
41 32 33 1  
42 32 47 1  
43 32 53 1  
44 33 34 1  
45 33 54 1  
46 33 55 1  
47 34 35 1  
48 34 56 1  
49 34 57 1  
50 35 40 1  
51 36 45 1  
52 36 58 1  
53 36 59 1  
54 37 38 ar  
55 37 42 ar  
56 37 46 ar  
57 38 39 ar  
58 38 60 1  
59 39 40 ar

60 39 61 1  
61 40 41 ar  
62 41 42 ar  
63 41 62 1  
64 42 43 ar  
65 43 44 ar  
66 43 63 1  
67 44 45 ar  
68 44 64 1  
69 45 46 ar  
70 46 65 1  
71 47 48 1  
72 47 66 1  
73 47 67 1  
74 48 68 1  
75 48 69 1  
76 11 70 1  
77 11 71 1  
78 12 72 1  
79 12 73 1  
80 13 74 1  
81 13 75 1

82 14 76 1

83 14 77 1

84 16 78 1

85 16 79 1

86 18 80 1

87 18 81 1

88 20 82 1

89 20 83 1

90 21 84 1

91 21 85 1

@<TRIPOS>SUBSTRUCTURE

1 \*\*\*\* 1

@<TRIPOS>SET

LONE\_PAIRS STATIC ATOMS <user> \*\*\*\* ""

16 70 71 72 73 74 75 76 77 78 79 80 81 82 83 84 85

DONOR\_HYDROGENS STATIC ATOMS <user> \*\*\*\* ""

4 53 58 59 65

ATOM\$BLUE STATIC ATOMS COLORGROUP SYSTEM

16 70 71 72 73 74 75 76 77 78 79 80 81 82 83 84 85

ATOM\$RED STATIC ATOMS COLORGROUP SYSTEM

4 53 58 59 65

@<TRIPOS>COMMENT

><Gold.Version>

5.7.2

><Gold.Id.Protein>

unknown|gold\_protein|mol2

><Gold.Protein.RotatedTorsions>

[ 614 603 602 601 ] final -85.27 input 2.31 | X-H torsion

[ 841 836 835 832 ] final -72.43 input 27.02 | X-H torsion

[ 172 163 162 160 ] final -56.35 input 178.05 | X-H torsion

[ 876 867 866 864 ] final -1.15 input 173.38 | X-H torsion

><Gold.Protein.ActiveResidues>

TYR19 ILE22 HIS23 ASP25 ASP26 HIS41 GLY42 GLU43 TRP44 LYS46

PHE57 PRO59 SER60 ASN61 TYR62

><Gold.Protein.RotatedAtoms>

20.4245 -1.0318 -29.3685 H 0 0 0 0 0 0 0 0 0 0 0 0 # atno 172 bound\_to 163

14.1562 -0.7528 -22.9600 H 0 0 0 0 0 0 0 0 0 0 0 0 # atno 614 bound\_to 603

12.5700 -0.9121 -22.3748 H 0 0 0 0 0 0 0 0 0 0 0 0 # atno 615 bound\_to 603

13.3010 0.6193 -22.4479 H 0 0 0 0 0 0 0 0 0 0 0 0 # atno 616 bound\_to 603

17.7196 -14.2232 -29.1460 H 0 0 0 0 0 0 0 0 0 0 0 0 # atno 841 bound\_to 836

23.7020 -6.6123 -34.6997 H 0 0 0 0 0 0 0 0 0 0 0 0 0 # atno 876 bound\_to 867  
16.3171 -14.2423 -28.3679 LP 0 0 0 0 0 0 0 0 0 0 0 0 # atno 987 bound\_to 836  
17.6933 -13.8314 -27.5909 LP 0 0 0 0 0 0 0 0 0 0 0 0 # atno 988 bound\_to 836  
20.9194 -1.7430 -30.7191 LP 0 0 0 0 0 0 0 0 0 0 0 0 # atno 998 bound\_to 163  
21.4326 -0.2412 -30.3346 LP 0 0 0 0 0 0 0 0 0 0 0 0 # atno 999 bound\_to 163  
25.2905 -6.4552 -34.5383 LP 0 0 0 0 0 0 0 0 0 0 0 0 # atno 1000 bound\_to 867  
24.2857 -5.2510 -34.0831 LP 0 0 0 0 0 0 0 0 0 0 0 0 # atno 1001 bound\_to 867

><Gold.Score>

| Score | S(PLP) | S(hbond) | S(cho) | S(metal) | DE(clash) | DE(tors) | intcor |
|-------|--------|----------|--------|----------|-----------|----------|--------|
| 65.79 | -56.65 | 3.71     | 0.00   | 0.00     | 0.00      | 1.07     | 0.14   |

><Gold.PLP.Fitness>

65.7925

><Gold.PLP.PLP>

-56.6550

><Gold.PLP.part.hbond>

-3.0000

><Gold.PLP.part.metal>

0.0000

> <Gold.PLP.part.buried>

-7.3347

> <Gold.PLP.part.nonpolar>

-47.5246

> <Gold.PLP.part.repulsive>

0.2140

> <Gold.PLP.ligand.clash>

0.0000

> <Gold.PLP.ligand.torsion>

1.0690

> <Gold.PLP.Chemscore.Hbond>

3.7120

> <Gold.PLP.Chemscore.CHOScore>

0.0000

><Gold.PLP.Chemscore.Metal>

0.0000

><Gold.Chemscore.Hbonds>

donor molecule, donor type, donor heavy atom, donor atom, acceptor molecule, acceptor atom, score

L1 H 36 59 P1 261 1.82

L1 H 46 65 P1 261 1.89

><Gold.PLP.Chemscore.Internal.Correction>

0.1396

# Name: \*\*\*\*\*

# Creating user name zbl

# Creation time: Thu Jun 13 10:31:14 2019

# File generated by GOLD software.

#

@<TRIPOS>MOLECULE

\*\*\*\*\*|pRh-6|mol2|1|dock6

85 91 1



SMALL

USER\_CHARGES

@<TRIPOS>ATOM

|       |                                |       |        |
|-------|--------------------------------|-------|--------|
| 1 Cr  | 6.9110 -10.5355 -32.8301 Cr.oh | 1 <1> | 0.0000 |
| 2 C   | 6.1772 -9.8186 -30.1434 C.2    | 1 <1> | 0.0000 |
| 3 C   | 5.4160 -9.1228 -29.0711 C.3    | 1 <1> | 0.0000 |
| 4 C   | 9.4835 -9.5827 -31.9873 C.2    | 1 <1> | 0.0000 |
| 5 C   | 10.6738 -8.6843 -32.0221 C.3   | 1 <1> | 0.0000 |
| 6 H   | 5.0596 -9.7325 -28.5209 H      | 1 <1> | 0.0000 |
| 7 H   | 4.9133 -8.5604 -29.3367 H      | 1 <1> | 0.0000 |
| 8 H   | 5.9805 -8.7145 -28.3980 H      | 1 <1> | 0.0000 |
| 9 H   | 11.5842 -9.2562 -31.7012 H     | 1 <1> | 0.0000 |
| 10 H  | 11.0807 -8.5613 -30.9838 H     | 1 <1> | 0.0000 |
| 11 O  | 5.9708 -9.5106 -31.3515 O.co2  | 1 <1> | 0.0000 |
| 12 O  | 7.8746 -11.6708 -34.2111 O.co2 | 1 <1> | 0.0000 |
| 13 O  | 8.5071 -9.3173 -32.7475 O.co2  | 1 <1> | 0.0000 |
| 14 O  | 5.3733 -11.8160 -32.8045 O.co2 | 1 <1> | 0.0000 |
| 15 Cr | 7.9680 -11.8502 -31.1767 Cr.oh | 1 <1> | 0.0000 |
| 16 O  | 7.0044 -10.7149 -29.7957 O.co2 | 1 <1> | 0.0000 |
| 17 C  | 8.7018 -12.5671 -33.8634 C.2   | 1 <1> | 0.0000 |

S153

|      |                                |       |        |
|------|--------------------------------|-------|--------|
| 18 O | 9.5057 -10.5697 -31.2023 O.co2 | 1 <1> | 0.0000 |
| 19 C | 5.3955 -12.8030 -32.0195 C.2   | 1 <1> | 0.0000 |
| 20 O | 8.9082 -12.8751 -32.6553 O.co2 | 1 <1> | 0.0000 |
| 21 O | 6.3719 -13.0684 -31.2593 O.co2 | 1 <1> | 0.0000 |
| 22 C | 9.4630 -13.2628 -34.9357 C.3   | 1 <1> | 0.0000 |
| 23 C | 4.2052 -13.7014 -31.9847 C.3   | 1 <1> | 0.0000 |
| 24 H | 9.8194 -12.6532 -35.4859 H     | 1 <1> | 0.0000 |
| 25 H | 9.9657 -13.8252 -34.6701 H     | 1 <1> | 0.0000 |
| 26 H | 8.8985 -13.6711 -35.6088 H     | 1 <1> | 0.0000 |
| 27 H | 4.0240 -13.9287 -31.1402 H     | 1 <1> | 0.0000 |
| 28 H | 3.5380 -13.3990 -32.4502 H     | 1 <1> | 0.0000 |
| 29 H | 4.4998 -14.4426 -32.2407 H     | 1 <1> | 0.0000 |
| 30 C | 12.1269 -3.1700 -30.7788 C.3   | 1 <1> | 0.0000 |
| 31 C | 12.3079 -4.5782 -31.3613 C.3   | 1 <1> | 0.0000 |
| 32 N | 11.8061 -4.6651 -32.7989 N.4   | 1 <1> | 0.0000 |
| 33 C | 12.1327 -3.4772 -33.7049 C.3   | 1 <1> | 0.0000 |
| 34 C | 11.9374 -2.1340 -32.9870 C.3   | 1 <1> | 0.0000 |
| 35 N | 12.7861 -2.2916 -31.7806 N.pl3 | 1 <1> | 0.0000 |
| 36 N | 19.9334 -0.5267 -32.5441 N.pl3 | 1 <1> | 0.0000 |
| 37 C | 16.7186 -1.2399 -31.5786 C.ar  | 1 <1> | 0.0000 |
| 38 C | 15.9535 -1.3512 -30.4786 C.ar  | 1 <1> | 0.0000 |
| 39 C | 14.6511 -1.6725 -30.5529 C.ar  | 1 <1> | 0.0000 |

|      |                                |       |        |
|------|--------------------------------|-------|--------|
| 40 C | 14.0142 -1.9190 -31.7186 C.ar  | 1 <1> | 0.0000 |
| 41 C | 14.8041 -1.7739 -32.8076 C.ar  | 1 <1> | 0.0000 |
| 42 C | 16.1096 -1.4399 -32.7608 C.ar  | 1 <1> | 0.0000 |
| 43 C | 16.8389 -1.3120 -33.8846 C.ar  | 1 <1> | 0.0000 |
| 44 C | 18.1378 -0.9959 -33.8023 C.ar  | 1 <1> | 0.0000 |
| 45 C | 18.6996 -0.8216 -32.5941 C.ar  | 1 <1> | 0.0000 |
| 46 N | 17.9949 -0.9466 -31.5002 N.pl3 | 1 <1> | 0.0000 |
| 47 C | 12.1764 -5.9359 -33.5395 C.3   | 1 <1> | 0.0000 |
| 48 C | 10.8998 -7.2094 -33.0495 C.3   | 1 <1> | 0.0000 |
| 49 H | 12.4961 -3.0752 -29.7375 H     | 1 <1> | 0.0000 |
| 50 H | 11.0418 -2.9300 -30.6953 H     | 1 <1> | 0.0000 |
| 51 H | 11.7584 -5.3159 -30.7312 H     | 1 <1> | 0.0000 |
| 52 H | 13.4001 -4.7770 -31.3033 H     | 1 <1> | 0.0000 |
| 53 H | 10.7606 -4.6687 -32.7216 H     | 1 <1> | 0.0000 |
| 54 H | 11.4708 -3.5143 -34.6025 H     | 1 <1> | 0.0000 |
| 55 H | 13.1933 -3.5357 -34.0446 H     | 1 <1> | 0.0000 |
| 56 H | 12.1574 -1.2613 -33.6323 H     | 1 <1> | 0.0000 |
| 57 H | 10.8673 -2.0006 -32.7054 H     | 1 <1> | 0.0000 |
| 58 H | 20.5052 -0.4204 -33.4194 H     | 1 <1> | 0.0000 |
| 59 H | 20.4040 -0.3891 -31.6142 H     | 1 <1> | 0.0000 |
| 60 H | 16.4034 -1.1962 -29.4834 H     | 1 <1> | 0.0000 |
| 61 H | 14.1480 -1.7635 -29.5776 H     | 1 <1> | 0.0000 |

|         |         |          |             |       |        |
|---------|---------|----------|-------------|-------|--------|
| 62 H    | 14.4061 | -1.9453  | -33.8184 H  | 1 <1> | 0.0000 |
| 63 H    | 16.3902 | -1.4559  | -34.8821 H  | 1 <1> | 0.0000 |
| 64 H    | 18.7285 | -0.8806  | -34.7277 H  | 1 <1> | 0.0000 |
| 65 H    | 18.4468 | -0.8059  | -30.5863 H  | 1 <1> | 0.0000 |
| 66 H    | 13.1398 | -6.3646  | -33.1706 H  | 1 <1> | 0.0000 |
| 67 H    | 12.2108 | -6.0089  | -34.6554 H  | 1 <1> | 0.0000 |
| 68 H    | 9.9165  | -6.6853  | -32.9879 H  | 1 <1> | 0.0000 |
| 69 H    | 10.8443 | -7.7484  | -34.0332 H  | 1 <1> | 0.0000 |
| 70 **** | 6.4697  | -9.9807  | -32.0796 LP | 1 <1> | 0.0000 |
| 71 **** | 5.3085  | -8.7968  | -31.5794 LP | 1 <1> | 0.0000 |
| 72 **** | 7.3534  | -11.1749 | -33.5165 LP | 1 <1> | 0.0000 |
| 73 **** | 7.7435  | -11.4600 | -35.1798 LP | 1 <1> | 0.0000 |
| 74 **** | 7.6979  | -9.9047  | -32.7457 LP | 1 <1> | 0.0000 |
| 75 **** | 8.5449  | -8.5201  | -33.3501 LP | 1 <1> | 0.0000 |
| 76 **** | 6.1553  | -11.1943 | -32.8485 LP | 1 <1> | 0.0000 |
| 77 **** | 4.5736  | -11.6551 | -33.3829 LP | 1 <1> | 0.0000 |
| 78 **** | 7.5256  | -11.2108 | -30.4903 LP | 1 <1> | 0.0000 |
| 79 **** | 7.1355  | -10.9256 | -28.8270 LP | 1 <1> | 0.0000 |
| 80 **** | 8.7237  | -11.1914 | -31.1584 LP | 1 <1> | 0.0000 |
| 81 **** | 10.3054 | -10.7306 | -30.6239 LP | 1 <1> | 0.0000 |
| 82 **** | 8.4092  | -12.4050 | -31.9272 LP | 1 <1> | 0.0000 |
| 83 **** | 9.5705  | -13.5888 | -32.4274 LP | 1 <1> | 0.0000 |

|         |                             |       |        |
|---------|-----------------------------|-------|--------|
| 84 **** | 7.1811 -12.4809 -31.2611 LP | 1 <1> | 0.0000 |
| 85 **** | 6.3341 -13.8656 -30.6568 LP | 1 <1> | 0.0000 |

@<TRIPOS>BOND

1 1 11 ar

2 1 12 ar

3 1 13 ar

4 1 14 ar

5 1 15 1

6 2 3 1

7 2 11 ar

8 2 16 ar

9 3 6 1

10 3 7 1

11 3 8 1

12 4 5 1

13 4 13 ar

14 4 18 ar

15 5 9 1

16 5 10 1

17 5 48 1

18 12 17 ar

19 14 19 ar

20 15 16 ar

21 15 18 ar

22 15 20 ar

23 15 21 ar

24 17 20 ar

25 17 22 1

26 19 21 ar

27 19 23 1

28 22 24 1

29 22 25 1

30 22 26 1

31 23 27 1

32 23 28 1

33 23 29 1

34 30 31 1

35 30 35 1

36 30 49 1

37 30 50 1

38 31 32 1

39 31 51 1

40 31 52 1

41 32 33 1

42 32 47 1  
43 32 53 1  
44 33 34 1  
45 33 54 1  
46 33 55 1  
47 34 35 1  
48 34 56 1  
49 34 57 1  
50 35 40 1  
51 36 45 1  
52 36 58 1  
53 36 59 1  
54 37 38 ar  
55 37 42 ar  
56 37 46 ar  
57 38 39 ar  
58 38 60 1  
59 39 40 ar  
60 39 61 1  
61 40 41 ar  
62 41 42 ar  
63 41 62 1

64 42 43 ar

65 43 44 ar

66 43 63 1

67 44 45 ar

68 44 64 1

69 45 46 ar

70 46 65 1

71 47 48 1

72 47 66 1

73 47 67 1

74 48 68 1

75 48 69 1

76 11 70 1

77 11 71 1

78 12 72 1

79 12 73 1

80 13 74 1

81 13 75 1

82 14 76 1

83 14 77 1

84 16 78 1

85 16 79 1



86 18 80 1

87 18 81 1

88 20 82 1

89 20 83 1

90 21 84 1

91 21 85 1

@<TRIPOS>SUBSTRUCTURE

1 \*\*\*\* 1

@<TRIPOS>SET

LONE\_PAIRS STATIC ATOMS <user> \*\*\*\* ""

16 70 71 72 73 74 75 76 77 78 79 80 81 82 83 84 85

DONOR\_HYDROGENS STATIC ATOMS <user> \*\*\*\* ""

4 53 58 59 65

ATOM\$BLUE STATIC ATOMS COLORGROUP SYSTEM

16 70 71 72 73 74 75 76 77 78 79 80 81 82 83 84 85

ATOM\$RED STATIC ATOMS COLORGROUP SYSTEM

4 53 58 59 65

@<TRIPOS>COMMENT

> <Gold.Version>

5.7.2

> <Gold.Id.Protein>

unknown|gold\_protein|mol2

><Gold.Protein.RotatedTorsions>

[ 614 603 602 601 ] final 123.45 input 2.31 | X-H torsion

[ 841 836 835 832 ] final 76.35 input 27.02 | X-H torsion

[ 172 163 162 160 ] final -81.97 input 178.05 | X-H torsion

[ 876 867 866 864 ] final -124.18 input 173.38 | X-H torsion

><Gold.Protein.ActiveResidues>

TYR19 ILE22 HIS23 ASP25 ASP26 HIS41 GLY42 GLU43 TRP44 LYS46

PHE57 PRO59 SER60 ASN61 TYR62

><Gold.Protein.RotatedAtoms>

20.3513 -1.3938 -29.5355 H 0 0 0 0 0 0 0 0 0 0 0 0 # atno 172 bound\_to 163

12.8300 0.4311 -22.2921 H 0 0 0 0 0 0 0 0 0 0 0 0 # atno 614 bound\_to 603

14.2566 -0.2351 -22.9284 H 0 0 0 0 0 0 0 0 0 0 0 0 # atno 615 bound\_to 603

12.9375 -1.2399 -22.5608 H 0 0 0 0 0 0 0 0 0 0 0 0 # atno 616 bound\_to 603

17.2348 -13.8258 -27.5033 H 0 0 0 0 0 0 0 0 0 0 0 0 # atno 841 bound\_to 836

25.2801 -6.4188 -34.4753 H 0 0 0 0 0 0 0 0 0 0 0 0 # atno 876 bound\_to 867

18.0626 -14.1340 -28.8421 LP 0 0 0 0 0 0 0 0 0 0 0 0 # atno 987 bound\_to 836

16.4440 -14.3463 -28.7981 LP 0 0 0 0 0 0 0 0 0 0 0 0 # atno 988 bound\_to 836

21.1826 -1.4782 -30.9054 LP 0 0 0 0 0 0 0 0 0 0 0 0 # atno 998 bound\_to 163

21.2442 -0.1359 -29.9775 LP 0 0 0 0 0 0 0 0 0 0 0 0 0 # atno 999 bound\_to 163

24.2442 -5.2561 -34.0890 LP 0 0 0 0 0 0 0 0 0 0 0 0 # atno 1000 bound\_to 867

23.7182 -6.6480 -34.7618 LP 0 0 0 0 0 0 0 0 0 0 0 0 # atno 1001 bound\_to 867

><Gold.Score>

| Score | S(PLP) | S(hbond) | S(cho) | S(metal) | DE(clash) | DE(tors) | intcor |
|-------|--------|----------|--------|----------|-----------|----------|--------|
| 59.03 | -49.16 | 3.95     | 0.00   | 0.00     | 0.00      | 1.06     | 0.14   |

><Gold.PLP.Fitness>

59.0256

><Gold.PLP.PLP>

-49.1628

><Gold.PLP.part.hbond>

-3.0000

><Gold.PLP.part.metal>

0.0000

><Gold.PLP.part.buried>

-7.5353

> <Gold.PLP.part.nonpolar>

-41.4689

> <Gold.PLP.part.repulsive>

0.8701

> <Gold.PLP.ligand.clash>

0.0000

> <Gold.PLP.ligand.torsion>

1.0634

> <Gold.PLP.Chemscore.Hbond>

3.9500

> <Gold.PLP.Chemscore.CHOScore>

0.0000

> <Gold.PLP.Chemscore.Metal>

0.0000

><Gold.Chemscore.Hbonds>

donor molecule, donor type, donor heavy atom, donor atom, acceptor molecule, acceptor atom, score

L1 H 36 59 P1 163 0.95

L1 H 46 65 P1 261 2.00

P1 H 532 541 L1 18 1.00

><Gold.PLP.Chemscore.Internal.Correction>

0.1396

# Name: \*\*\*\*\*

# Creating user name zb1

# Creation time: Thu Jun 13 10:31:15 2019

# File generated by GOLD software.

#

@<TRIPOS>MOLECULE

\*\*\*\*\*|pRh-6|mol2|1|dock7

85 91 1

SMALL

USER\_CHARGES

@<TRIPOS>ATOM

|       |         |         |          |       |       |        |
|-------|---------|---------|----------|-------|-------|--------|
| 1 Cr  | 17.9568 | -8.5540 | -35.1891 | Cr.oh | 1 <1> | 0.0000 |
| 2 C   | 19.5194 | -6.2523 | -34.4602 | C.2   | 1 <1> | 0.0000 |
| 3 C   | 20.4598 | -5.4382 | -33.6440 | C.3   | 1 <1> | 0.0000 |
| 4 C   | 15.7976 | -6.6679 | -35.0623 | C.2   | 1 <1> | 0.0000 |
| 5 C   | 14.5186 | -6.1054 | -34.5397 | C.3   | 1 <1> | 0.0000 |
| 6 H   | 21.1412 | -5.1715 | -34.1597 | H     | 1 <1> | 0.0000 |
| 7 H   | 20.6635 | -5.7720 | -32.9464 | H     | 1 <1> | 0.0000 |
| 8 H   | 20.1357 | -4.5449 | -33.4557 | H     | 1 <1> | 0.0000 |
| 9 H   | 14.6007 | -5.9559 | -33.4307 | H     | 1 <1> | 0.0000 |
| 10 H  | 14.0468 | -6.8397 | -33.8347 | H     | 1 <1> | 0.0000 |
| 11 O  | 19.1413 | -7.3796 | -34.0322 | O.co2 | 1 <1> | 0.0000 |
| 12 O  | 16.8172 | -9.6493 | -36.4643 | O.co2 | 1 <1> | 0.0000 |
| 13 O  | 16.2907 | -7.6795 | -34.4834 | O.co2 | 1 <1> | 0.0000 |
| 14 O  | 19.6296 | -9.3186 | -35.9776 | O.co2 | 1 <1> | 0.0000 |
| 15 Cr | 18.0015 | -6.8748 | -36.8498 | Cr.oh | 1 <1> | 0.0000 |
| 16 O  | 19.1411 | -5.7796 | -35.5746 | O.co2 | 1 <1> | 0.0000 |
| 17 C  | 16.4389 | -9.1766 | -37.5787 | C.2   | 1 <1> | 0.0000 |
| 18 O  | 16.3286 | -6.1103 | -36.0612 | O.co2 | 1 <1> | 0.0000 |
| 19 C  | 20.1607 | -8.7609 | -36.9766 | C.2   | 1 <1> | 0.0000 |
| 20 O  | 16.8170 | -8.0492 | -38.0067 | O.co2 | 1 <1> | 0.0000 |

|      |                                |       |        |
|------|--------------------------------|-------|--------|
| 21 O | 19.6675 -7.7494 -37.5555 O.co2 | 1 <1> | 0.0000 |
| 22 C | 15.4985 -9.9907 -38.3949 C.3   | 1 <1> | 0.0000 |
| 23 C | 21.4396 -9.3234 -37.4992 C.3   | 1 <1> | 0.0000 |
| 24 H | 14.8170 -10.2574 -37.8792 H    | 1 <1> | 0.0000 |
| 25 H | 15.2947 -9.6569 -39.0924 H     | 1 <1> | 0.0000 |
| 26 H | 15.8226 -10.8840 -38.5832 H    | 1 <1> | 0.0000 |
| 27 H | 21.9944 -8.6583 -37.7171 H     | 1 <1> | 0.0000 |
| 28 H | 21.7698 -9.9450 -36.9911 H     | 1 <1> | 0.0000 |
| 29 H | 21.2518 -9.5733 -38.2763 H     | 1 <1> | 0.0000 |
| 30 C | 11.9055 -4.2658 -31.5352 C.3   | 1 <1> | 0.0000 |
| 31 C | 12.0473 -4.9124 -32.9198 C.3   | 1 <1> | 0.0000 |
| 32 N | 11.2370 -4.1699 -33.9771 N.4   | 1 <1> | 0.0000 |
| 33 C | 11.2626 -2.6427 -33.9034 C.3   | 1 <1> | 0.0000 |
| 34 C | 11.1426 -2.1332 -32.4600 C.3   | 1 <1> | 0.0000 |
| 35 N | 12.2541 -2.8415 -31.7790 N.pl3 | 1 <1> | 0.0000 |
| 36 N | 19.2090 -0.3332 -32.1247 N.pl3 | 1 <1> | 0.0000 |
| 37 C | 16.0474 -1.4156 -31.3445 C.ar  | 1 <1> | 0.0000 |
| 38 C | 15.2539 -1.6630 -30.2877 C.ar  | 1 <1> | 0.0000 |
| 39 C | 13.9952 -2.1080 -30.4377 C.ar  | 1 <1> | 0.0000 |
| 40 C | 13.4342 -2.3523 -31.6422 C.ar  | 1 <1> | 0.0000 |
| 41 C | 14.2485 -2.0693 -32.6852 C.ar  | 1 <1> | 0.0000 |
| 42 C | 15.5101 -1.6099 -32.5619 C.ar  | 1 <1> | 0.0000 |

|      |         |         |          |       |       |        |
|------|---------|---------|----------|-------|-------|--------|
| 43 C | 16.2673 | -1.3481 | -33.6434 | C.ar  | 1 <1> | 0.0000 |
| 44 C | 17.5228 | -0.9091 | -33.4859 | C.ar  | 1 <1> | 0.0000 |
| 45 C | 18.0147 | -0.7465 | -32.2459 | C.ar  | 1 <1> | 0.0000 |
| 46 N | 17.2829 | -1.0012 | -31.1931 | N.pl3 | 1 <1> | 0.0000 |
| 47 C | 11.5166 | -4.5753 | -35.4117 | C.3   | 1 <1> | 0.0000 |
| 48 C | 13.3028 | -5.1223 | -35.4546 | C.3   | 1 <1> | 0.0000 |
| 49 H | 12.4958 | -4.7788 | -30.7490 | H     | 1 <1> | 0.0000 |
| 50 H | 10.8543 | -4.3604 | -31.1776 | H     | 1 <1> | 0.0000 |
| 51 H | 11.7103 | -5.9742 | -32.8718 | H     | 1 <1> | 0.0000 |
| 52 H | 13.1350 | -4.8752 | -33.1464 | H     | 1 <1> | 0.0000 |
| 53 H | 10.2399 | -4.4344 | -33.7901 | H     | 1 <1> | 0.0000 |
| 54 H | 10.4170 | -2.2371 | -34.5082 | H     | 1 <1> | 0.0000 |
| 55 H | 12.2186 | -2.2554 | -34.3275 | H     | 1 <1> | 0.0000 |
| 56 H | 11.1467 | -1.0281 | -32.3882 | H     | 1 <1> | 0.0000 |
| 57 H | 10.1587 | -2.4296 | -32.0281 | H     | 1 <1> | 0.0000 |
| 58 H | 19.8017 | -0.1223 | -32.9665 | H     | 1 <1> | 0.0000 |
| 59 H | 19.6252 | -0.2008 | -31.1685 | H     | 1 <1> | 0.0000 |
| 60 H | 15.6451 | -1.5190 | -29.2664 | H     | 1 <1> | 0.0000 |
| 61 H | 13.4651 | -2.3024 | -29.4922 | H     | 1 <1> | 0.0000 |
| 62 H | 13.9111 | -2.2236 | -33.7206 | H     | 1 <1> | 0.0000 |
| 63 H | 15.8761 | -1.4809 | -34.6663 | H     | 1 <1> | 0.0000 |
| 64 H | 18.1354 | -0.6847 | -34.3763 | H     | 1 <1> | 0.0000 |



|         |                              |       |        |
|---------|------------------------------|-------|--------|
| 65 H    | 17.6809 -0.8667 -30.2536 H   | 1 <1> | 0.0000 |
| 66 H    | 11.4868 -3.6984 -36.1032 H   | 1 <1> | 0.0000 |
| 67 H    | 10.9723 -5.4016 -35.9339 H   | 1 <1> | 0.0000 |
| 68 H    | 13.5718 -5.2895 -36.5247 H   | 1 <1> | 0.0000 |
| 69 H    | 13.7675 -4.1262 -35.2239 H   | 1 <1> | 0.0000 |
| 70 **** | 18.5180 -7.9387 -34.5790 LP  | 1 <1> | 0.0000 |
| 71 **** | 19.4654 -7.7127 -33.1467 LP  | 1 <1> | 0.0000 |
| 72 **** | 17.4404 -9.1247 -35.8843 LP  | 1 <1> | 0.0000 |
| 73 **** | 16.4922 -10.5466 -36.1655 LP | 1 <1> | 0.0000 |
| 74 **** | 17.1459 -8.0779 -34.8150 LP  | 1 <1> | 0.0000 |
| 75 **** | 15.8253 -8.0804 -33.6943 LP  | 1 <1> | 0.0000 |
| 76 **** | 18.7734 -8.9630 -35.6030 LP  | 1 <1> | 0.0000 |
| 77 **** | 20.0649 -10.1164 -35.5603 LP | 1 <1> | 0.0000 |
| 78 **** | 18.5178 -6.3042 -36.1545 LP  | 1 <1> | 0.0000 |
| 79 **** | 19.4661 -4.8823 -35.8733 LP  | 1 <1> | 0.0000 |
| 80 **** | 17.1849 -6.4659 -36.4359 LP  | 1 <1> | 0.0000 |
| 81 **** | 15.8934 -5.3125 -36.4786 LP  | 1 <1> | 0.0000 |
| 82 **** | 17.4402 -7.4902 -37.4599 LP  | 1 <1> | 0.0000 |
| 83 **** | 16.4929 -7.7162 -38.8922 LP  | 1 <1> | 0.0000 |
| 84 **** | 18.8123 -7.3510 -37.2239 LP  | 1 <1> | 0.0000 |
| 85 **** | 20.1330 -7.3485 -38.3445 LP  | 1 <1> | 0.0000 |

@<TRIPOS>BOND

- 1 1 11 ar
- 2 1 12 ar
- 3 1 13 ar
- 4 1 14 ar
- 5 1 15 1
- 6 2 3 1
- 7 2 11 ar
- 8 2 16 ar
- 9 3 6 1
- 10 3 7 1
- 11 3 8 1
- 12 4 5 1
- 13 4 13 ar
- 14 4 18 ar
- 15 5 9 1
- 16 5 10 1
- 17 5 48 1
- 18 12 17 ar
- 19 14 19 ar
- 20 15 16 ar
- 21 15 18 ar
- 22 15 20 ar

23 15 21 ar

24 17 20 ar

25 17 22 1

26 19 21 ar

27 19 23 1

28 22 24 1

29 22 25 1

30 22 26 1

31 23 27 1

32 23 28 1

33 23 29 1

34 30 31 1

35 30 35 1

36 30 49 1

37 30 50 1

38 31 32 1

39 31 51 1

40 31 52 1

41 32 33 1

42 32 47 1

43 32 53 1

44 33 34 1

45 33 54 1  
46 33 55 1  
47 34 35 1  
48 34 56 1  
49 34 57 1  
50 35 40 1  
51 36 45 1  
52 36 58 1  
53 36 59 1  
54 37 38 ar  
55 37 42 ar  
56 37 46 ar  
57 38 39 ar  
58 38 60 1  
59 39 40 ar  
60 39 61 1  
61 40 41 ar  
62 41 42 ar  
63 41 62 1  
64 42 43 ar  
65 43 44 ar  
66 43 63 1

67 44 45 ar

68 44 64 1

69 45 46 ar

70 46 65 1

71 47 48 1

72 47 66 1

73 47 67 1

74 48 68 1

75 48 69 1

76 11 70 1

77 11 71 1

78 12 72 1

79 12 73 1

80 13 74 1

81 13 75 1

82 14 76 1

83 14 77 1

84 16 78 1

85 16 79 1

86 18 80 1

87 18 81 1

88 20 82 1

89 20 83 1

90 21 84 1

91 21 85 1

@<TRIPOS>SUBSTRUCTURE

1 \*\*\*\* 1

@<TRIPOS>SET

LONE\_PAIRS STATIC ATOMS <user> \*\*\*\* ""

16 70 71 72 73 74 75 76 77 78 79 80 81 82 83 84 85

DONOR\_HYDROGENS STATIC ATOMS <user> \*\*\*\* ""

4 53 58 59 65

ATOM\$BLUE STATIC ATOMS COLORGROUP SYSTEM

16 70 71 72 73 74 75 76 77 78 79 80 81 82 83 84 85

ATOM\$RED STATIC ATOMS COLORGROUP SYSTEM

4 53 58 59 65

@<TRIPOS>COMMENT

> <Gold.Version>

5.7.2

> <Gold.Id.Protein>

unknown|gold\_protein|mol2

> <Gold.Protein.RotatedTorsions>

[ 614 603 602 601 ] final 14.03 input 2.31 | X-H torsion  
[ 841 836 835 832 ] final 176.02 input 27.02 | X-H torsion  
[ 172 163 162 160 ] final -114.09 input 178.05 | X-H torsion  
[ 876 867 866 864 ] final -21.97 input 173.38 | X-H torsion

><Gold.Protein.ActiveResidues>

TYR19 ILE22 HIS23 ASP25 ASP26 HIS41 GLY42 GLU43 TRP44 LYS46  
PHE57 PRO59 SER60 ASN61 TYR62

><Gold.Protein.RotatedAtoms>

20.4236 -1.7353 -29.9010 H 0 0 0 0 0 0 0 0 0 0 0 0 # atno 172 bound\_to 163  
12.7953 -1.1558 -22.4939 H 0 0 0 0 0 0 0 0 0 0 0 0 # atno 614 bound\_to 603  
12.9783 0.5251 -22.3362 H 0 0 0 0 0 0 0 0 0 0 0 0 # atno 615 bound\_to 603  
14.2511 -0.4162 -22.9517 H 0 0 0 0 0 0 0 0 0 0 0 0 # atno 616 bound\_to 603  
16.3529 -14.2317 -28.5052 H 0 0 0 0 0 0 0 0 0 0 0 0 # atno 841 bound\_to 836  
23.9486 -6.8197 -34.7717 H 0 0 0 0 0 0 0 0 0 0 0 0 # atno 876 bound\_to 867  
17.5612 -13.8322 -27.5289 LP 0 0 0 0 0 0 0 0 0 0 0 0 # atno 987 bound\_to 836  
17.8481 -14.2328 -29.0858 LP 0 0 0 0 0 0 0 0 0 0 0 0 # atno 988 bound\_to 836  
21.4316 -1.0218 -30.9255 LP 0 0 0 0 0 0 0 0 0 0 0 0 # atno 998 bound\_to 163  
20.9213 -0.2431 -29.5838 LP 0 0 0 0 0 0 0 0 0 0 0 0 # atno 999 bound\_to 163  
25.3593 -6.1538 -34.3965 LP 0 0 0 0 0 0 0 0 0 0 0 0 # atno 1000 bound\_to 867  
23.9648 -5.3403 -34.1512 LP 0 0 0 0 0 0 0 0 0 0 0 0 # atno 1001 bound\_to 867

> <Gold.Score>

| Score | S(PLP) | S(hbond) | S(cho) | S(metal) | DE(clash) | DE(tors) | intcor |
|-------|--------|----------|--------|----------|-----------|----------|--------|
| 55.70 | -47.76 | 4.12     | 0.00   | 0.00     | 0.00      | 2.28     | 0.14   |

> <Gold.PLP.Fitness>

55.7000

> <Gold.PLP.PLP>

-47.7624

> <Gold.PLP.part.hbond>

-4.0000

> <Gold.PLP.part.metal>

0.0000

> <Gold.PLP.part.buried>

-2.3435

> <Gold.PLP.part.nonpolar>

-42.1360



> <Gold.PLP.part.repulsive>

0.1127

> <Gold.PLP.ligand.clash>

0.0000

> <Gold.PLP.ligand.torsion>

2.2799

> <Gold.PLP.Chemscore.Hbond>

4.1193

> <Gold.PLP.Chemscore.CHOScore>

0.0000

> <Gold.PLP.Chemscore.Metal>

0.0000

> <Gold.Chemscore.Hbonds>

donor molecule, donor type, donor heavy atom, donor atom, acceptor molecule, acceptor atom, score

L1 H 36 59 P1 261 1.66

L1 H 46 65 P1 261 1.98

P1 H 557 566 L1 13 0.47

><Gold.PLP.Chemscore.Internal.Correction>

0.1396

# Name: \*\*\*\*\*

# Creating user name zbl

# Creation time: Thu Jun 13 10:31:17 2019

# File generated by GOLD software.

#

@<TRIPOS>MOLECULE

\*\*\*\*\*|pRh-6|mol2|1|dock8

85 91 1

SMALL

USER\_CHARGES

@<TRIPOS>ATOM

1 Cr 20.9625 -0.7128 -33.5525 Cr.oh 1 <1> 0.0000

S178

|       |         |         |          |       |       |        |
|-------|---------|---------|----------|-------|-------|--------|
| 2 C   | 19.7011 | 0.9419  | -35.5379 | C.2   | 1 <1> | 0.0000 |
| 3 C   | 19.4130 | 2.1854  | -36.3021 | C.3   | 1 <1> | 0.0000 |
| 4 C   | 18.2493 | -1.1478 | -32.7250 | C.2   | 1 <1> | 0.0000 |
| 5 C   | 17.0946 | -1.0919 | -31.7822 | C.3   | 1 <1> | 0.0000 |
| 6 H   | 19.5526 | 2.0338  | -37.1733 | H     | 1 <1> | 0.0000 |
| 7 H   | 19.7600 | 2.8418  | -36.0050 | H     | 1 <1> | 0.0000 |
| 8 H   | 18.4671 | 2.3726  | -36.3948 | H     | 1 <1> | 0.0000 |
| 9 H   | 17.1016 | -0.1100 | -31.2393 | H     | 1 <1> | 0.0000 |
| 10 H  | 17.4742 | -1.0325 | -30.7281 | H     | 1 <1> | 0.0000 |
| 11 O  | 20.4627 | 0.9942  | -34.5308 | O.co2 | 1 <1> | 0.0000 |
| 12 O  | 21.4235 | -2.4959 | -32.6965 | O.co2 | 1 <1> | 0.0000 |
| 13 O  | 19.3341 | -0.5943 | -32.3809 | O.co2 | 1 <1> | 0.0000 |
| 14 O  | 22.5043 | -0.8854 | -34.8165 | O.co2 | 1 <1> | 0.0000 |
| 15 Cr | 19.6340 | -1.9207 | -35.0872 | Cr.oh | 1 <1> | 0.0000 |
| 16 O  | 19.1730 | -0.1376 | -35.9432 | O.co2 | 1 <1> | 0.0000 |
| 17 C  | 20.8954 | -3.5754 | -33.1018 | C.2   | 1 <1> | 0.0000 |
| 18 O  | 18.0922 | -1.7481 | -33.8231 | O.co2 | 1 <1> | 0.0000 |
| 19 C  | 22.3473 | -1.4857 | -35.9147 | C.2   | 1 <1> | 0.0000 |
| 20 O  | 20.1339 | -3.6277 | -34.1089 | O.co2 | 1 <1> | 0.0000 |
| 21 O  | 21.2625 | -2.0392 | -36.2588 | O.co2 | 1 <1> | 0.0000 |
| 22 C  | 21.1835 | -4.8188 | -32.3376 | C.3   | 1 <1> | 0.0000 |
| 23 C  | 23.5019 | -1.5416 | -36.8575 | C.3   | 1 <1> | 0.0000 |

|      |         |         |                |       |        |
|------|---------|---------|----------------|-------|--------|
| 24 H | 21.0439 | -4.6673 | -31.4664 H     | 1 <1> | 0.0000 |
| 25 H | 20.8366 | -5.4752 | -32.6347 H     | 1 <1> | 0.0000 |
| 26 H | 22.1295 | -5.0060 | -32.2449 H     | 1 <1> | 0.0000 |
| 27 H | 23.2152 | -1.4095 | -37.6929 H     | 1 <1> | 0.0000 |
| 28 H | 24.1725 | -1.0531 | -36.6023 H     | 1 <1> | 0.0000 |
| 29 H | 23.6731 | -2.3588 | -36.9244 H     | 1 <1> | 0.0000 |
| 30 C | 11.2051 | -0.1303 | -29.6900 C.3   | 1 <1> | 0.0000 |
| 31 C | 11.8120 | -1.3844 | -30.3334 C.3   | 1 <1> | 0.0000 |
| 32 N | 13.3176 | -1.2460 | -30.5335 N.4   | 1 <1> | 0.0000 |
| 33 C | 14.0962 | -0.5881 | -29.3936 C.3   | 1 <1> | 0.0000 |
| 34 C | 13.3617 | 0.6340  | -28.8239 C.3   | 1 <1> | 0.0000 |
| 35 N | 12.0342 | 0.0724  | -28.4730 N.pl3 | 1 <1> | 0.0000 |
| 36 N | 9.2825  | -2.8512 | -22.2551 N.pl3 | 1 <1> | 0.0000 |
| 37 C | 11.0284 | -1.3004 | -24.7697 C.ar  | 1 <1> | 0.0000 |
| 38 C | 12.1275 | -0.5549 | -24.9788 C.ar  | 1 <1> | 0.0000 |
| 39 C | 12.4686 | -0.1271 | -26.2058 C.ar  | 1 <1> | 0.0000 |
| 40 C | 11.7414 | -0.3948 | -27.3125 C.ar  | 1 <1> | 0.0000 |
| 41 C | 10.6569 | -1.1677 | -27.0730 C.ar  | 1 <1> | 0.0000 |
| 42 C | 10.3001 | -1.6203 | -25.8540 C.ar  | 1 <1> | 0.0000 |
| 43 C | 9.2067  | -2.3868 | -25.6856 C.ar  | 1 <1> | 0.0000 |
| 44 C | 8.8705  | -2.8057 | -24.4587 C.ar  | 1 <1> | 0.0000 |
| 45 C | 9.6257  | -2.4441 | -23.4076 C.ar  | 1 <1> | 0.0000 |

|      |         |         |          |       |       |        |
|------|---------|---------|----------|-------|-------|--------|
| 46 N | 10.6875 | -1.6984 | -23.5670 | N.p13 | 1 <1> | 0.0000 |
| 47 C | 14.0407 | -2.5220 | -30.9205 | C.3   | 1 <1> | 0.0000 |
| 48 C | 15.5272 | -1.9900 | -31.9198 | C.3   | 1 <1> | 0.0000 |
| 49 H | 10.1120 | -0.2094 | -29.5209 | H     | 1 <1> | 0.0000 |
| 50 H | 11.3012 | 0.7368  | -30.3833 | H     | 1 <1> | 0.0000 |
| 51 H | 11.3227 | -1.5728 | -31.3174 | H     | 1 <1> | 0.0000 |
| 52 H | 11.5735 | -2.2135 | -29.6324 | H     | 1 <1> | 0.0000 |
| 53 H | 13.4244 | -0.5939 | -31.3474 | H     | 1 <1> | 0.0000 |
| 54 H | 15.0964 | -0.2718 | -29.7741 | H     | 1 <1> | 0.0000 |
| 55 H | 14.2479 | -1.3172 | -28.5634 | H     | 1 <1> | 0.0000 |
| 56 H | 13.9172 | 1.1312  | -28.0050 | H     | 1 <1> | 0.0000 |
| 57 H | 13.2654 | 1.4233  | -29.6050 | H     | 1 <1> | 0.0000 |
| 58 H | 8.4326  | -3.4545 | -22.1200 | H     | 1 <1> | 0.0000 |
| 59 H | 9.8491  | -2.5814 | -21.4117 | H     | 1 <1> | 0.0000 |
| 60 H | 12.7608 | -0.2650 | -24.1233 | H     | 1 <1> | 0.0000 |
| 61 H | 13.3719 | 0.5021  | -26.2341 | H     | 1 <1> | 0.0000 |
| 62 H | 9.9814  | -1.4586 | -27.8907 | H     | 1 <1> | 0.0000 |
| 63 H | 8.5768  | -2.6874 | -26.5399 | H     | 1 <1> | 0.0000 |
| 64 H | 7.9794  | -3.4439 | -24.3278 | H     | 1 <1> | 0.0000 |
| 65 H | 11.2516 | -1.4364 | -22.7470 | H     | 1 <1> | 0.0000 |
| 66 H | 13.4417 | -3.1369 | -31.6354 | H     | 1 <1> | 0.0000 |
| 67 H | 14.4646 | -3.2387 | -30.1733 | H     | 1 <1> | 0.0000 |

|         |         |         |             |       |        |
|---------|---------|---------|-------------|-------|--------|
| 68 H    | 15.7493 | -2.8094 | -32.6441 H  | 1 <1> | 0.0000 |
| 69 H    | 15.0112 | -1.2187 | -32.5523 H  | 1 <1> | 0.0000 |
| 70 **** | 20.6709 | 0.1616  | -34.0175 LP | 1 <1> | 0.0000 |
| 71 **** | 20.8571 | 1.8682  | -34.2470 LP | 1 <1> | 0.0000 |
| 72 **** | 21.2431 | -1.6389 | -33.1793 LP | 1 <1> | 0.0000 |
| 73 **** | 22.0203 | -2.5016 | -31.8941 LP | 1 <1> | 0.0000 |
| 74 **** | 20.1243 | -0.6192 | -32.9931 LP | 1 <1> | 0.0000 |
| 75 **** | 19.4010 | -0.1320 | -31.4967 LP | 1 <1> | 0.0000 |
| 76 **** | 21.7479 | -0.8291 | -34.1649 LP | 1 <1> | 0.0000 |
| 77 **** | 23.3852 | -0.4659 | -34.5975 LP | 1 <1> | 0.0000 |
| 78 **** | 19.3535 | -0.9946 | -35.4604 LP | 1 <1> | 0.0000 |
| 79 **** | 18.5762 | -0.1319 | -36.7456 LP | 1 <1> | 0.0000 |
| 80 **** | 18.8487 | -1.8044 | -34.4748 LP | 1 <1> | 0.0000 |
| 81 **** | 17.2113 | -2.1676 | -34.0422 LP | 1 <1> | 0.0000 |
| 82 **** | 19.9257 | -2.7951 | -34.6222 LP | 1 <1> | 0.0000 |
| 83 **** | 19.7394 | -4.5017 | -34.3927 LP | 1 <1> | 0.0000 |
| 84 **** | 20.4722 | -2.0143 | -35.6466 LP | 1 <1> | 0.0000 |
| 85 **** | 21.1955 | -2.5015 | -37.1430 LP | 1 <1> | 0.0000 |

@<TRIPOS>BOND

1 1 11 ar

2 1 12 ar

3 1 13 ar

4 1 14 ar  
5 1 15 1  
6 2 3 1  
7 2 11 ar  
8 2 16 ar  
9 3 6 1  
10 3 7 1  
11 3 8 1  
12 4 5 1  
13 4 13 ar  
14 4 18 ar  
15 5 9 1  
16 5 10 1  
17 5 48 1  
18 12 17 ar  
19 14 19 ar  
20 15 16 ar  
21 15 18 ar  
22 15 20 ar  
23 15 21 ar  
24 17 20 ar  
25 17 22 1

26 19 21 ar

27 19 23 1

28 22 24 1

29 22 25 1

30 22 26 1

31 23 27 1

32 23 28 1

33 23 29 1

34 30 31 1

35 30 35 1

36 30 49 1

37 30 50 1

38 31 32 1

39 31 51 1

40 31 52 1

41 32 33 1

42 32 47 1

43 32 53 1

44 33 34 1

45 33 54 1

46 33 55 1

47 34 35 1



48 34 56 1  
49 34 57 1  
50 35 40 1  
51 36 45 1  
52 36 58 1  
53 36 59 1  
54 37 38 ar  
55 37 42 ar  
56 37 46 ar  
57 38 39 ar  
58 38 60 1  
59 39 40 ar  
60 39 61 1  
61 40 41 ar  
62 41 42 ar  
63 41 62 1  
64 42 43 ar  
65 43 44 ar  
66 43 63 1  
67 44 45 ar  
68 44 64 1  
69 45 46 ar

70 46 65 1

71 47 48 1

72 47 66 1

73 47 67 1

74 48 68 1

75 48 69 1

76 11 70 1

77 11 71 1

78 12 72 1

79 12 73 1

80 13 74 1

81 13 75 1

82 14 76 1

83 14 77 1

84 16 78 1

85 16 79 1

86 18 80 1

87 18 81 1

88 20 82 1

89 20 83 1

90 21 84 1

91 21 85 1

@<TRIPOS>SUBSTRUCTURE

1 \*\*\*\* 1

@<TRIPOS>SET

LONE\_PAIRS STATIC ATOMS <user> \*\*\*\* ""

16 70 71 72 73 74 75 76 77 78 79 80 81 82 83 84 85

DONOR\_HYDROGENS STATIC ATOMS <user> \*\*\*\* ""

4 53 58 59 65

ATOM\$BLUE STATIC ATOMS COLORGROUP SYSTEM

16 70 71 72 73 74 75 76 77 78 79 80 81 82 83 84 85

ATOM\$RED STATIC ATOMS COLORGROUP SYSTEM

4 53 58 59 65

@<TRIPOS>COMMENT

><Gold.Version>

5.7.2

><Gold.Id.Protein>

unknown|gold\_protein|mol2

><Gold.Protein.RotatedTorsions>

[ 614 603 602 601 ] final -161.52 input 2.31 | X-H torsion

[ 841 836 835 832 ] final 119.87 input 27.02 | X-H torsion

[ 172 163 162 160 ] final 161.69 input 178.05 | X-H torsion

S187

[ 876 867 866 864 ] final -98.25 input 173.38 | X-H torsion

><Gold.Protein.ActiveResidues>

TYR19 ILE22 HIS23 ASP25 ASP26 HIS41 GLY42 GLU43 TRP44 LYS46

PHE57 PRO59 SER60 ASN61 TYR62

><Gold.Protein.RotatedAtoms>

21.1751 -1.5224 -30.8451 H 0 0 0 0 0 0 0 0 0 0 0 0 # atno 172 bound\_to 163  
13.9441 0.4144 -22.7206 H 0 0 0 0 0 0 0 0 0 0 0 0 # atno 614 bound\_to 603  
13.6390 -1.2526 -22.8299 H 0 0 0 0 0 0 0 0 0 0 0 0 # atno 615 bound\_to 603  
12.4432 -0.2053 -22.2315 H 0 0 0 0 0 0 0 0 0 0 0 0 # atno 616 bound\_to 603  
16.6141 -13.9756 -27.7279 H 0 0 0 0 0 0 0 0 0 0 0 0 # atno 841 bound\_to 836  
25.0647 -6.7294 -34.6340 H 0 0 0 0 0 0 0 0 0 0 0 0 # atno 876 bound\_to 867  
18.1525 -13.9343 -28.1799 LP 0 0 0 0 0 0 0 0 0 0 0 0 # atno 987 bound\_to 836  
16.9894 -14.3929 -29.2304 LP 0 0 0 0 0 0 0 0 0 0 0 0 # atno 988 bound\_to 836  
21.2801 -0.1415 -30.0346 LP 0 0 0 0 0 0 0 0 0 0 0 0 # atno 998 bound\_to 163  
20.3045 -1.3411 -29.5094 LP 0 0 0 0 0 0 0 0 0 0 0 0 # atno 999 bound\_to 163  
24.6648 -5.2836 -34.0648 LP 0 0 0 0 0 0 0 0 0 0 0 0 # atno 1000 bound\_to 867  
23.5180 -6.3030 -34.6237 LP 0 0 0 0 0 0 0 0 0 0 0 0 # atno 1001 bound\_to 867

><Gold.Score>

| Score | S(PLP) | S(hbond) | S(cho) | S(metal) | DE(clash) | DE(tors) | intcor |
|-------|--------|----------|--------|----------|-----------|----------|--------|
|-------|--------|----------|--------|----------|-----------|----------|--------|

S188

64.65 -62.48 0.99 0.00 0.00 0.00 0.47 0.13

><Gold.PLP.Fitness>

64.6503

><Gold.PLP.PLP>

-62.4818

><Gold.PLP.part.hbond>

-3.0000

><Gold.PLP.part.metal>

0.0000

><Gold.PLP.part.buried>

-5.0770

><Gold.PLP.part.nonpolar>

-55.8530

><Gold.PLP.part.repulsive>

0.3092

> <Gold.PLP.ligand.clash>

0.0000

> <Gold.PLP.ligand.torsion>

0.4658

> <Gold.PLP.Chemscore.Hbond>

0.9913

> <Gold.PLP.Chemscore.CHOScore>

0.0000

> <Gold.PLP.Chemscore.Metal>

0.0000

> <Gold.Chemscore.Hbonds>

donor molecule, donor type, donor heavy atom, donor atom, acceptor molecule, acceptor atom, score

P1 H 163 172 L1 12 0.99

> <Gold.PLP.Chemscore.Internal.Correction>

0.1263

# Name: \*\*\*\*\*  
# Creating user name zbl  
# Creation time: Thu Jun 13 10:31:21 2019

# File generated by GOLD software.

#

@<TRIPOS>MOLECULE

\*\*\*\*\*|pRh-6|mol2|1|dock9

85 91 1

SMALL

USER\_CHARGES

@<TRIPOS>ATOM

|      |         |         |          |       |       |        |
|------|---------|---------|----------|-------|-------|--------|
| 1 Cr | 19.6967 | -2.1118 | -35.1775 | Cr.oh | 1 <1> | 0.0000 |
| 2 C  | 20.5016 | -3.6612 | -32.8922 | C.2   | 1 <1> | 0.0000 |
| 3 C  | 21.1993 | -4.7452 | -32.1496 | C.3   | 1 <1> | 0.0000 |
| 4 C  | 17.0685 | -2.8186 | -34.2673 | C.2   | 1 <1> | 0.0000 |
| 5 C  | 15.7256 | -3.4599 | -34.3704 | C.3   | 1 <1> | 0.0000 |
| 6 H  | 21.7148 | -4.3814 | -31.5145 | H     | 1 <1> | 0.0000 |

S191

|       |         |         |                |       |        |
|-------|---------|---------|----------------|-------|--------|
| 7 H   | 21.5564 | -5.2869 | -32.6171 H     | 1 <1> | 0.0000 |
| 8 H   | 20.6250 | -5.2248 | -31.5343 H     | 1 <1> | 0.0000 |
| 9 H   | 15.8225 | -4.4505 | -34.8884 H     | 1 <1> | 0.0000 |
| 10 H  | 15.4413 | -3.5621 | -35.4510 H     | 1 <1> | 0.0000 |
| 11 O  | 20.5389 | -3.6501 | -34.1554 O.co2 | 1 <1> | 0.0000 |
| 12 O  | 18.8618 | -0.4923 | -36.0746 O.co2 | 1 <1> | 0.0000 |
| 13 O  | 17.9044 | -3.0206 | -35.1957 O.co2 | 1 <1> | 0.0000 |
| 14 O  | 21.4535 | -1.1645 | -35.0318 O.co2 | 1 <1> | 0.0000 |
| 15 Cr | 19.0656 | -1.1530 | -33.1130 Cr.oh | 1 <1> | 0.0000 |
| 16 O  | 19.9006 | -2.7725 | -32.2160 O.co2 | 1 <1> | 0.0000 |
| 17 C  | 18.2607 | 0.3965  | -35.3983 C.2   | 1 <1> | 0.0000 |
| 18 O  | 17.3089 | -2.1002 | -33.2588 O.co2 | 1 <1> | 0.0000 |
| 19 C  | 21.6939 | -0.4462 | -34.0233 C.2   | 1 <1> | 0.0000 |
| 20 O  | 18.2234 | 0.3854  | -34.1351 O.co2 | 1 <1> | 0.0000 |
| 21 O  | 20.8579 | -0.2442 | -33.0949 O.co2 | 1 <1> | 0.0000 |
| 22 C  | 17.5630 | 1.4804  | -36.1409 C.3   | 1 <1> | 0.0000 |
| 23 C  | 23.0367 | 0.1952  | -33.9201 C.3   | 1 <1> | 0.0000 |
| 24 H  | 17.0476 | 1.1167  | -36.7761 H     | 1 <1> | 0.0000 |
| 25 H  | 17.2060 | 2.0222  | -35.6735 H     | 1 <1> | 0.0000 |
| 26 H  | 18.1373 | 1.9600  | -36.7562 H     | 1 <1> | 0.0000 |
| 27 H  | 23.3308 | 0.1445  | -33.0784 H     | 1 <1> | 0.0000 |
| 28 H  | 23.5887 | -0.0724 | -34.5342 H     | 1 <1> | 0.0000 |



|      |         |         |                |       |        |
|------|---------|---------|----------------|-------|--------|
| 29 H | 22.8736 | 1.0166  | -33.9337 H     | 1 <1> | 0.0000 |
| 30 C | 12.4191 | 0.1724  | -30.1749 C.3   | 1 <1> | 0.0000 |
| 31 C | 12.3753 | -1.1744 | -30.9092 C.3   | 1 <1> | 0.0000 |
| 32 N | 13.7592 | -1.8062 | -31.0167 N.4   | 1 <1> | 0.0000 |
| 33 C | 14.6499 | -1.7044 | -29.7778 C.3   | 1 <1> | 0.0000 |
| 34 C | 14.5750 | -0.3160 | -29.1265 C.3   | 1 <1> | 0.0000 |
| 35 N | 13.1182 | -0.1476 | -28.9027 N.pl3 | 1 <1> | 0.0000 |
| 36 N | 8.7580  | -2.2748 | -23.3129 N.pl3 | 1 <1> | 0.0000 |
| 37 C | 11.1523 | -1.0629 | -25.4518 C.ar  | 1 <1> | 0.0000 |
| 38 C | 12.3053 | -0.3714 | -25.4529 C.ar  | 1 <1> | 0.0000 |
| 39 C | 12.9628 | -0.0952 | -26.5914 C.ar  | 1 <1> | 0.0000 |
| 40 C | 12.5219 | -0.4717 | -27.8117 C.ar  | 1 <1> | 0.0000 |
| 41 C | 11.3740 | -1.1872 | -27.7748 C.ar  | 1 <1> | 0.0000 |
| 42 C | 10.7021 | -1.4887 | -26.6453 C.ar  | 1 <1> | 0.0000 |
| 43 C | 9.5637  | -2.2058 | -26.6797 C.ar  | 1 <1> | 0.0000 |
| 44 C | 8.9114  | -2.4733 | -25.5410 C.ar  | 1 <1> | 0.0000 |
| 45 C | 9.3980  | -2.0106 | -24.3770 C.ar  | 1 <1> | 0.0000 |
| 46 N | 10.5025 | -1.3123 | -24.3397 N.pl3 | 1 <1> | 0.0000 |
| 47 C | 13.7799 | -3.2462 | -31.4925 C.3   | 1 <1> | 0.0000 |
| 48 C | 14.2995 | -3.1895 | -33.2865 C.3   | 1 <1> | 0.0000 |
| 49 H | 11.4228 | 0.6480  | -30.0710 H     | 1 <1> | 0.0000 |
| 50 H | 13.0018 | 0.9116  | -30.7715 H     | 1 <1> | 0.0000 |

|         |         |         |             |       |        |
|---------|---------|---------|-------------|-------|--------|
| 51 H    | 11.9536 | -1.0285 | -31.9311 H  | 1 <1> | 0.0000 |
| 52 H    | 11.6884 | -1.8093 | -30.3084 H  | 1 <1> | 0.0000 |
| 53 H    | 14.2549 | -1.2499 | -31.7542 H  | 1 <1> | 0.0000 |
| 54 H    | 15.7051 | -1.9160 | -30.0725 H  | 1 <1> | 0.0000 |
| 55 H    | 14.3365 | -2.4588 | -29.0186 H  | 1 <1> | 0.0000 |
| 56 H    | 15.2238 | -0.2198 | -28.2342 H  | 1 <1> | 0.0000 |
| 57 H    | 14.9615 | 0.4592  | -29.8280 H  | 1 <1> | 0.0000 |
| 58 H    | 7.8717  | -2.8392 | -23.3347 H  | 1 <1> | 0.0000 |
| 59 H    | 9.1094  | -1.9228 | -22.3867 H  | 1 <1> | 0.0000 |
| 60 H    | 12.7191 | 0.0004  | -24.5003 H  | 1 <1> | 0.0000 |
| 61 H    | 13.8754 | 0.5060  | -26.4560 H  | 1 <1> | 0.0000 |
| 62 H    | 10.9099 | -1.5548 | -28.7016 H  | 1 <1> | 0.0000 |
| 63 H    | 9.1522  | -2.5882 | -27.6292 H  | 1 <1> | 0.0000 |
| 64 H    | 7.9845  | -3.0719 | -25.5738 H  | 1 <1> | 0.0000 |
| 65 H    | 10.8569 | -0.9708 | -23.4359 H  | 1 <1> | 0.0000 |
| 66 H    | 12.7538 | -3.6871 | -31.5231 H  | 1 <1> | 0.0000 |
| 67 H    | 14.4422 | -4.0307 | -31.0480 H  | 1 <1> | 0.0000 |
| 68 H    | 13.4302 | -3.5374 | -33.8937 H  | 1 <1> | 0.0000 |
| 69 H    | 14.2728 | -2.0739 | -33.4124 H  | 1 <1> | 0.0000 |
| 70 **** | 20.0822 | -2.9194 | -34.6627 LP | 1 <1> | 0.0000 |
| 71 **** | 21.0252 | -4.3722 | -34.6476 LP | 1 <1> | 0.0000 |
| 72 **** | 19.3322 | -1.2419 | -35.6090 LP | 1 <1> | 0.0000 |

|    |      |         |         |             |       |        |
|----|------|---------|---------|-------------|-------|--------|
| 73 | **** | 18.8652 | -0.4434 | -37.0734 LP | 1 <1> | 0.0000 |
| 74 | **** | 18.8109 | -2.6005 | -35.1525 LP | 1 <1> | 0.0000 |
| 75 | **** | 17.6585 | -3.6003 | -35.9725 LP | 1 <1> | 0.0000 |
| 76 | **** | 20.5632 | -1.6097 | -35.1278 LP | 1 <1> | 0.0000 |
| 77 | **** | 22.1532 | -1.2888 | -35.7353 LP | 1 <1> | 0.0000 |
| 78 | **** | 19.4301 | -2.0228 | -32.6816 LP | 1 <1> | 0.0000 |
| 79 | **** | 19.8971 | -2.8213 | -31.2172 LP | 1 <1> | 0.0000 |
| 80 | **** | 18.1991 | -1.6551 | -33.1627 LP | 1 <1> | 0.0000 |
| 81 | **** | 16.6092 | -1.9759 | -32.5552 LP | 1 <1> | 0.0000 |
| 82 | **** | 18.6801 | -0.3454 | -33.6278 LP | 1 <1> | 0.0000 |
| 83 | **** | 17.7372 | 1.1074  | -33.6429 LP | 1 <1> | 0.0000 |
| 84 | **** | 19.9514 | -0.6642 | -33.1381 LP | 1 <1> | 0.0000 |
| 85 | **** | 21.1038 | 0.3355  | -32.3180 LP | 1 <1> | 0.0000 |

@<TRIPOS>BOND

- 1 1 11 ar
- 2 1 12 ar
- 3 1 13 ar
- 4 1 14 ar
- 5 1 15 1
- 6 2 3 1
- 7 2 11 ar
- 8 2 16 ar

9 3 6 1  
10 3 7 1  
11 3 8 1  
12 4 5 1  
13 4 13 ar  
14 4 18 ar  
15 5 9 1  
16 5 10 1  
17 5 48 1  
18 12 17 ar  
19 14 19 ar  
20 15 16 ar  
21 15 18 ar  
22 15 20 ar  
23 15 21 ar  
24 17 20 ar  
25 17 22 1  
26 19 21 ar  
27 19 23 1  
28 22 24 1  
29 22 25 1  
30 22 26 1

31 23 27 1

32 23 28 1

33 23 29 1

34 30 31 1

35 30 35 1

36 30 49 1

37 30 50 1

38 31 32 1

39 31 51 1

40 31 52 1

41 32 33 1

42 32 47 1

43 32 53 1

44 33 34 1

45 33 54 1

46 33 55 1

47 34 35 1

48 34 56 1

49 34 57 1

50 35 40 1

51 36 45 1

52 36 58 1

53 36 59 1  
54 37 38 ar  
55 37 42 ar  
56 37 46 ar  
57 38 39 ar  
58 38 60 1  
59 39 40 ar  
60 39 61 1  
61 40 41 ar  
62 41 42 ar  
63 41 62 1  
64 42 43 ar  
65 43 44 ar  
66 43 63 1  
67 44 45 ar  
68 44 64 1  
69 45 46 ar  
70 46 65 1  
71 47 48 1  
72 47 66 1  
73 47 67 1  
74 48 68 1

75 48 69 1

76 11 70 1

77 11 71 1

78 12 72 1

79 12 73 1

80 13 74 1

81 13 75 1

82 14 76 1

83 14 77 1

84 16 78 1

85 16 79 1

86 18 80 1

87 18 81 1

88 20 82 1

89 20 83 1

90 21 84 1

91 21 85 1

@<TRIPOS>SUBSTRUCTURE

1 \*\*\*\* 1

@<TRIPOS>SET

LONE\_PAIRS STATIC ATOMS <user> \*\*\*\* ""

16 70 71 72 73 74 75 76 77 78 79 80 81 82 83 84 85

S199

DONOR\_HYDROGENS    STATIC    ATOMS    <user>    \*\*\*\*    ""

4 53 58 59 65

ATOM\$BLUE    STATIC    ATOMS    COLORGROUP SYSTEM

16 70 71 72 73 74 75 76 77 78 79 80 81 82 83 84 85

ATOM\$RED    STATIC    ATOMS    COLORGROUP SYSTEM

4 53 58 59 65

@<TRIPOS>COMMENT

> <Gold.Version>

5.7.2

> <Gold.Id.Protein>

unknown|gold\_protein|mol2

> <Gold.Protein.RotatedTorsions>

[ 614 603 602 601 ] final -102.73 input 2.31 | X-H torsion

[ 841 836 835 832 ] final 125.78 input 27.02 | X-H torsion

[ 172 163 162 160 ] final -173.99 input 178.05 | X-H torsion

[ 876 867 866 864 ] final 104.19 input 173.38 | X-H torsion

> <Gold.Protein.ActiveResidues>

TYR19 ILE22 HIS23 ASP25 ASP26 HIS41 GLY42 GLU43 TRP44 LYS46

PHE57 PRO59 SER60 ASN61 TYR62



><Gold.Protein.RotatedAtoms>

20.9297 -1.7540 -30.6598 H 0 0 0 0 0 0 0 0 0 0 0 0 # atno 172 bound\_to 163  
14.2449 -0.4688 -22.9554 H 0 0 0 0 0 0 0 0 0 0 0 0 # atno 614 bound\_to 603  
12.7540 -1.1240 -22.4739 H 0 0 0 0 0 0 0 0 0 0 0 0 # atno 615 bound\_to 603  
13.0284 0.5478 -22.3533 H 0 0 0 0 0 0 0 0 0 0 0 0 # atno 616 bound\_to 603  
16.5506 -14.0024 -27.7917 H 0 0 0 0 0 0 0 0 0 0 0 0 # atno 841 bound\_to 836  
24.0659 -5.3423 -34.0958 H 0 0 0 0 0 0 0 0 0 0 0 0 # atno 876 bound\_to 867  
18.1240 -13.9127 -28.0899 LP 0 0 0 0 0 0 0 0 0 0 0 0 # atno 987 bound\_to 836  
17.0829 -14.3869 -29.2551 LP 0 0 0 0 0 0 0 0 0 0 0 0 # atno 988 bound\_to 836  
21.4476 -0.2625 -30.3728 LP 0 0 0 0 0 0 0 0 0 0 0 0 # atno 998 bound\_to 163  
20.3879 -0.9833 -29.3607 LP 0 0 0 0 0 0 0 0 0 0 0 0 # atno 999 bound\_to 163  
23.8516 -6.7662 -34.8035 LP 0 0 0 0 0 0 0 0 0 0 0 0 # atno 1000 bound\_to 867  
25.3525 -6.2387 -34.4353 LP 0 0 0 0 0 0 0 0 0 0 0 0 # atno 1001 bound\_to 867

><Gold.Score>

| Score | S(PLP) | S(hbond) | S(cho) | S(metal) | DE(clash) | DE(tors) | intcor |
|-------|--------|----------|--------|----------|-----------|----------|--------|
| 60.82 | -61.25 | 0.94     | 0.00   | 0.00     | 0.00      | 1.69     | 0.13   |

><Gold.PLP.Fitness>

60.8179

> <Gold.PLP.PLP>

-61.2462

> <Gold.PLP.part.hbond>

-1.4449

> <Gold.PLP.part.metal>

0.0000

> <Gold.PLP.part.buried>

-4.5743

> <Gold.PLP.part.nonpolar>

-57.0782

> <Gold.PLP.part.repulsive>

0.3093

> <Gold.PLP.ligand.clash>

0.0000

> <Gold.PLP.ligand.torsion>

1.6911

> <Gold.PLP.Chemscore.Hbond>

0.9425

> <Gold.PLP.Chemscore.CHOScore>

0.0000

> <Gold.PLP.Chemscore.Metal>

0.0000

> <Gold.Chemscore.Hbonds>

donor molecule, donor type, donor heavy atom, donor atom, acceptor molecule, acceptor atom, score

P1 H 163 172 L1 16 0.94

> <Gold.PLP.Chemscore.Internal.Correction>

0.1263

# Name: \*\*\*\*\*

# Creating user name zbl

# Creation time: Thu Jun 13 10:31:23 2019

# File generated by GOLD software.

#

@<TRIPOS>MOLECULE

\*\*\*\*\*|pRh-6|mol2|1|dock10

85 91 1

SMALL

USER\_CHARGES

@<TRIPOS>ATOM

|      |         |         |          |       |       |        |
|------|---------|---------|----------|-------|-------|--------|
| 1 Cr | 9.2204  | -0.0823 | -28.2325 | Cr.oh | 1 <1> | 0.0000 |
| 2 C  | 11.6711 | -0.3349 | -26.7489 | C.2   | 1 <1> | 0.0000 |
| 3 C  | 13.1024 | -0.0992 | -26.4186 | C.3   | 1 <1> | 0.0000 |
| 4 C  | 9.4532  | -2.9384 | -28.3890 | C.2   | 1 <1> | 0.0000 |
| 5 C  | 9.6071  | -4.2493 | -29.0839 | C.3   | 1 <1> | 0.0000 |
| 6 H  | 13.1625 | 0.2220  | -25.5852 | H     | 1 <1> | 0.0000 |
| 7 H  | 13.5059 | 0.3078  | -26.9764 | H     | 1 <1> | 0.0000 |
| 8 H  | 13.5968 | -0.9121 | -26.2366 | H     | 1 <1> | 0.0000 |
| 9 H  | 8.5956  | -4.6448 | -29.3659 | H     | 1 <1> | 0.0000 |
| 10 H | 9.1259  | -5.0568 | -28.4713 | H     | 1 <1> | 0.0000 |
| 11 O | 11.1985 | 0.1253  | -27.8269 | O.co2 | 1 <1> | 0.0000 |

S204

|       |         |         |          |       |       |        |
|-------|---------|---------|----------|-------|-------|--------|
| 12 O  | 7.2194  | -0.3129 | -28.4926 | O.co2 | 1 <1> | 0.0000 |
| 13 O  | 9.5172  | -1.8801 | -29.0801 | O.co2 | 1 <1> | 0.0000 |
| 14 O  | 8.9274  | 1.6455  | -27.2663 | O.co2 | 1 <1> | 0.0000 |
| 15 Cr | 8.9701  | -1.2169 | -26.1759 | Cr.oh | 1 <1> | 0.0000 |
| 16 O  | 10.9710 | -0.9863 | -25.9159 | O.co2 | 1 <1> | 0.0000 |
| 17 C  | 6.5193  | -0.9643 | -27.6595 | C.2   | 1 <1> | 0.0000 |
| 18 O  | 9.2630  | -2.9446 | -27.1422 | O.co2 | 1 <1> | 0.0000 |
| 19 C  | 8.7372  | 1.6392  | -26.0194 | C.2   | 1 <1> | 0.0000 |
| 20 O  | 6.9919  | -1.4245 | -26.5816 | O.co2 | 1 <1> | 0.0000 |
| 21 O  | 8.6732  | 0.5809  | -25.3283 | O.co2 | 1 <1> | 0.0000 |
| 22 C  | 5.0880  | -1.2000 | -27.9898 | C.3   | 1 <1> | 0.0000 |
| 23 C  | 8.5833  | 2.9502  | -25.3245 | C.3   | 1 <1> | 0.0000 |
| 24 H  | 5.0279  | -1.5212 | -28.8232 | H     | 1 <1> | 0.0000 |
| 25 H  | 4.6845  | -1.6070 | -27.4320 | H     | 1 <1> | 0.0000 |
| 26 H  | 4.5936  | -0.3871 | -28.1718 | H     | 1 <1> | 0.0000 |
| 27 H  | 9.0256  | 2.9335  | -24.5488 | H     | 1 <1> | 0.0000 |
| 28 H  | 8.7438  | 3.6290  | -25.8410 | H     | 1 <1> | 0.0000 |
| 29 H  | 7.8064  | 2.9272  | -25.0123 | H     | 1 <1> | 0.0000 |
| 30 C  | 14.3906 | -1.4632 | -30.3132 | C.3   | 1 <1> | 0.0000 |
| 31 C  | 13.7772 | -2.8696 | -30.2824 | C.3   | 1 <1> | 0.0000 |
| 32 N  | 12.6159 | -3.0025 | -31.2621 | N.4   | 1 <1> | 0.0000 |
| 33 C  | 12.8013 | -2.3411 | -32.6283 | C.3   | 1 <1> | 0.0000 |

|      |         |         |          |       |       |        |
|------|---------|---------|----------|-------|-------|--------|
| 34 C | 13.4512 | -0.9547 | -32.5142 | C.3   | 1 <1> | 0.0000 |
| 35 N | 14.6906 | -1.2459 | -31.7528 | N.pl3 | 1 <1> | 0.0000 |
| 36 N | 20.6325 | -3.6746 | -35.4375 | N.pl3 | 1 <1> | 0.0000 |
| 37 C | 18.2890 | -2.1903 | -33.4173 | C.ar  | 1 <1> | 0.0000 |
| 38 C | 18.1830 | -1.3274 | -32.3918 | C.ar  | 1 <1> | 0.0000 |
| 39 C | 16.9918 | -0.9995 | -31.8641 | C.ar  | 1 <1> | 0.0000 |
| 40 C | 15.8208 | -1.5101 | -32.3037 | C.ar  | 1 <1> | 0.0000 |
| 41 C | 15.9588 | -2.3545 | -33.3520 | C.ar  | 1 <1> | 0.0000 |
| 42 C | 17.1407 | -2.6897 | -33.9078 | C.ar  | 1 <1> | 0.0000 |
| 43 C | 17.2069 | -3.5373 | -34.9511 | C.ar  | 1 <1> | 0.0000 |
| 44 C | 18.3984 | -3.8630 | -35.4689 | C.ar  | 1 <1> | 0.0000 |
| 45 C | 19.5159 | -3.3463 | -34.9303 | C.ar  | 1 <1> | 0.0000 |
| 46 N | 19.4557 | -2.5240 | -33.9159 | N.pl3 | 1 <1> | 0.0000 |
| 47 C | 12.1173 | -4.4169 | -31.4892 | C.3   | 1 <1> | 0.0000 |
| 48 C | 11.0498 | -4.8310 | -30.0125 | C.3   | 1 <1> | 0.0000 |
| 49 H | 15.2467 | -1.3428 | -29.6188 | H     | 1 <1> | 0.0000 |
| 50 H | 13.6485 | -0.7171 | -29.9466 | H     | 1 <1> | 0.0000 |
| 51 H | 13.4207 | -3.0986 | -29.2511 | H     | 1 <1> | 0.0000 |
| 52 H | 14.6107 | -3.5546 | -30.5507 | H     | 1 <1> | 0.0000 |
| 53 H | 11.8225 | -2.4837 | -30.8144 | H     | 1 <1> | 0.0000 |
| 54 H | 11.8045 | -2.2409 | -33.1199 | H     | 1 <1> | 0.0000 |
| 55 H | 13.4525 | -2.9750 | -33.2748 | H     | 1 <1> | 0.0000 |

|         |         |         |             |       |        |
|---------|---------|---------|-------------|-------|--------|
| 56 H    | 13.5819 | -0.4549 | -33.4937 H  | 1 <1> | 0.0000 |
| 57 H    | 12.7872 | -0.2646 | -31.9437 H  | 1 <1> | 0.0000 |
| 58 H    | 20.6883 | -4.3318 | -36.2557 H  | 1 <1> | 0.0000 |
| 59 H    | 21.5254 | -3.2919 | -35.0358 H  | 1 <1> | 0.0000 |
| 60 H    | 19.0944 | -0.8878 | -31.9525 H  | 1 <1> | 0.0000 |
| 61 H    | 17.0474 | -0.3091 | -31.0079 H  | 1 <1> | 0.0000 |
| 62 H    | 15.0807 | -2.8378 | -33.8047 H  | 1 <1> | 0.0000 |
| 63 H    | 16.2971 | -3.9708 | -35.3998 H  | 1 <1> | 0.0000 |
| 64 H    | 18.4461 | -4.5494 | -36.3321 H  | 1 <1> | 0.0000 |
| 65 H    | 20.3252 | -2.1392 | -33.5221 H  | 1 <1> | 0.0000 |
| 66 H    | 12.9481 | -5.1621 | -31.4384 H  | 1 <1> | 0.0000 |
| 67 H    | 11.4872 | -4.7130 | -32.3648 H  | 1 <1> | 0.0000 |
| 68 H    | 10.9714 | -5.9432 | -29.9626 H  | 1 <1> | 0.0000 |
| 69 H    | 11.8020 | -4.5888 | -29.2144 H  | 1 <1> | 0.0000 |
| 70 **** | 10.2349 | -0.0187 | -28.0520 LP | 1 <1> | 0.0000 |
| 71 **** | 11.7881 | 0.6334  | -28.4547 LP | 1 <1> | 0.0000 |
| 72 **** | 8.1879  | -0.1450 | -28.3085 LP | 1 <1> | 0.0000 |
| 73 **** | 6.8030  | 0.0328  | -29.3334 LP | 1 <1> | 0.0000 |
| 74 **** | 9.4148  | -0.9883 | -28.6395 LP | 1 <1> | 0.0000 |
| 75 **** | 9.6701  | -1.9358 | -30.0668 LP | 1 <1> | 0.0000 |
| 76 **** | 9.0367  | 0.7826  | -27.7597 LP | 1 <1> | 0.0000 |
| 77 **** | 8.9690  | 2.5133  | -27.7614 LP | 1 <1> | 0.0000 |

|         |         |         |             |       |        |
|---------|---------|---------|-------------|-------|--------|
| 78 **** | 10.0025 | -1.1542 | -26.0999 LP | 1 <1> | 0.0000 |
| 79 **** | 11.3874 | -1.3320 | -25.0750 LP | 1 <1> | 0.0000 |
| 80 **** | 9.1537  | -2.0818 | -26.6487 LP | 1 <1> | 0.0000 |
| 81 **** | 9.2215  | -3.8125 | -26.6471 LP | 1 <1> | 0.0000 |
| 82 **** | 7.9556  | -1.2805 | -26.3564 LP | 1 <1> | 0.0000 |
| 83 **** | 6.4023  | -1.9326 | -25.9538 LP | 1 <1> | 0.0000 |
| 84 **** | 8.7756  | -0.3109 | -25.7689 LP | 1 <1> | 0.0000 |
| 85 **** | 8.5203  | 0.6366  | -24.3417 LP | 1 <1> | 0.0000 |

@<TRIPOS>BOND

1 1 11 ar  
2 1 12 ar  
3 1 13 ar  
4 1 14 ar  
5 1 15 1  
6 2 3 1  
7 2 11 ar  
8 2 16 ar  
9 3 6 1  
10 3 7 1  
11 3 8 1  
12 4 5 1  
13 4 13 ar



14 4 18 ar

15 5 9 1

16 5 10 1

17 5 48 1

18 12 17 ar

19 14 19 ar

20 15 16 ar

21 15 18 ar

22 15 20 ar

23 15 21 ar

24 17 20 ar

25 17 22 1

26 19 21 ar

27 19 23 1

28 22 24 1

29 22 25 1

30 22 26 1

31 23 27 1

32 23 28 1

33 23 29 1

34 30 31 1

35 30 35 1

36 30 49 1  
37 30 50 1  
38 31 32 1  
39 31 51 1  
40 31 52 1  
41 32 33 1  
42 32 47 1  
43 32 53 1  
44 33 34 1  
45 33 54 1  
46 33 55 1  
47 34 35 1  
48 34 56 1  
49 34 57 1  
50 35 40 1  
51 36 45 1  
52 36 58 1  
53 36 59 1  
54 37 38 ar  
55 37 42 ar  
56 37 46 ar  
57 38 39 ar

58 38 60 1  
59 39 40 ar  
60 39 61 1  
61 40 41 ar  
62 41 42 ar  
63 41 62 1  
64 42 43 ar  
65 43 44 ar  
66 43 63 1  
67 44 45 ar  
68 44 64 1  
69 45 46 ar  
70 46 65 1  
71 47 48 1  
72 47 66 1  
73 47 67 1  
74 48 68 1  
75 48 69 1  
76 11 70 1  
77 11 71 1  
78 12 72 1  
79 12 73 1

80 13 74 1

81 13 75 1

82 14 76 1

83 14 77 1

84 16 78 1

85 16 79 1

86 18 80 1

87 18 81 1

88 20 82 1

89 20 83 1

90 21 84 1

91 21 85 1

@<TRIPOS>SUBSTRUCTURE

1 \*\*\*\* 1

@<TRIPOS>SET

LONE\_PAIRS STATIC ATOMS <user> \*\*\*\* ""

16 70 71 72 73 74 75 76 77 78 79 80 81 82 83 84 85

DONOR\_HYDROGENS STATIC ATOMS <user> \*\*\*\* ""

4 53 58 59 65

ATOM\$BLUE STATIC ATOMS COLORGROUP SYSTEM

16 70 71 72 73 74 75 76 77 78 79 80 81 82 83 84 85

ATOM\$RED STATIC ATOMS COLORGROUP SYSTEM

4 53 58 59 65

@<TRIPOS>COMMENT

><Gold.Version>

5.7.2

><Gold.Id.Protein>

unknown|gold\_protein|mol2

><Gold.Protein.RotatedTorsions>

[ 614 603 602 601 ] final -162.48 input 2.31 | X-H torsion

[ 841 836 835 832 ] final 168.07 input 27.02 | X-H torsion

[ 172 163 162 160 ] final 168.19 input 178.05 | X-H torsion

[ 876 867 866 864 ] final 116.13 input 173.38 | X-H torsion

><Gold.Protein.ActiveResidues>

TYR19 ILE22 HIS23 ASP25 ASP26 HIS41 GLY42 GLU43 TRP44 LYS46

PHE57 PRO59 SER60 ASN61 TYR62

><Gold.Protein.RotatedAtoms>

21.1119 -1.5951 -30.8072 H 0 0 0 0 0 0 0 0 0 0 0 0 # atno 172 bound\_to 163

13.9324 0.4244 -22.7148 H 0 0 0 0 0 0 0 0 0 0 0 0 # atno 614 bound\_to 603

13.6535 -1.2464 -22.8346 H 0 0 0 0 0 0 0 0 0 0 0 0 # atno 615 bound\_to 603

S213

12.4404 -0.2214 -22.2326 H 0 0 0 0 0 0 0 0 0 0 0 0 0 # atno 616 bound\_to 603  
16.3393 -14.1992 -28.3836 H 0 0 0 0 0 0 0 0 0 0 0 0 # atno 841 bound\_to 836  
24.2471 -5.2982 -34.0602 H 0 0 0 0 0 0 0 0 0 0 0 0 # atno 876 bound\_to 867  
17.6798 -13.8311 -27.5834 LP 0 0 0 0 0 0 0 0 0 0 0 0 # atno 987 bound\_to 836  
17.7435 -14.2671 -29.1558 LP 0 0 0 0 0 0 0 0 0 0 0 0 # atno 988 bound\_to 836  
21.3328 -0.1593 -30.1256 LP 0 0 0 0 0 0 0 0 0 0 0 0 # atno 998 bound\_to 163  
20.3165 -1.2489 -29.4572 LP 0 0 0 0 0 0 0 0 0 0 0 0 # atno 999 bound\_to 163  
23.7100 -6.6390 -34.7585 LP 0 0 0 0 0 0 0 0 0 0 0 0 # atno 1000 bound\_to 867  
25.3088 -6.4110 -34.5168 LP 0 0 0 0 0 0 0 0 0 0 0 0 # atno 1001 bound\_to 867

><Gold.Score>

| Score | S(PLP) | S(hbond) | S(cho) | S(metal) | DE(clash) | DE(tors) | intcor |
|-------|--------|----------|--------|----------|-----------|----------|--------|
| 47.00 | -49.19 | 0.00     | 0.00   | 0.00     | 0.00      | 1.16     | 0.13   |

><Gold.PLP.Fitness>

46.9973

><Gold.PLP.PLP>

-49.1946

><Gold.PLP.part.hbond>

0.0000

> <Gold.PLP.part.metal>

0.0000

> <Gold.PLP.part.buried>

-6.0118

> <Gold.PLP.part.nonpolar>

-43.9907

> <Gold.PLP.part.repulsive>

0.0430

> <Gold.PLP.ligand.clash>

0.0000

> <Gold.PLP.ligand.torsion>

1.1618

> <Gold.PLP.Chemscore.Hbond>

0.0000

> <Gold.PLP.Chemscore.CHOScore>

0.0000

> <Gold.PLP.Chemscore.Metal>

0.0000

> <Gold.PLP.Chemscore.Internal.Correction>

0.1263



## References

- (1) Kawaguchi, M.; Okabe, T.; Okudaira, S.; Nishimasu, H.; Ishitani, R.; Kojima, H.; Nureki, O.; Aoki, J.; Nagano, T. Screening and X-ray Crystal Structure-based Optimization of Autotaxin (ENPP2) Inhibitors, Using a Newly Developed Fluorescence Probe. *ACS Chem. Biol.* **2013**, *8*, 1713–1721. DOI: 10.1021/cb400150c.
- (2) Olah, G.; Karpeles, R.; Narang, S. Preparation of  $\omega$ -haloalkylcarboxylic acids and esters or related compounds from lactones and boron trihalides. *Synthesis* **1982**, *11*, 963–965.
- (3) Wheatley, N. C.; Andrews, K. T.; Tran, T. L.; Lucke, A. J.; Reid, R. C.; Fairlie, D. P. Antimalarial histone deacetylase inhibitors containing cinnamate or NSAID components. *Bioorganic & Medicinal Chemistry Letters* **2010**, *20*, 7080–7084. DOI: 10.1016/j.bmcl.2010.09.096.
- (4) Martin, S. C.; Minus, M. B.; Ball, Z. T. Chemical Posttranslational Modification with Designed Rhodium(II) Catalysts. In *Methods in Enzymology*; Pecoraro, V. L., Ed.; Academic Press, 2016; Vol. 580, pp 1–19.
- (5) Smith, J. A.; Jones, R. K.; Booker, G. W.; Pyke, S. M. Sequential and Selective Buchwald–Hartwig Amination Reactions for the Controlled Functionalization of 6-Bromo-2-chloroquinoline: Synthesis of Ligands for the Tec Src Homology 3 Domain. *J. Org. Chem.* **2008**, *73*, 8880–8892. DOI: 10.1021/jo801808r.
- (6) Nimse, S. B.; Pal, D.; Mazumder, A.; Mazumder, R. Synthesis of Cinnamanilide Derivatives and Their Antioxidant and Antimicrobial Activity. *Journal of Chemistry* **2015**, 1–5. DOI: 10.1155/2015/208910.
- (7) Wang, T.-C.; Chen, Y.-L.; Lee, K.-H.; Tzeng, C.-C. Lewis Acid Catalyzed Reaction of Cinnamanilides: Competition of Intramolecular and Intermolecular Friedel-Crafts Reaction. *Synthesis* **1997**, *1997*, 87–90. DOI: 10.1055/s-1997-1505.
- (8) Tröster, A.; Alonso, R.; Bauer, A.; Bach, T. Enantioselective Intermolecular [2 + 2] Photocycloaddition Reactions of 2(1H)-Quinolones Induced by Visible Light Irradiation. *J. Am. Chem. Soc.* **2016**, *138*, 7808–7811. DOI: 10.1021/jacs.6b03221.
